# Supplementary material for: A Retrospective External Validation of the Cleveland Clinic Malignancy Probability Prediction Model for Indeterminate Pulmonary Nodules
Source: PubMed Central journal article supplement — Mayo Clin Proc Innov Qual Outcomes. 2024 Jul 3;8(4):375–83. doi: 10.1016/j.mayocpiqo.2024.05.005 (PMC11283066; doi:10.1016/j.mayocpiqo.2024.05.005), 2024-07-03
Supplement: mmc1.pdf [file mmc1.pdf]

1 Supplemental Table 1. Sensitivity, specificity, positive predictive value, and negative predictive value, along with 95%  
 2 confidence intervals, for all observed model values in combined MC and LUMC data set. CCM, Time 1.  
 3

| CC M  | No. of Correctly Predicted Events | No. of Correctly Predicted Nonevents | No. of Nonevents Predicted as Events | No. of Events Predicted as Nonevents | Sensitivity (95% CI) | Specificity (95% CI) | Positive predictive value (95% CI) | Negative predictive value (95% CI) |
|-------|-----------------------------------|--------------------------------------|--------------------------------------|--------------------------------------|----------------------|----------------------|------------------------------------|------------------------------------|
| 97.70 | 0                                 | 100                                  | 1                                    | 195                                  | 0.00 (0.00 , 0.00)   | 0.99 (0.99 , 0.99)   | 0.00 (0.00 , 0.00)                 | 0.34 (0.31 , 0.36)                 |
| 97.30 | 1                                 | 100                                  | 1                                    | 194                                  | 0.01 (0.00 , 0.01)   | 0.99 (0.99 , 0.99)   | 0.50 (0.15 , 0.85)                 | 0.34 (0.31 , 0.37)                 |
| 97.00 | 2                                 | 100                                  | 1                                    | 193                                  | 0.01 (0.01 , 0.01)   | 0.99 (0.99 , 0.99)   | 0.67 (0.42 , 0.92)                 | 0.34 (0.32 , 0.37)                 |
| 96.90 | 3                                 | 100                                  | 1                                    | 192                                  | 0.02 (0.01 , 0.02)   | 0.99 (0.99 , 0.99)   | 0.75 (0.57 , 0.93)                 | 0.34 (0.32 , 0.37)                 |
| 96.70 | 4                                 | 100                                  | 1                                    | 191                                  | 0.02 (0.02 , 0.02)   | 0.99 (0.99 , 0.99)   | 0.80 (0.66 , 0.94)                 | 0.34 (0.32 , 0.37)                 |
| 96.40 | 6                                 | 100                                  | 1                                    | 189                                  | 0.03 (0.03 , 0.03)   | 0.99 (0.99 , 0.99)   | 0.86 (0.77 , 0.95)                 | 0.35 (0.32 , 0.37)                 |
| 96.30 | 7                                 | 100                                  | 1                                    | 188                                  | 0.04 (0.03 , 0.04)   | 0.99 (0.99 , 0.99)   | 0.88 (0.80 , 0.95)                 | 0.35 (0.32 , 0.37)                 |
| 96.20 | 7                                 | 99                                   | 2                                    | 188                                  | 0.04 (0.03 , 0.04)   | 0.98 (0.98 , 0.98)   | 0.78 (0.66 , 0.89)                 | 0.34 (0.32 , 0.37)                 |
| 96.10 | 8                                 | 99                                   | 2                                    | 187                                  | 0.04 (0.04 , 0.05)   | 0.98 (0.98 , 0.98)   | 0.80 (0.70 , 0.90)                 | 0.35 (0.32 , 0.37)                 |
| 95.60 | 9                                 | 99                                   | 2                                    | 186                                  | 0.05 (0.04 , 0.05)   | 0.98 (0.98 , 0.98)   | 0.82 (0.73 , 0.91)                 | 0.35 (0.32 , 0.37)                 |
| 95.30 | 10                                | 99                                   | 2                                    | 185                                  | 0.05 (0.04 , 0.06)   | 0.98 (0.98 , 0.98)   | 0.83 (0.75 , 0.91)                 | 0.35 (0.32 , 0.38)                 |
| 94.70 | 12                                | 98                                   | 3                                    | 183                                  | 0.06 (0.05 , 0.07)   | 0.97 (0.96 , 0.98)   | 0.80 (0.72 , 0.88)                 | 0.35 (0.32 , 0.38)                 |
| 94.60 | 13                                | 97                                   | 4                                    | 182                                  | 0.07 (0.06 , 0.08)   | 0.96 (0.95 , 0.97)   | 0.76 (0.68 , 0.85)                 | 0.35 (0.32 , 0.37)                 |
| 94.30 | 14                                | 97                                   | 4                                    | 181                                  | 0.07 (0.06 , 0.08)   | 0.96 (0.95 , 0.97)   | 0.78 (0.70 , 0.86)                 | 0.35 (0.32 , 0.38)                 |
| 94.20 | 15                                | 97                                   | 4                                    | 180                                  | 0.08 (0.07 , 0.09)   | 0.96 (0.95 , 0.97)   | 0.79 (0.71 , 0.86)                 | 0.35 (0.32 , 0.38)                 |
| 93.60 | 18                                | 97                                   | 4                                    | 177                                  | 0.09 (0.08 , 0.10)   | 0.96 (0.95 , 0.97)   | 0.82 (0.76 , 0.88)                 | 0.35 (0.33 , 0.38)                 |
| 93.40 | 20                                | 97                                   | 4                                    | 175                                  | 0.10 (0.09 , 0.12)   | 0.96 (0.95 , 0.97)   | 0.83 (0.78 , 0.89)                 | 0.36 (0.33 , 0.38)                 |

|       |    |    |   |     |                    |                    |                    |                    |
|-------|----|----|---|-----|--------------------|--------------------|--------------------|--------------------|
| 93.30 | 21 | 97 | 4 | 174 | 0.11 (0.09 , 0.12) | 0.96 (0.95 , 0.97) | 0.84 (0.79 , 0.89) | 0.36 (0.33 , 0.39) |
| 93.10 | 22 | 97 | 4 | 173 | 0.11 (0.10 , 0.13) | 0.96 (0.95 , 0.97) | 0.85 (0.80 , 0.90) | 0.36 (0.33 , 0.39) |
| 92.40 | 24 | 97 | 4 | 171 | 0.12 (0.11 , 0.14) | 0.96 (0.95 , 0.97) | 0.86 (0.81 , 0.90) | 0.36 (0.33 , 0.39) |
| 92.30 | 26 | 95 | 6 | 169 | 0.13 (0.12 , 0.15) | 0.94 (0.93 , 0.95) | 0.81 (0.76 , 0.87) | 0.36 (0.33 , 0.39) |
| 92.10 | 29 | 95 | 6 | 166 | 0.15 (0.13 , 0.17) | 0.94 (0.93 , 0.95) | 0.83 (0.78 , 0.88) | 0.36 (0.34 , 0.39) |
| 91.80 | 30 | 95 | 6 | 165 | 0.15 (0.14 , 0.17) | 0.94 (0.93 , 0.95) | 0.83 (0.79 , 0.88) | 0.37 (0.34 , 0.39) |
| 91.70 | 32 | 95 | 6 | 163 | 0.16 (0.14 , 0.18) | 0.94 (0.93 , 0.95) | 0.84 (0.80 , 0.88) | 0.37 (0.34 , 0.40) |
| 91.43 | 33 | 95 | 6 | 162 | 0.17 (0.15 , 0.19) | 0.94 (0.93 , 0.95) | 0.85 (0.81 , 0.89) | 0.37 (0.34 , 0.40) |
| 91.40 | 34 | 95 | 6 | 161 | 0.17 (0.15 , 0.19) | 0.94 (0.93 , 0.95) | 0.85 (0.81 , 0.89) | 0.37 (0.34 , 0.40) |
| 91.00 | 35 | 95 | 6 | 160 | 0.18 (0.16 , 0.20) | 0.94 (0.93 , 0.95) | 0.85 (0.82 , 0.89) | 0.37 (0.34 , 0.40) |
| 90.90 | 36 | 95 | 6 | 159 | 0.18 (0.16 , 0.21) | 0.94 (0.93 , 0.95) | 0.86 (0.82 , 0.89) | 0.37 (0.35 , 0.40) |
| 90.60 | 37 | 95 | 6 | 158 | 0.19 (0.17 , 0.21) | 0.94 (0.93 , 0.95) | 0.86 (0.82 , 0.90) | 0.38 (0.35 , 0.40) |
| 90.40 | 38 | 95 | 6 | 157 | 0.19 (0.17 , 0.22) | 0.94 (0.93 , 0.95) | 0.86 (0.83 , 0.90) | 0.38 (0.35 , 0.41) |
| 90.30 | 39 | 95 | 6 | 156 | 0.20 (0.18 , 0.22) | 0.94 (0.93 , 0.95) | 0.87 (0.83 , 0.90) | 0.38 (0.35 , 0.41) |
| 90.10 | 41 | 95 | 6 | 154 | 0.21 (0.19 , 0.23) | 0.94 (0.93 , 0.95) | 0.87 (0.84 , 0.90) | 0.38 (0.35 , 0.41) |
| 89.70 | 41 | 94 | 7 | 154 | 0.21 (0.19 , 0.23) | 0.93 (0.92 , 0.94) | 0.85 (0.82 , 0.89) | 0.38 (0.35 , 0.41) |
| 89.40 | 42 | 93 | 8 | 153 | 0.22 (0.19 , 0.24) | 0.92 (0.91 , 0.94) | 0.84 (0.80 , 0.88) | 0.38 (0.35 , 0.41) |
| 89.10 | 43 | 93 | 8 | 152 | 0.22 (0.20 , 0.24) | 0.92 (0.91 , 0.94) | 0.84 (0.81 , 0.88) | 0.38 (0.35 , 0.41) |
| 89.00 | 43 | 92 | 9 | 152 | 0.22 (0.20 , 0.24) | 0.91 (0.90 , 0.93) | 0.83 (0.79 , 0.87) | 0.38 (0.35 , 0.41) |
| 88.70 | 45 | 92 | 9 | 150 | 0.23 (0.21 , 0.26) | 0.91 (0.90 , 0.93) | 0.83 (0.80 , 0.87) | 0.38 (0.35 , 0.41) |
| 88.60 | 47 | 92 | 9 | 148 | 0.24 (0.22 , 0.27) | 0.91 (0.90 , 0.93) | 0.84 (0.80 , 0.87) | 0.38 (0.35 , 0.41) |
| 88.50 | 48 | 92 | 9 | 147 | 0.25 (0.22 , 0.27) | 0.91 (0.90 , 0.93) | 0.84 (0.81 , 0.88) | 0.38 (0.35 , 0.41) |

|       |    |    |    |     |                    |                    |                    |                    |
|-------|----|----|----|-----|--------------------|--------------------|--------------------|--------------------|
| 88.40 | 49 | 92 | 9  | 146 | 0.25 (0.22 , 0.28) | 0.91 (0.90 , 0.93) | 0.84 (0.81 , 0.88) | 0.39 (0.36 , 0.42) |
| 88.30 | 50 | 92 | 9  | 145 | 0.26 (0.23 , 0.28) | 0.91 (0.90 , 0.93) | 0.85 (0.81 , 0.88) | 0.39 (0.36 , 0.42) |
| 88.10 | 51 | 92 | 9  | 144 | 0.26 (0.23 , 0.29) | 0.91 (0.90 , 0.93) | 0.85 (0.82 , 0.88) | 0.39 (0.36 , 0.42) |
| 87.80 | 52 | 91 | 10 | 143 | 0.27 (0.24 , 0.29) | 0.90 (0.88 , 0.92) | 0.84 (0.81 , 0.87) | 0.39 (0.36 , 0.42) |
| 87.70 | 54 | 91 | 10 | 141 | 0.28 (0.25 , 0.31) | 0.90 (0.88 , 0.92) | 0.84 (0.81 , 0.88) | 0.39 (0.36 , 0.42) |
| 87.60 | 55 | 91 | 10 | 140 | 0.28 (0.25 , 0.31) | 0.90 (0.88 , 0.92) | 0.85 (0.81 , 0.88) | 0.39 (0.36 , 0.42) |
| 87.50 | 56 | 91 | 10 | 139 | 0.29 (0.26 , 0.32) | 0.90 (0.88 , 0.92) | 0.85 (0.82 , 0.88) | 0.40 (0.36 , 0.43) |
| 87.20 | 57 | 91 | 10 | 138 | 0.29 (0.26 , 0.32) | 0.90 (0.88 , 0.92) | 0.85 (0.82 , 0.88) | 0.40 (0.37 , 0.43) |
| 86.70 | 57 | 89 | 12 | 138 | 0.29 (0.26 , 0.32) | 0.88 (0.86 , 0.90) | 0.83 (0.79 , 0.86) | 0.39 (0.36 , 0.42) |
| 86.20 | 58 | 89 | 12 | 137 | 0.30 (0.27 , 0.33) | 0.88 (0.86 , 0.90) | 0.83 (0.80 , 0.86) | 0.39 (0.36 , 0.42) |
| 86.10 | 59 | 89 | 12 | 136 | 0.30 (0.27 , 0.33) | 0.88 (0.86 , 0.90) | 0.83 (0.80 , 0.86) | 0.40 (0.36 , 0.43) |
| 85.80 | 60 | 89 | 12 | 135 | 0.31 (0.28 , 0.34) | 0.88 (0.86 , 0.90) | 0.83 (0.80 , 0.87) | 0.40 (0.37 , 0.43) |
| 85.60 | 62 | 88 | 13 | 133 | 0.32 (0.29 , 0.35) | 0.87 (0.85 , 0.89) | 0.83 (0.79 , 0.86) | 0.40 (0.37 , 0.43) |
| 85.50 | 63 | 88 | 13 | 132 | 0.32 (0.29 , 0.35) | 0.87 (0.85 , 0.89) | 0.83 (0.80 , 0.86) | 0.40 (0.37 , 0.43) |
| 84.70 | 65 | 87 | 14 | 130 | 0.33 (0.30 , 0.36) | 0.86 (0.84 , 0.88) | 0.82 (0.79 , 0.85) | 0.40 (0.37 , 0.43) |
| 84.60 | 67 | 86 | 15 | 128 | 0.34 (0.31 , 0.38) | 0.85 (0.83 , 0.88) | 0.82 (0.78 , 0.85) | 0.40 (0.37 , 0.43) |
| 84.30 | 68 | 86 | 15 | 127 | 0.35 (0.32 , 0.38) | 0.85 (0.83 , 0.88) | 0.82 (0.79 , 0.85) | 0.40 (0.37 , 0.44) |
| 84.20 | 69 | 86 | 15 | 126 | 0.35 (0.32 , 0.39) | 0.85 (0.83 , 0.88) | 0.82 (0.79 , 0.85) | 0.41 (0.37 , 0.44) |
| 84.10 | 69 | 85 | 16 | 126 | 0.35 (0.32 , 0.39) | 0.84 (0.82 , 0.87) | 0.81 (0.78 , 0.84) | 0.40 (0.37 , 0.44) |
| 83.90 | 69 | 84 | 17 | 126 | 0.35 (0.32 , 0.39) | 0.83 (0.80 , 0.86) | 0.80 (0.77 , 0.84) | 0.40 (0.37 , 0.43) |
| 83.60 | 69 | 83 | 18 | 126 | 0.35 (0.32 , 0.39) | 0.82 (0.79 , 0.85) | 0.79 (0.76 , 0.83) | 0.40 (0.36 , 0.43) |
| 83.50 | 72 | 83 | 18 | 123 | 0.37 (0.34 , 0.40) | 0.82 (0.79 , 0.85) | 0.80 (0.77 , 0.83) | 0.40 (0.37 , 0.44) |

|       |    |    |    |     |                    |                    |                    |                    |
|-------|----|----|----|-----|--------------------|--------------------|--------------------|--------------------|
| 83.20 | 73 | 83 | 18 | 122 | 0.37 (0.34 , 0.41) | 0.82 (0.79 , 0.85) | 0.80 (0.77 , 0.83) | 0.40 (0.37 , 0.44) |
| 82.90 | 75 | 83 | 18 | 120 | 0.38 (0.35 , 0.42) | 0.82 (0.79 , 0.85) | 0.81 (0.77 , 0.84) | 0.41 (0.38 , 0.44) |
| 82.80 | 76 | 83 | 18 | 119 | 0.39 (0.36 , 0.42) | 0.82 (0.79 , 0.85) | 0.81 (0.78 , 0.84) | 0.41 (0.38 , 0.44) |
| 82.70 | 78 | 83 | 18 | 117 | 0.40 (0.37 , 0.43) | 0.82 (0.79 , 0.85) | 0.81 (0.78 , 0.84) | 0.42 (0.38 , 0.45) |
| 82.50 | 79 | 83 | 18 | 116 | 0.41 (0.37 , 0.44) | 0.82 (0.79 , 0.85) | 0.81 (0.78 , 0.84) | 0.42 (0.38 , 0.45) |
| 82.40 | 81 | 83 | 18 | 114 | 0.42 (0.38 , 0.45) | 0.82 (0.79 , 0.85) | 0.82 (0.79 , 0.85) | 0.42 (0.39 , 0.46) |
| 81.90 | 83 | 83 | 18 | 112 | 0.43 (0.39 , 0.46) | 0.82 (0.79 , 0.85) | 0.82 (0.79 , 0.85) | 0.43 (0.39 , 0.46) |
| 81.70 | 85 | 83 | 18 | 110 | 0.44 (0.40 , 0.47) | 0.82 (0.79 , 0.85) | 0.83 (0.80 , 0.85) | 0.43 (0.40 , 0.46) |
| 81.60 | 86 | 83 | 18 | 109 | 0.44 (0.41 , 0.48) | 0.82 (0.79 , 0.85) | 0.83 (0.80 , 0.85) | 0.43 (0.40 , 0.47) |
| 81.30 | 87 | 83 | 18 | 108 | 0.45 (0.41 , 0.48) | 0.82 (0.79 , 0.85) | 0.83 (0.80 , 0.86) | 0.43 (0.40 , 0.47) |
| 81.00 | 87 | 82 | 19 | 108 | 0.45 (0.41 , 0.48) | 0.81 (0.78 , 0.84) | 0.82 (0.79 , 0.85) | 0.43 (0.40 , 0.47) |
| 80.80 | 88 | 82 | 19 | 107 | 0.45 (0.42 , 0.49) | 0.81 (0.78 , 0.84) | 0.82 (0.79 , 0.85) | 0.43 (0.40 , 0.47) |
| 80.60 | 89 | 82 | 19 | 106 | 0.46 (0.42 , 0.49) | 0.81 (0.78 , 0.84) | 0.82 (0.80 , 0.85) | 0.44 (0.40 , 0.47) |
| 80.50 | 92 | 82 | 19 | 103 | 0.47 (0.44 , 0.51) | 0.81 (0.78 , 0.84) | 0.83 (0.80 , 0.86) | 0.44 (0.41 , 0.48) |
| 80.30 | 94 | 82 | 19 | 101 | 0.48 (0.45 , 0.52) | 0.81 (0.78 , 0.84) | 0.83 (0.81 , 0.86) | 0.45 (0.41 , 0.48) |
| 79.90 | 95 | 82 | 19 | 100 | 0.49 (0.45 , 0.52) | 0.81 (0.78 , 0.84) | 0.83 (0.81 , 0.86) | 0.45 (0.41 , 0.49) |
| 79.50 | 96 | 82 | 19 | 99  | 0.49 (0.46 , 0.53) | 0.81 (0.78 , 0.84) | 0.83 (0.81 , 0.86) | 0.45 (0.42 , 0.49) |
| 79.30 | 96 | 81 | 20 | 99  | 0.49 (0.46 , 0.53) | 0.80 (0.77 , 0.83) | 0.83 (0.80 , 0.85) | 0.45 (0.41 , 0.49) |
| 79.20 | 97 | 81 | 20 | 98  | 0.50 (0.46 , 0.53) | 0.80 (0.77 , 0.83) | 0.83 (0.80 , 0.85) | 0.45 (0.42 , 0.49) |
| 79.10 | 97 | 80 | 21 | 98  | 0.50 (0.46 , 0.53) | 0.79 (0.76 , 0.82) | 0.82 (0.80 , 0.85) | 0.45 (0.41 , 0.49) |
| 79.00 | 97 | 79 | 22 | 98  | 0.50 (0.46 , 0.53) | 0.78 (0.75 , 0.82) | 0.82 (0.79 , 0.84) | 0.45 (0.41 , 0.48) |
| 78.70 | 97 | 78 | 23 | 98  | 0.50 (0.46 , 0.53) | 0.77 (0.74 , 0.81) | 0.81 (0.78 , 0.84) | 0.44 (0.41 , 0.48) |

|       |     |    |    |    |                    |                    |                    |                    |
|-------|-----|----|----|----|--------------------|--------------------|--------------------|--------------------|
| 78.40 | 98  | 78 | 23 | 97 | 0.50 (0.47 , 0.54) | 0.77 (0.74 , 0.81) | 0.81 (0.78 , 0.84) | 0.45 (0.41 , 0.48) |
| 78.20 | 98  | 77 | 24 | 97 | 0.50 (0.47 , 0.54) | 0.76 (0.73 , 0.80) | 0.80 (0.78 , 0.83) | 0.44 (0.41 , 0.48) |
| 78.00 | 99  | 77 | 24 | 96 | 0.51 (0.47 , 0.54) | 0.76 (0.73 , 0.80) | 0.80 (0.78 , 0.83) | 0.45 (0.41 , 0.48) |
| 77.90 | 99  | 76 | 25 | 96 | 0.51 (0.47 , 0.54) | 0.75 (0.72 , 0.79) | 0.80 (0.77 , 0.83) | 0.44 (0.41 , 0.48) |
| 77.70 | 100 | 76 | 25 | 95 | 0.51 (0.48 , 0.55) | 0.75 (0.72 , 0.79) | 0.80 (0.77 , 0.83) | 0.44 (0.41 , 0.48) |
| 77.40 | 101 | 76 | 25 | 94 | 0.52 (0.48 , 0.55) | 0.75 (0.72 , 0.79) | 0.80 (0.77 , 0.83) | 0.45 (0.41 , 0.48) |
| 77.20 | 102 | 76 | 25 | 93 | 0.52 (0.49 , 0.56) | 0.75 (0.72 , 0.79) | 0.80 (0.78 , 0.83) | 0.45 (0.41 , 0.49) |
| 77.10 | 103 | 76 | 25 | 92 | 0.53 (0.49 , 0.56) | 0.75 (0.72 , 0.79) | 0.80 (0.78 , 0.83) | 0.45 (0.41 , 0.49) |
| 76.80 | 103 | 75 | 26 | 92 | 0.53 (0.49 , 0.56) | 0.74 (0.71 , 0.78) | 0.80 (0.77 , 0.83) | 0.45 (0.41 , 0.49) |
| 76.70 | 104 | 75 | 26 | 91 | 0.53 (0.50 , 0.57) | 0.74 (0.71 , 0.78) | 0.80 (0.77 , 0.83) | 0.45 (0.41 , 0.49) |
| 76.40 | 105 | 74 | 27 | 90 | 0.54 (0.50 , 0.57) | 0.73 (0.69 , 0.77) | 0.80 (0.77 , 0.82) | 0.45 (0.41 , 0.49) |
| 76.30 | 106 | 73 | 28 | 89 | 0.54 (0.51 , 0.58) | 0.72 (0.68 , 0.76) | 0.79 (0.76 , 0.82) | 0.45 (0.41 , 0.49) |
| 76.20 | 107 | 73 | 28 | 88 | 0.55 (0.51 , 0.58) | 0.72 (0.68 , 0.76) | 0.79 (0.76 , 0.82) | 0.45 (0.42 , 0.49) |
| 76.00 | 107 | 72 | 29 | 88 | 0.55 (0.51 , 0.58) | 0.71 (0.67 , 0.75) | 0.79 (0.76 , 0.81) | 0.45 (0.41 , 0.49) |
| 75.90 | 108 | 72 | 29 | 87 | 0.55 (0.52 , 0.59) | 0.71 (0.67 , 0.75) | 0.79 (0.76 , 0.82) | 0.45 (0.41 , 0.49) |
| 75.80 | 108 | 71 | 30 | 87 | 0.55 (0.52 , 0.59) | 0.70 (0.66 , 0.74) | 0.78 (0.75 , 0.81) | 0.45 (0.41 , 0.49) |
| 75.30 | 109 | 71 | 30 | 86 | 0.56 (0.52 , 0.59) | 0.70 (0.66 , 0.74) | 0.78 (0.76 , 0.81) | 0.45 (0.41 , 0.49) |
| 75.20 | 110 | 71 | 30 | 85 | 0.56 (0.53 , 0.60) | 0.70 (0.66 , 0.74) | 0.79 (0.76 , 0.81) | 0.46 (0.42 , 0.49) |
| 75.10 | 111 | 71 | 30 | 84 | 0.57 (0.53 , 0.60) | 0.70 (0.66 , 0.74) | 0.79 (0.76 , 0.81) | 0.46 (0.42 , 0.50) |
| 75.00 | 113 | 71 | 30 | 82 | 0.58 (0.55 , 0.61) | 0.70 (0.66 , 0.74) | 0.79 (0.76 , 0.82) | 0.46 (0.42 , 0.50) |
| 74.10 | 114 | 71 | 30 | 81 | 0.58 (0.55 , 0.62) | 0.70 (0.66 , 0.74) | 0.79 (0.76 , 0.82) | 0.47 (0.43 , 0.51) |
| 73.70 | 114 | 70 | 31 | 81 | 0.58 (0.55 , 0.62) | 0.69 (0.65 , 0.73) | 0.79 (0.76 , 0.81) | 0.46 (0.42 , 0.50) |

|       |     |    |    |    |                    |                    |                    |                    |
|-------|-----|----|----|----|--------------------|--------------------|--------------------|--------------------|
| 73.50 | 114 | 69 | 32 | 81 | 0.58 (0.55 , 0.62) | 0.68 (0.64 , 0.73) | 0.78 (0.75 , 0.81) | 0.46 (0.42 , 0.50) |
| 73.10 | 115 | 69 | 32 | 80 | 0.59 (0.56 , 0.62) | 0.68 (0.64 , 0.73) | 0.78 (0.75 , 0.81) | 0.46 (0.42 , 0.50) |
| 72.50 | 115 | 68 | 33 | 80 | 0.59 (0.56 , 0.62) | 0.67 (0.63 , 0.72) | 0.78 (0.75 , 0.80) | 0.46 (0.42 , 0.50) |
| 72.30 | 116 | 68 | 33 | 79 | 0.59 (0.56 , 0.63) | 0.67 (0.63 , 0.72) | 0.78 (0.75 , 0.81) | 0.46 (0.42 , 0.50) |
| 72.20 | 117 | 68 | 33 | 78 | 0.60 (0.57 , 0.63) | 0.67 (0.63 , 0.72) | 0.78 (0.75 , 0.81) | 0.47 (0.43 , 0.51) |
| 71.90 | 118 | 68 | 33 | 77 | 0.61 (0.57 , 0.64) | 0.67 (0.63 , 0.72) | 0.78 (0.75 , 0.81) | 0.47 (0.43 , 0.51) |
| 71.80 | 119 | 68 | 33 | 76 | 0.61 (0.58 , 0.64) | 0.67 (0.63 , 0.72) | 0.78 (0.76 , 0.81) | 0.47 (0.43 , 0.51) |
| 71.60 | 120 | 68 | 33 | 75 | 0.62 (0.58 , 0.65) | 0.67 (0.63 , 0.72) | 0.78 (0.76 , 0.81) | 0.48 (0.43 , 0.52) |
| 70.20 | 120 | 67 | 34 | 75 | 0.62 (0.58 , 0.65) | 0.66 (0.62 , 0.71) | 0.78 (0.75 , 0.81) | 0.47 (0.43 , 0.51) |
| 70.10 | 121 | 67 | 34 | 74 | 0.62 (0.59 , 0.65) | 0.66 (0.62 , 0.71) | 0.78 (0.75 , 0.81) | 0.48 (0.43 , 0.52) |
| 70.00 | 122 | 67 | 34 | 73 | 0.63 (0.59 , 0.66) | 0.66 (0.62 , 0.71) | 0.78 (0.76 , 0.81) | 0.48 (0.44 , 0.52) |
| 69.80 | 122 | 66 | 35 | 73 | 0.63 (0.59 , 0.66) | 0.65 (0.61 , 0.70) | 0.78 (0.75 , 0.80) | 0.47 (0.43 , 0.52) |
| 69.70 | 123 | 66 | 35 | 72 | 0.63 (0.60 , 0.66) | 0.65 (0.61 , 0.70) | 0.78 (0.75 , 0.81) | 0.48 (0.44 , 0.52) |
| 69.40 | 123 | 65 | 36 | 72 | 0.63 (0.60 , 0.66) | 0.64 (0.60 , 0.69) | 0.77 (0.75 , 0.80) | 0.47 (0.43 , 0.52) |
| 69.20 | 124 | 65 | 36 | 71 | 0.64 (0.60 , 0.67) | 0.64 (0.60 , 0.69) | 0.78 (0.75 , 0.80) | 0.48 (0.44 , 0.52) |
| 68.80 | 125 | 65 | 36 | 70 | 0.64 (0.61 , 0.67) | 0.64 (0.60 , 0.69) | 0.78 (0.75 , 0.80) | 0.48 (0.44 , 0.52) |
| 68.40 | 126 | 65 | 36 | 69 | 0.65 (0.61 , 0.68) | 0.64 (0.60 , 0.69) | 0.78 (0.75 , 0.80) | 0.49 (0.44 , 0.53) |
| 68.30 | 127 | 65 | 36 | 68 | 0.65 (0.62 , 0.68) | 0.64 (0.60 , 0.69) | 0.78 (0.75 , 0.81) | 0.49 (0.45 , 0.53) |
| 68.20 | 128 | 65 | 36 | 67 | 0.66 (0.62 , 0.69) | 0.64 (0.60 , 0.69) | 0.78 (0.75 , 0.81) | 0.49 (0.45 , 0.54) |
| 67.00 | 130 | 65 | 36 | 65 | 0.67 (0.64 , 0.70) | 0.64 (0.60 , 0.69) | 0.78 (0.76 , 0.81) | 0.50 (0.46 , 0.54) |
| 66.50 | 131 | 65 | 36 | 64 | 0.67 (0.64 , 0.70) | 0.64 (0.60 , 0.69) | 0.78 (0.76 , 0.81) | 0.50 (0.46 , 0.55) |
| 66.40 | 131 | 64 | 37 | 64 | 0.67 (0.64 , 0.70) | 0.63 (0.59 , 0.68) | 0.78 (0.75 , 0.81) | 0.50 (0.46 , 0.54) |

|       |     |    |    |    |                    |                    |                    |                    |
|-------|-----|----|----|----|--------------------|--------------------|--------------------|--------------------|
| 65.30 | 131 | 63 | 38 | 64 | 0.67 (0.64 , 0.70) | 0.62 (0.58 , 0.67) | 0.78 (0.75 , 0.80) | 0.50 (0.45 , 0.54) |
| 64.90 | 132 | 63 | 38 | 63 | 0.68 (0.65 , 0.71) | 0.62 (0.58 , 0.67) | 0.78 (0.75 , 0.80) | 0.50 (0.46 , 0.54) |
| 64.81 | 133 | 63 | 38 | 62 | 0.68 (0.65 , 0.71) | 0.62 (0.58 , 0.67) | 0.78 (0.75 , 0.80) | 0.50 (0.46 , 0.55) |
| 64.50 | 133 | 62 | 39 | 62 | 0.68 (0.65 , 0.71) | 0.61 (0.57 , 0.66) | 0.77 (0.75 , 0.80) | 0.50 (0.46 , 0.54) |
| 64.20 | 134 | 61 | 40 | 61 | 0.69 (0.66 , 0.72) | 0.60 (0.56 , 0.65) | 0.77 (0.74 , 0.80) | 0.50 (0.46 , 0.54) |
| 63.10 | 134 | 60 | 41 | 61 | 0.69 (0.66 , 0.72) | 0.59 (0.55 , 0.64) | 0.77 (0.74 , 0.79) | 0.50 (0.45 , 0.54) |
| 62.60 | 135 | 60 | 41 | 60 | 0.69 (0.66 , 0.72) | 0.59 (0.55 , 0.64) | 0.77 (0.74 , 0.79) | 0.50 (0.46 , 0.54) |
| 62.40 | 136 | 60 | 41 | 59 | 0.70 (0.67 , 0.73) | 0.59 (0.55 , 0.64) | 0.77 (0.74 , 0.79) | 0.50 (0.46 , 0.55) |
| 62.20 | 136 | 59 | 42 | 59 | 0.70 (0.67 , 0.73) | 0.58 (0.54 , 0.63) | 0.76 (0.74 , 0.79) | 0.50 (0.45 , 0.55) |
| 61.20 | 137 | 59 | 42 | 58 | 0.70 (0.67 , 0.73) | 0.58 (0.54 , 0.63) | 0.77 (0.74 , 0.79) | 0.50 (0.46 , 0.55) |
| 60.90 | 138 | 59 | 42 | 57 | 0.71 (0.68 , 0.74) | 0.58 (0.54 , 0.63) | 0.77 (0.74 , 0.79) | 0.51 (0.46 , 0.55) |
| 60.80 | 138 | 57 | 44 | 57 | 0.71 (0.68 , 0.74) | 0.56 (0.52 , 0.61) | 0.76 (0.73 , 0.78) | 0.50 (0.45 , 0.55) |
| 60.20 | 139 | 57 | 44 | 56 | 0.71 (0.68 , 0.74) | 0.56 (0.52 , 0.61) | 0.76 (0.73 , 0.79) | 0.50 (0.46 , 0.55) |
| 58.70 | 139 | 56 | 45 | 56 | 0.71 (0.68 , 0.74) | 0.55 (0.51 , 0.60) | 0.76 (0.73 , 0.78) | 0.50 (0.45 , 0.55) |
| 58.50 | 139 | 55 | 46 | 56 | 0.71 (0.68 , 0.74) | 0.54 (0.50 , 0.59) | 0.75 (0.72 , 0.78) | 0.50 (0.45 , 0.54) |
| 58.20 | 139 | 54 | 47 | 56 | 0.71 (0.68 , 0.74) | 0.53 (0.49 , 0.58) | 0.75 (0.72 , 0.77) | 0.49 (0.44 , 0.54) |
| 58.10 | 140 | 54 | 47 | 55 | 0.72 (0.69 , 0.75) | 0.53 (0.49 , 0.58) | 0.75 (0.72 , 0.78) | 0.50 (0.45 , 0.54) |
| 57.40 | 141 | 54 | 47 | 54 | 0.72 (0.69 , 0.75) | 0.53 (0.49 , 0.58) | 0.75 (0.72 , 0.78) | 0.50 (0.45 , 0.55) |
| 57.20 | 141 | 53 | 48 | 54 | 0.72 (0.69 , 0.75) | 0.52 (0.48 , 0.57) | 0.75 (0.72 , 0.77) | 0.50 (0.45 , 0.54) |
| 56.60 | 142 | 53 | 48 | 53 | 0.73 (0.70 , 0.76) | 0.52 (0.48 , 0.57) | 0.75 (0.72 , 0.77) | 0.50 (0.45 , 0.55) |
| 56.00 | 143 | 53 | 48 | 52 | 0.73 (0.71 , 0.76) | 0.52 (0.48 , 0.57) | 0.75 (0.72 , 0.78) | 0.50 (0.46 , 0.55) |
| 55.70 | 143 | 52 | 49 | 52 | 0.73 (0.71 , 0.76) | 0.51 (0.47 , 0.56) | 0.74 (0.72 , 0.77) | 0.50 (0.45 , 0.55) |

|       |     |    |    |    |                    |                    |                    |                    |
|-------|-----|----|----|----|--------------------|--------------------|--------------------|--------------------|
| 54.10 | 143 | 51 | 50 | 52 | 0.73 (0.71 , 0.76) | 0.50 (0.46 , 0.55) | 0.74 (0.71 , 0.77) | 0.50 (0.45 , 0.54) |
| 53.60 | 143 | 50 | 51 | 52 | 0.73 (0.71 , 0.76) | 0.50 (0.45 , 0.54) | 0.74 (0.71 , 0.76) | 0.49 (0.44 , 0.54) |
| 53.50 | 144 | 50 | 51 | 51 | 0.74 (0.71 , 0.77) | 0.50 (0.45 , 0.54) | 0.74 (0.71 , 0.77) | 0.50 (0.45 , 0.54) |
| 53.40 | 144 | 49 | 52 | 51 | 0.74 (0.71 , 0.77) | 0.49 (0.44 , 0.53) | 0.73 (0.71 , 0.76) | 0.49 (0.44 , 0.54) |
| 52.30 | 144 | 48 | 53 | 51 | 0.74 (0.71 , 0.77) | 0.48 (0.43 , 0.52) | 0.73 (0.70 , 0.76) | 0.48 (0.44 , 0.53) |
| 52.00 | 145 | 47 | 54 | 50 | 0.74 (0.72 , 0.77) | 0.47 (0.42 , 0.51) | 0.73 (0.70 , 0.76) | 0.48 (0.43 , 0.53) |
| 51.70 | 145 | 46 | 55 | 50 | 0.74 (0.72 , 0.77) | 0.46 (0.41 , 0.50) | 0.73 (0.70 , 0.75) | 0.48 (0.43 , 0.53) |
| 51.50 | 145 | 44 | 57 | 50 | 0.74 (0.72 , 0.77) | 0.44 (0.39 , 0.48) | 0.72 (0.69 , 0.75) | 0.47 (0.42 , 0.52) |
| 51.20 | 147 | 44 | 57 | 48 | 0.75 (0.73 , 0.78) | 0.44 (0.39 , 0.48) | 0.72 (0.69 , 0.75) | 0.48 (0.43 , 0.53) |
| 50.73 | 148 | 44 | 57 | 47 | 0.76 (0.73 , 0.78) | 0.44 (0.39 , 0.48) | 0.72 (0.69 , 0.75) | 0.48 (0.43 , 0.53) |
| 50.50 | 148 | 43 | 58 | 47 | 0.76 (0.73 , 0.78) | 0.43 (0.38 , 0.47) | 0.72 (0.69 , 0.75) | 0.48 (0.43 , 0.53) |
| 50.30 | 149 | 43 | 58 | 46 | 0.76 (0.74 , 0.79) | 0.43 (0.38 , 0.47) | 0.72 (0.69 , 0.75) | 0.48 (0.43 , 0.54) |
| 49.90 | 149 | 42 | 59 | 46 | 0.76 (0.74 , 0.79) | 0.42 (0.37 , 0.46) | 0.72 (0.69 , 0.74) | 0.48 (0.43 , 0.53) |
| 49.40 | 150 | 42 | 59 | 45 | 0.77 (0.74 , 0.79) | 0.42 (0.37 , 0.46) | 0.72 (0.69 , 0.75) | 0.48 (0.43 , 0.54) |
| 49.10 | 151 | 42 | 59 | 44 | 0.77 (0.75 , 0.80) | 0.42 (0.37 , 0.46) | 0.72 (0.69 , 0.75) | 0.49 (0.44 , 0.54) |
| 48.80 | 151 | 41 | 60 | 44 | 0.77 (0.75 , 0.80) | 0.41 (0.36 , 0.45) | 0.72 (0.69 , 0.74) | 0.48 (0.43 , 0.54) |
| 48.60 | 151 | 40 | 61 | 44 | 0.77 (0.75 , 0.80) | 0.40 (0.35 , 0.44) | 0.71 (0.68 , 0.74) | 0.48 (0.42 , 0.53) |
| 48.40 | 152 | 40 | 61 | 43 | 0.78 (0.76 , 0.80) | 0.40 (0.35 , 0.44) | 0.71 (0.69 , 0.74) | 0.48 (0.43 , 0.54) |
| 48.10 | 154 | 40 | 61 | 41 | 0.79 (0.77 , 0.81) | 0.40 (0.35 , 0.44) | 0.72 (0.69 , 0.74) | 0.49 (0.44 , 0.55) |
| 47.60 | 154 | 39 | 62 | 41 | 0.79 (0.77 , 0.81) | 0.39 (0.34 , 0.43) | 0.71 (0.69 , 0.74) | 0.49 (0.43 , 0.54) |
| 46.50 | 154 | 38 | 63 | 41 | 0.79 (0.77 , 0.81) | 0.38 (0.33 , 0.42) | 0.71 (0.68 , 0.74) | 0.48 (0.43 , 0.54) |
| 46.20 | 154 | 37 | 64 | 41 | 0.79 (0.77 , 0.81) | 0.37 (0.32 , 0.41) | 0.71 (0.68 , 0.73) | 0.47 (0.42 , 0.53) |



|       |     |    |    |    |                    |                    |                    |                    |
|-------|-----|----|----|----|--------------------|--------------------|--------------------|--------------------|
| 46.10 | 156 | 37 | 64 | 39 | 0.80 (0.78 , 0.82) | 0.37 (0.32 , 0.41) | 0.71 (0.68 , 0.74) | 0.49 (0.43 , 0.54) |
| 45.70 | 157 | 37 | 64 | 38 | 0.81 (0.78 , 0.83) | 0.37 (0.32 , 0.41) | 0.71 (0.68 , 0.74) | 0.49 (0.44 , 0.55) |
| 45.20 | 159 | 37 | 64 | 36 | 0.82 (0.79 , 0.84) | 0.37 (0.32 , 0.41) | 0.71 (0.69 , 0.74) | 0.51 (0.45 , 0.56) |
| 44.90 | 160 | 37 | 64 | 35 | 0.82 (0.80 , 0.84) | 0.37 (0.32 , 0.41) | 0.71 (0.69 , 0.74) | 0.51 (0.46 , 0.57) |
| 44.10 | 161 | 37 | 64 | 34 | 0.83 (0.81 , 0.85) | 0.37 (0.32 , 0.41) | 0.72 (0.69 , 0.74) | 0.52 (0.46 , 0.58) |
| 43.70 | 162 | 37 | 64 | 33 | 0.83 (0.81 , 0.85) | 0.37 (0.32 , 0.41) | 0.72 (0.69 , 0.74) | 0.53 (0.47 , 0.59) |
| 42.80 | 163 | 37 | 64 | 32 | 0.84 (0.82 , 0.86) | 0.37 (0.32 , 0.41) | 0.72 (0.69 , 0.74) | 0.54 (0.48 , 0.59) |
| 42.30 | 164 | 37 | 64 | 31 | 0.84 (0.82 , 0.86) | 0.37 (0.32 , 0.41) | 0.72 (0.69 , 0.75) | 0.54 (0.49 , 0.60) |
| 42.00 | 164 | 36 | 65 | 31 | 0.84 (0.82 , 0.86) | 0.36 (0.31 , 0.40) | 0.72 (0.69 , 0.74) | 0.54 (0.48 , 0.60) |
| 40.80 | 164 | 35 | 66 | 31 | 0.84 (0.82 , 0.86) | 0.35 (0.30 , 0.39) | 0.71 (0.69 , 0.74) | 0.53 (0.47 , 0.59) |
| 40.50 | 165 | 35 | 66 | 30 | 0.85 (0.83 , 0.86) | 0.35 (0.30 , 0.39) | 0.71 (0.69 , 0.74) | 0.54 (0.48 , 0.60) |
| 39.70 | 166 | 35 | 66 | 29 | 0.85 (0.83 , 0.87) | 0.35 (0.30 , 0.39) | 0.72 (0.69 , 0.74) | 0.55 (0.49 , 0.61) |
| 39.60 | 167 | 33 | 68 | 28 | 0.86 (0.84 , 0.87) | 0.33 (0.28 , 0.37) | 0.71 (0.68 , 0.74) | 0.54 (0.48 , 0.60) |
| 39.20 | 167 | 31 | 70 | 28 | 0.86 (0.84 , 0.87) | 0.31 (0.27 , 0.35) | 0.70 (0.68 , 0.73) | 0.53 (0.46 , 0.59) |
| 38.00 | 168 | 30 | 71 | 27 | 0.86 (0.84 , 0.88) | 0.30 (0.26 , 0.34) | 0.70 (0.68 , 0.73) | 0.53 (0.46 , 0.59) |
| 37.00 | 169 | 30 | 71 | 26 | 0.87 (0.85 , 0.88) | 0.30 (0.26 , 0.34) | 0.70 (0.68 , 0.73) | 0.54 (0.47 , 0.60) |
| 36.90 | 170 | 30 | 71 | 25 | 0.87 (0.86 , 0.89) | 0.30 (0.26 , 0.34) | 0.71 (0.68 , 0.73) | 0.55 (0.48 , 0.61) |
| 36.30 | 170 | 29 | 72 | 25 | 0.87 (0.86 , 0.89) | 0.29 (0.25 , 0.33) | 0.70 (0.68 , 0.73) | 0.54 (0.47 , 0.60) |
| 36.10 | 171 | 29 | 72 | 24 | 0.88 (0.86 , 0.89) | 0.29 (0.25 , 0.33) | 0.70 (0.68 , 0.73) | 0.55 (0.48 , 0.61) |
| 35.90 | 172 | 29 | 72 | 23 | 0.88 (0.87 , 0.90) | 0.29 (0.25 , 0.33) | 0.70 (0.68 , 0.73) | 0.56 (0.49 , 0.62) |
| 35.80 | 173 | 29 | 72 | 22 | 0.89 (0.87 , 0.90) | 0.29 (0.25 , 0.33) | 0.71 (0.68 , 0.73) | 0.57 (0.50 , 0.64) |
| 34.40 | 173 | 28 | 73 | 22 | 0.89 (0.87 , 0.90) | 0.28 (0.24 , 0.32) | 0.70 (0.68 , 0.73) | 0.56 (0.49 , 0.63) |

|       |     |    |    |    |                    |                    |                    |                    |
|-------|-----|----|----|----|--------------------|--------------------|--------------------|--------------------|
| 34.00 | 173 | 27 | 74 | 22 | 0.89 (0.87 , 0.90) | 0.27 (0.23 , 0.31) | 0.70 (0.67 , 0.73) | 0.55 (0.48 , 0.62) |
| 33.90 | 174 | 27 | 74 | 21 | 0.89 (0.88 , 0.91) | 0.27 (0.23 , 0.31) | 0.70 (0.68 , 0.73) | 0.56 (0.49 , 0.63) |
| 33.80 | 175 | 26 | 75 | 20 | 0.90 (0.88 , 0.91) | 0.26 (0.22 , 0.29) | 0.70 (0.67 , 0.73) | 0.57 (0.49 , 0.64) |
| 33.60 | 175 | 25 | 76 | 20 | 0.90 (0.88 , 0.91) | 0.25 (0.21 , 0.28) | 0.70 (0.67 , 0.72) | 0.56 (0.48 , 0.63) |
| 32.90 | 175 | 23 | 78 | 20 | 0.90 (0.88 , 0.91) | 0.23 (0.19 , 0.26) | 0.69 (0.67 , 0.72) | 0.53 (0.46 , 0.61) |
| 32.70 | 176 | 23 | 78 | 19 | 0.90 (0.89 , 0.91) | 0.23 (0.19 , 0.26) | 0.69 (0.67 , 0.72) | 0.55 (0.47 , 0.62) |
| 32.60 | 177 | 23 | 78 | 18 | 0.91 (0.90 , 0.92) | 0.23 (0.19 , 0.26) | 0.69 (0.67 , 0.72) | 0.56 (0.49 , 0.64) |
| 32.40 | 178 | 23 | 78 | 17 | 0.91 (0.90 , 0.92) | 0.23 (0.19 , 0.26) | 0.70 (0.67 , 0.72) | 0.58 (0.50 , 0.65) |
| 31.80 | 178 | 22 | 79 | 17 | 0.91 (0.90 , 0.92) | 0.22 (0.18 , 0.25) | 0.69 (0.67 , 0.72) | 0.56 (0.49 , 0.64) |
| 31.40 | 179 | 22 | 79 | 16 | 0.92 (0.91 , 0.93) | 0.22 (0.18 , 0.25) | 0.69 (0.67 , 0.72) | 0.58 (0.50 , 0.66) |
| 30.30 | 180 | 21 | 80 | 15 | 0.92 (0.91 , 0.93) | 0.21 (0.18 , 0.24) | 0.69 (0.67 , 0.72) | 0.58 (0.50 , 0.66) |
| 28.70 | 180 | 20 | 81 | 15 | 0.92 (0.91 , 0.93) | 0.20 (0.17 , 0.23) | 0.69 (0.66 , 0.72) | 0.57 (0.49 , 0.65) |
| 28.00 | 180 | 19 | 82 | 15 | 0.92 (0.91 , 0.93) | 0.19 (0.16 , 0.22) | 0.69 (0.66 , 0.71) | 0.56 (0.48 , 0.64) |
| 27.80 | 180 | 18 | 83 | 15 | 0.92 (0.91 , 0.93) | 0.18 (0.15 , 0.21) | 0.68 (0.66 , 0.71) | 0.55 (0.46 , 0.63) |
| 26.10 | 181 | 17 | 84 | 14 | 0.93 (0.92 , 0.94) | 0.17 (0.14 , 0.20) | 0.68 (0.66 , 0.71) | 0.55 (0.46 , 0.64) |
| 25.20 | 182 | 16 | 85 | 13 | 0.93 (0.92 , 0.94) | 0.16 (0.13 , 0.18) | 0.68 (0.66 , 0.71) | 0.55 (0.46 , 0.64) |
| 24.90 | 182 | 15 | 86 | 13 | 0.93 (0.92 , 0.94) | 0.15 (0.12 , 0.17) | 0.68 (0.65 , 0.71) | 0.54 (0.44 , 0.63) |
| 24.70 | 182 | 14 | 87 | 13 | 0.93 (0.92 , 0.94) | 0.14 (0.12 , 0.16) | 0.68 (0.65 , 0.70) | 0.52 (0.42 , 0.61) |
| 23.80 | 183 | 14 | 87 | 12 | 0.94 (0.93 , 0.95) | 0.14 (0.12 , 0.16) | 0.68 (0.65 , 0.70) | 0.54 (0.44 , 0.63) |
| 23.60 | 183 | 13 | 88 | 12 | 0.94 (0.93 , 0.95) | 0.13 (0.11 , 0.15) | 0.68 (0.65 , 0.70) | 0.52 (0.42 , 0.62) |
| 22.80 | 184 | 13 | 88 | 11 | 0.94 (0.94 , 0.95) | 0.13 (0.11 , 0.15) | 0.68 (0.65 , 0.70) | 0.54 (0.44 , 0.64) |
| 21.70 | 185 | 13 | 88 | 10 | 0.95 (0.94 , 0.96) | 0.13 (0.11 , 0.15) | 0.68 (0.65 , 0.70) | 0.57 (0.46 , 0.67) |

|       |     |    |     |   |                    |                    |                    |                    |
|-------|-----|----|-----|---|--------------------|--------------------|--------------------|--------------------|
| 20.50 | 186 | 13 | 88  | 9 | 0.95 (0.95 , 0.96) | 0.13 (0.11 , 0.15) | 0.68 (0.65 , 0.70) | 0.59 (0.49 , 0.69) |
| 19.60 | 187 | 13 | 88  | 8 | 0.96 (0.95 , 0.96) | 0.13 (0.11 , 0.15) | 0.68 (0.65 , 0.71) | 0.62 (0.52 , 0.72) |
| 19.40 | 188 | 12 | 89  | 7 | 0.96 (0.96 , 0.97) | 0.12 (0.10 , 0.14) | 0.68 (0.65 , 0.70) | 0.63 (0.53 , 0.74) |
| 18.80 | 188 | 11 | 90  | 7 | 0.96 (0.96 , 0.97) | 0.11 (0.09 , 0.13) | 0.68 (0.65 , 0.70) | 0.61 (0.50 , 0.72) |
| 17.40 | 188 | 9  | 92  | 7 | 0.96 (0.96 , 0.97) | 0.09 (0.07 , 0.10) | 0.67 (0.65 , 0.70) | 0.56 (0.44 , 0.68) |
| 15.10 | 189 | 9  | 92  | 6 | 0.97 (0.97 , 0.97) | 0.09 (0.07 , 0.10) | 0.67 (0.65 , 0.70) | 0.60 (0.48 , 0.72) |
| 14.40 | 189 | 8  | 93  | 6 | 0.97 (0.97 , 0.97) | 0.08 (0.06 , 0.09) | 0.67 (0.64 , 0.70) | 0.57 (0.44 , 0.70) |
| 11.40 | 190 | 8  | 93  | 5 | 0.97 (0.97 , 0.98) | 0.08 (0.06 , 0.09) | 0.67 (0.65 , 0.70) | 0.62 (0.49 , 0.74) |
| 8.80  | 192 | 8  | 93  | 3 | 0.98 (0.98 , 0.99) | 0.08 (0.06 , 0.09) | 0.67 (0.65 , 0.70) | 0.73 (0.61 , 0.84) |
| 8.40  | 192 | 7  | 94  | 3 | 0.98 (0.98 , 0.99) | 0.07 (0.06 , 0.08) | 0.67 (0.65 , 0.70) | 0.70 (0.57 , 0.83) |
| 8.30  | 192 | 6  | 95  | 3 | 0.98 (0.98 , 0.99) | 0.06 (0.05 , 0.07) | 0.67 (0.64 , 0.69) | 0.67 (0.52 , 0.81) |
| 8.15  | 193 | 6  | 95  | 2 | 0.99 (0.99 , 0.99) | 0.06 (0.05 , 0.07) | 0.67 (0.64 , 0.70) | 0.75 (0.62 , 0.88) |
| 6.90  | 193 | 5  | 96  | 2 | 0.99 (0.99 , 0.99) | 0.05 (0.04 , 0.06) | 0.67 (0.64 , 0.69) | 0.71 (0.56 , 0.87) |
| 6.87  | 194 | 5  | 96  | 1 | 0.99 (0.99 , 1.00) | 0.05 (0.04 , 0.06) | 0.67 (0.64 , 0.69) | 0.83 (0.72 , 0.94) |
| 4.70  | 194 | 4  | 97  | 1 | 0.99 (0.99 , 1.00) | 0.04 (0.03 , 0.05) | 0.67 (0.64 , 0.69) | 0.80 (0.66 , 0.94) |
| 1.00  | 195 | 4  | 97  | 0 | 1.00 (1.00 , 1.00) | 0.04 (0.03 , 0.05) | 0.67 (0.64 , 0.69) | 1.00 (1.00 , 1.00) |
| 0.95  | 195 | 3  | 98  | 0 | 1.00 (1.00 , 1.00) | 0.03 (0.02 , 0.04) | 0.67 (0.64 , 0.69) | 1.00 (1.00 , 1.00) |
| 0.90  | 195 | 2  | 99  | 0 | 1.00 (1.00 , 1.00) | 0.02 (0.02 , 0.02) | 0.66 (0.64 , 0.69) | 1.00 (1.00 , 1.00) |
| 0.50  | 195 | 0  | 101 | 0 | 1.00 (1.00 , 1.00) | 0.00 (0.00 , 0.00) | 0.66 (0.63 , 0.68) | ( , )              |

4  
5

6 Supplemental Table 2. Sensitivity, specificity, positive predictive value, and negative predictive value, along with 95%  
 7 confidence intervals, for all observed model counts in combined MC and LUMC data set. CCM, Time 3.

| CC<br>M<br>score | No. of<br>Correctly<br>Predicted<br>Events | No. of<br>Correctly<br>Predicted<br>Nonevents | No. of<br>Nonevents<br>Predicted<br>as<br>Events | No. of<br>Events<br>Predicted<br>as<br>Nonevents | Sensitivity<br>(95% CI) | Specificity<br>(95% CI) | Positive<br>predictive<br>value (95%<br>CI) | Negative<br>predictive<br>value (95%<br>CI) |
|------------------|--------------------------------------------|-----------------------------------------------|--------------------------------------------------|--------------------------------------------------|-------------------------|-------------------------|---------------------------------------------|---------------------------------------------|
| 97.70            | 0                                          | 100                                           | 1                                                | 195                                              | 0.00 (0.00 , 0.00)      | 0.99 (0.99 , 0.99)      | 0.00 (0.00 , 0.00)                          | 0.34 (0.31 , 0.36)                          |
| 97.00            | 1                                          | 100                                           | 1                                                | 194                                              | 0.01 (0.00 , 0.01)      | 0.99 (0.99 , 0.99)      | 0.50 (0.15 , 0.85)                          | 0.34 (0.31 , 0.37)                          |
| 96.90            | 4                                          | 100                                           | 1                                                | 191                                              | 0.02 (0.02 , 0.02)      | 0.99 (0.99 , 0.99)      | 0.80 (0.66 , 0.94)                          | 0.34 (0.32 , 0.37)                          |
| 96.70            | 6                                          | 100                                           | 1                                                | 189                                              | 0.03 (0.03 , 0.03)      | 0.99 (0.99 , 0.99)      | 0.86 (0.77 , 0.95)                          | 0.35 (0.32 , 0.37)                          |
| 96.20            | 6                                          | 99                                            | 2                                                | 189                                              | 0.03 (0.03 , 0.03)      | 0.98 (0.98 , 0.98)      | 0.75 (0.62 , 0.88)                          | 0.34 (0.32 , 0.37)                          |
| 95.60            | 7                                          | 99                                            | 2                                                | 188                                              | 0.04 (0.03 , 0.04)      | 0.98 (0.98 , 0.98)      | 0.78 (0.66 , 0.89)                          | 0.34 (0.32 , 0.37)                          |
| 95.30            | 8                                          | 99                                            | 2                                                | 187                                              | 0.04 (0.04 , 0.05)      | 0.98 (0.98 , 0.98)      | 0.80 (0.70 , 0.90)                          | 0.35 (0.32 , 0.37)                          |
| 94.70            | 10                                         | 98                                            | 3                                                | 185                                              | 0.05 (0.04 , 0.06)      | 0.97 (0.96 , 0.98)      | 0.77 (0.67 , 0.87)                          | 0.35 (0.32 , 0.37)                          |
| 94.60            | 11                                         | 98                                            | 3                                                | 184                                              | 0.06 (0.05 , 0.06)      | 0.97 (0.96 , 0.98)      | 0.79 (0.70 , 0.87)                          | 0.35 (0.32 , 0.37)                          |
| 94.30            | 12                                         | 98                                            | 3                                                | 183                                              | 0.06 (0.05 , 0.07)      | 0.97 (0.96 , 0.98)      | 0.80 (0.72 , 0.88)                          | 0.35 (0.32 , 0.38)                          |
| 94.20            | 13                                         | 98                                            | 3                                                | 182                                              | 0.07 (0.06 , 0.08)      | 0.97 (0.96 , 0.98)      | 0.81 (0.74 , 0.89)                          | 0.35 (0.32 , 0.38)                          |
| 93.80            | 14                                         | 98                                            | 3                                                | 181                                              | 0.07 (0.06 , 0.08)      | 0.97 (0.96 , 0.98)      | 0.82 (0.75 , 0.89)                          | 0.35 (0.32 , 0.38)                          |
| 93.60            | 18                                         | 98                                            | 3                                                | 177                                              | 0.09 (0.08 , 0.10)      | 0.97 (0.96 , 0.98)      | 0.86 (0.80 , 0.91)                          | 0.36 (0.33 , 0.38)                          |
| 93.30            | 19                                         | 98                                            | 3                                                | 176                                              | 0.10 (0.09 , 0.11)      | 0.97 (0.96 , 0.98)      | 0.86 (0.81 , 0.91)                          | 0.36 (0.33 , 0.38)                          |
| 93.20            | 20                                         | 98                                            | 3                                                | 175                                              | 0.10 (0.09 , 0.12)      | 0.97 (0.96 , 0.98)      | 0.87 (0.82 , 0.92)                          | 0.36 (0.33 , 0.39)                          |
| 92.60            | 22                                         | 98                                            | 3                                                | 173                                              | 0.11 (0.10 , 0.13)      | 0.97 (0.96 , 0.98)      | 0.88 (0.84 , 0.92)                          | 0.36 (0.33 , 0.39)                          |
| 92.50            | 23                                         | 98                                            | 3                                                | 172                                              | 0.12 (0.10 , 0.13)      | 0.97 (0.96 , 0.98)      | 0.88 (0.85 , 0.92)                          | 0.36 (0.34 , 0.39)                          |

|       |    |    |    |     |                    |                    |                    |                    |
|-------|----|----|----|-----|--------------------|--------------------|--------------------|--------------------|
| 92.40 | 24 | 98 | 3  | 171 | 0.12 (0.11 , 0.14) | 0.97 (0.96 , 0.98) | 0.89 (0.85 , 0.93) | 0.36 (0.34 , 0.39) |
| 92.30 | 26 | 97 | 4  | 169 | 0.13 (0.12 , 0.15) | 0.96 (0.95 , 0.97) | 0.87 (0.83 , 0.91) | 0.36 (0.34 , 0.39) |
| 92.00 | 27 | 97 | 4  | 168 | 0.14 (0.12 , 0.16) | 0.96 (0.95 , 0.97) | 0.87 (0.83 , 0.91) | 0.37 (0.34 , 0.39) |
| 91.30 | 29 | 97 | 4  | 166 | 0.15 (0.13 , 0.17) | 0.96 (0.95 , 0.97) | 0.88 (0.84 , 0.92) | 0.37 (0.34 , 0.40) |
| 91.00 | 30 | 97 | 4  | 165 | 0.15 (0.14 , 0.17) | 0.96 (0.95 , 0.97) | 0.88 (0.85 , 0.92) | 0.37 (0.34 , 0.40) |
| 90.90 | 31 | 96 | 5  | 164 | 0.16 (0.14 , 0.18) | 0.95 (0.94 , 0.96) | 0.86 (0.82 , 0.90) | 0.37 (0.34 , 0.40) |
| 90.40 | 32 | 96 | 5  | 163 | 0.16 (0.14 , 0.18) | 0.95 (0.94 , 0.96) | 0.86 (0.83 , 0.90) | 0.37 (0.34 , 0.40) |
| 90.20 | 33 | 96 | 5  | 162 | 0.17 (0.15 , 0.19) | 0.95 (0.94 , 0.96) | 0.87 (0.83 , 0.90) | 0.37 (0.34 , 0.40) |
| 90.10 | 35 | 96 | 5  | 160 | 0.18 (0.16 , 0.20) | 0.95 (0.94 , 0.96) | 0.88 (0.84 , 0.91) | 0.38 (0.35 , 0.40) |
| 89.70 | 35 | 95 | 6  | 160 | 0.18 (0.16 , 0.20) | 0.94 (0.93 , 0.95) | 0.85 (0.82 , 0.89) | 0.37 (0.34 , 0.40) |
| 89.30 | 35 | 94 | 7  | 160 | 0.18 (0.16 , 0.20) | 0.93 (0.92 , 0.94) | 0.83 (0.79 , 0.88) | 0.37 (0.34 , 0.40) |
| 89.10 | 36 | 94 | 7  | 159 | 0.18 (0.16 , 0.21) | 0.93 (0.92 , 0.94) | 0.84 (0.80 , 0.88) | 0.37 (0.34 , 0.40) |
| 88.70 | 37 | 93 | 8  | 158 | 0.19 (0.17 , 0.21) | 0.92 (0.91 , 0.94) | 0.82 (0.78 , 0.86) | 0.37 (0.34 , 0.40) |
| 88.60 | 38 | 93 | 8  | 157 | 0.19 (0.17 , 0.22) | 0.92 (0.91 , 0.94) | 0.83 (0.78 , 0.87) | 0.37 (0.34 , 0.40) |
| 88.50 | 40 | 93 | 8  | 155 | 0.21 (0.18 , 0.23) | 0.92 (0.91 , 0.94) | 0.83 (0.79 , 0.87) | 0.38 (0.35 , 0.40) |
| 87.80 | 42 | 92 | 9  | 153 | 0.22 (0.19 , 0.24) | 0.91 (0.90 , 0.93) | 0.82 (0.78 , 0.86) | 0.38 (0.35 , 0.40) |
| 87.70 | 44 | 92 | 9  | 151 | 0.23 (0.20 , 0.25) | 0.91 (0.90 , 0.93) | 0.83 (0.79 , 0.87) | 0.38 (0.35 , 0.41) |
| 87.60 | 45 | 92 | 9  | 150 | 0.23 (0.21 , 0.26) | 0.91 (0.90 , 0.93) | 0.83 (0.80 , 0.87) | 0.38 (0.35 , 0.41) |
| 87.20 | 45 | 91 | 10 | 150 | 0.23 (0.21 , 0.26) | 0.90 (0.88 , 0.92) | 0.82 (0.78 , 0.86) | 0.38 (0.35 , 0.41) |
| 86.90 | 46 | 91 | 10 | 149 | 0.24 (0.21 , 0.26) | 0.90 (0.88 , 0.92) | 0.82 (0.78 , 0.86) | 0.38 (0.35 , 0.41) |
| 86.10 | 47 | 91 | 10 | 148 | 0.24 (0.22 , 0.27) | 0.90 (0.88 , 0.92) | 0.82 (0.79 , 0.86) | 0.38 (0.35 , 0.41) |
| 85.90 | 50 | 91 | 10 | 145 | 0.26 (0.23 , 0.28) | 0.90 (0.88 , 0.92) | 0.83 (0.80 , 0.87) | 0.39 (0.36 , 0.42) |

|       |    |    |    |     |                    |                    |                    |                    |
|-------|----|----|----|-----|--------------------|--------------------|--------------------|--------------------|
| 85.80 | 52 | 91 | 10 | 143 | 0.27 (0.24 , 0.29) | 0.90 (0.88 , 0.92) | 0.84 (0.81 , 0.87) | 0.39 (0.36 , 0.42) |
| 85.60 | 54 | 91 | 10 | 141 | 0.28 (0.25 , 0.31) | 0.90 (0.88 , 0.92) | 0.84 (0.81 , 0.88) | 0.39 (0.36 , 0.42) |
| 85.30 | 55 | 91 | 10 | 140 | 0.28 (0.25 , 0.31) | 0.90 (0.88 , 0.92) | 0.85 (0.81 , 0.88) | 0.39 (0.36 , 0.42) |
| 84.80 | 57 | 91 | 10 | 138 | 0.29 (0.26 , 0.32) | 0.90 (0.88 , 0.92) | 0.85 (0.82 , 0.88) | 0.40 (0.37 , 0.43) |
| 84.70 | 60 | 91 | 10 | 135 | 0.31 (0.28 , 0.34) | 0.90 (0.88 , 0.92) | 0.86 (0.83 , 0.89) | 0.40 (0.37 , 0.43) |
| 84.60 | 62 | 90 | 11 | 133 | 0.32 (0.29 , 0.35) | 0.89 (0.87 , 0.91) | 0.85 (0.82 , 0.88) | 0.40 (0.37 , 0.44) |
| 84.30 | 63 | 90 | 11 | 132 | 0.32 (0.29 , 0.35) | 0.89 (0.87 , 0.91) | 0.85 (0.82 , 0.88) | 0.41 (0.37 , 0.44) |
| 84.20 | 64 | 90 | 11 | 131 | 0.33 (0.30 , 0.36) | 0.89 (0.87 , 0.91) | 0.85 (0.83 , 0.88) | 0.41 (0.38 , 0.44) |
| 83.90 | 64 | 89 | 12 | 131 | 0.33 (0.30 , 0.36) | 0.88 (0.86 , 0.90) | 0.84 (0.81 , 0.87) | 0.40 (0.37 , 0.44) |
| 83.80 | 67 | 89 | 12 | 128 | 0.34 (0.31 , 0.38) | 0.88 (0.86 , 0.90) | 0.85 (0.82 , 0.88) | 0.41 (0.38 , 0.44) |
| 83.60 | 68 | 89 | 12 | 127 | 0.35 (0.32 , 0.38) | 0.88 (0.86 , 0.90) | 0.85 (0.82 , 0.88) | 0.41 (0.38 , 0.44) |
| 83.50 | 71 | 89 | 12 | 124 | 0.36 (0.33 , 0.40) | 0.88 (0.86 , 0.90) | 0.86 (0.83 , 0.88) | 0.42 (0.39 , 0.45) |
| 83.40 | 72 | 89 | 12 | 123 | 0.37 (0.34 , 0.40) | 0.88 (0.86 , 0.90) | 0.86 (0.83 , 0.88) | 0.42 (0.39 , 0.45) |
| 83.20 | 73 | 89 | 12 | 122 | 0.37 (0.34 , 0.41) | 0.88 (0.86 , 0.90) | 0.86 (0.83 , 0.88) | 0.42 (0.39 , 0.45) |
| 83.10 | 74 | 89 | 12 | 121 | 0.38 (0.35 , 0.41) | 0.88 (0.86 , 0.90) | 0.86 (0.84 , 0.89) | 0.42 (0.39 , 0.46) |
| 82.80 | 77 | 89 | 12 | 118 | 0.39 (0.36 , 0.43) | 0.88 (0.86 , 0.90) | 0.87 (0.84 , 0.89) | 0.43 (0.40 , 0.46) |
| 82.70 | 79 | 89 | 12 | 116 | 0.41 (0.37 , 0.44) | 0.88 (0.86 , 0.90) | 0.87 (0.84 , 0.89) | 0.43 (0.40 , 0.47) |
| 82.64 | 80 | 89 | 12 | 115 | 0.41 (0.38 , 0.44) | 0.88 (0.86 , 0.90) | 0.87 (0.85 , 0.89) | 0.44 (0.40 , 0.47) |
| 82.40 | 82 | 88 | 13 | 113 | 0.42 (0.39 , 0.45) | 0.87 (0.85 , 0.89) | 0.86 (0.84 , 0.89) | 0.44 (0.40 , 0.47) |
| 82.30 | 83 | 88 | 13 | 112 | 0.43 (0.39 , 0.46) | 0.87 (0.85 , 0.89) | 0.86 (0.84 , 0.89) | 0.44 (0.41 , 0.47) |
| 82.20 | 84 | 88 | 13 | 111 | 0.43 (0.40 , 0.47) | 0.87 (0.85 , 0.89) | 0.87 (0.84 , 0.89) | 0.44 (0.41 , 0.48) |
| 81.90 | 87 | 88 | 13 | 108 | 0.45 (0.41 , 0.48) | 0.87 (0.85 , 0.89) | 0.87 (0.85 , 0.89) | 0.45 (0.41 , 0.48) |

|       |     |    |    |     |                    |                    |                    |                    |
|-------|-----|----|----|-----|--------------------|--------------------|--------------------|--------------------|
| 81.80 | 87  | 86 | 15 | 108 | 0.45 (0.41 , 0.48) | 0.85 (0.83 , 0.88) | 0.85 (0.83 , 0.88) | 0.44 (0.41 , 0.48) |
| 81.70 | 89  | 86 | 15 | 106 | 0.46 (0.42 , 0.49) | 0.85 (0.83 , 0.88) | 0.86 (0.83 , 0.88) | 0.45 (0.41 , 0.48) |
| 81.60 | 90  | 86 | 15 | 105 | 0.46 (0.43 , 0.50) | 0.85 (0.83 , 0.88) | 0.86 (0.83 , 0.88) | 0.45 (0.42 , 0.49) |
| 81.00 | 90  | 85 | 16 | 105 | 0.46 (0.43 , 0.50) | 0.84 (0.82 , 0.87) | 0.85 (0.82 , 0.87) | 0.45 (0.41 , 0.48) |
| 80.80 | 91  | 85 | 16 | 104 | 0.47 (0.43 , 0.50) | 0.84 (0.82 , 0.87) | 0.85 (0.83 , 0.87) | 0.45 (0.41 , 0.49) |
| 80.50 | 92  | 85 | 16 | 103 | 0.47 (0.44 , 0.51) | 0.84 (0.82 , 0.87) | 0.85 (0.83 , 0.88) | 0.45 (0.42 , 0.49) |
| 80.30 | 94  | 85 | 16 | 101 | 0.48 (0.45 , 0.52) | 0.84 (0.82 , 0.87) | 0.85 (0.83 , 0.88) | 0.46 (0.42 , 0.49) |
| 80.10 | 95  | 85 | 16 | 100 | 0.49 (0.45 , 0.52) | 0.84 (0.82 , 0.87) | 0.86 (0.83 , 0.88) | 0.46 (0.42 , 0.50) |
| 79.70 | 96  | 85 | 16 | 99  | 0.49 (0.46 , 0.53) | 0.84 (0.82 , 0.87) | 0.86 (0.83 , 0.88) | 0.46 (0.43 , 0.50) |
| 79.60 | 97  | 85 | 16 | 98  | 0.50 (0.46 , 0.53) | 0.84 (0.82 , 0.87) | 0.86 (0.84 , 0.88) | 0.46 (0.43 , 0.50) |
| 79.20 | 99  | 84 | 17 | 96  | 0.51 (0.47 , 0.54) | 0.83 (0.80 , 0.86) | 0.85 (0.83 , 0.88) | 0.47 (0.43 , 0.50) |
| 78.90 | 100 | 84 | 17 | 95  | 0.51 (0.48 , 0.55) | 0.83 (0.80 , 0.86) | 0.85 (0.83 , 0.88) | 0.47 (0.43 , 0.51) |
| 78.70 | 100 | 83 | 18 | 95  | 0.51 (0.48 , 0.55) | 0.82 (0.79 , 0.85) | 0.85 (0.82 , 0.87) | 0.47 (0.43 , 0.50) |
| 78.50 | 100 | 82 | 19 | 95  | 0.51 (0.48 , 0.55) | 0.81 (0.78 , 0.84) | 0.84 (0.82 , 0.86) | 0.46 (0.43 , 0.50) |
| 78.40 | 101 | 82 | 19 | 94  | 0.52 (0.48 , 0.55) | 0.81 (0.78 , 0.84) | 0.84 (0.82 , 0.87) | 0.47 (0.43 , 0.50) |
| 78.20 | 101 | 81 | 20 | 94  | 0.52 (0.48 , 0.55) | 0.80 (0.77 , 0.83) | 0.83 (0.81 , 0.86) | 0.46 (0.43 , 0.50) |
| 77.70 | 102 | 81 | 20 | 93  | 0.52 (0.49 , 0.56) | 0.80 (0.77 , 0.83) | 0.84 (0.81 , 0.86) | 0.47 (0.43 , 0.50) |
| 77.50 | 103 | 81 | 20 | 92  | 0.53 (0.49 , 0.56) | 0.80 (0.77 , 0.83) | 0.84 (0.81 , 0.86) | 0.47 (0.43 , 0.51) |
| 77.20 | 104 | 80 | 21 | 91  | 0.53 (0.50 , 0.57) | 0.79 (0.76 , 0.82) | 0.83 (0.81 , 0.86) | 0.47 (0.43 , 0.51) |
| 77.10 | 105 | 80 | 21 | 90  | 0.54 (0.50 , 0.57) | 0.79 (0.76 , 0.82) | 0.83 (0.81 , 0.86) | 0.47 (0.43 , 0.51) |
| 76.80 | 105 | 79 | 22 | 90  | 0.54 (0.50 , 0.57) | 0.78 (0.75 , 0.82) | 0.83 (0.80 , 0.85) | 0.47 (0.43 , 0.50) |
| 76.70 | 106 | 79 | 22 | 89  | 0.54 (0.51 , 0.58) | 0.78 (0.75 , 0.82) | 0.83 (0.80 , 0.85) | 0.47 (0.43 , 0.51) |

|       |     |    |    |    |                    |                    |                    |                    |
|-------|-----|----|----|----|--------------------|--------------------|--------------------|--------------------|
| 76.40 | 107 | 78 | 23 | 88 | 0.55 (0.51 , 0.58) | 0.77 (0.74 , 0.81) | 0.82 (0.80 , 0.85) | 0.47 (0.43 , 0.51) |
| 76.20 | 108 | 78 | 23 | 87 | 0.55 (0.52 , 0.59) | 0.77 (0.74 , 0.81) | 0.82 (0.80 , 0.85) | 0.47 (0.43 , 0.51) |
| 76.00 | 108 | 77 | 24 | 87 | 0.55 (0.52 , 0.59) | 0.76 (0.73 , 0.80) | 0.82 (0.79 , 0.84) | 0.47 (0.43 , 0.51) |
| 75.80 | 108 | 76 | 25 | 87 | 0.55 (0.52 , 0.59) | 0.75 (0.72 , 0.79) | 0.81 (0.79 , 0.84) | 0.47 (0.43 , 0.50) |
| 75.60 | 108 | 75 | 26 | 87 | 0.55 (0.52 , 0.59) | 0.74 (0.71 , 0.78) | 0.81 (0.78 , 0.83) | 0.46 (0.42 , 0.50) |
| 75.30 | 109 | 75 | 26 | 86 | 0.56 (0.52 , 0.59) | 0.74 (0.71 , 0.78) | 0.81 (0.78 , 0.83) | 0.47 (0.43 , 0.50) |
| 75.00 | 111 | 75 | 26 | 84 | 0.57 (0.53 , 0.60) | 0.74 (0.71 , 0.78) | 0.81 (0.78 , 0.84) | 0.47 (0.43 , 0.51) |
| 74.10 | 113 | 75 | 26 | 82 | 0.58 (0.55 , 0.61) | 0.74 (0.71 , 0.78) | 0.81 (0.79 , 0.84) | 0.48 (0.44 , 0.52) |
| 73.70 | 113 | 74 | 27 | 82 | 0.58 (0.55 , 0.61) | 0.73 (0.69 , 0.77) | 0.81 (0.78 , 0.83) | 0.47 (0.44 , 0.51) |
| 73.50 | 113 | 73 | 28 | 82 | 0.58 (0.55 , 0.61) | 0.72 (0.68 , 0.76) | 0.80 (0.78 , 0.83) | 0.47 (0.43 , 0.51) |
| 73.10 | 114 | 73 | 28 | 81 | 0.58 (0.55 , 0.62) | 0.72 (0.68 , 0.76) | 0.80 (0.78 , 0.83) | 0.47 (0.43 , 0.51) |
| 72.90 | 115 | 73 | 28 | 80 | 0.59 (0.56 , 0.62) | 0.72 (0.68 , 0.76) | 0.80 (0.78 , 0.83) | 0.48 (0.44 , 0.52) |
| 72.52 | 116 | 73 | 28 | 79 | 0.59 (0.56 , 0.63) | 0.72 (0.68 , 0.76) | 0.81 (0.78 , 0.83) | 0.48 (0.44 , 0.52) |
| 72.20 | 117 | 73 | 28 | 78 | 0.60 (0.57 , 0.63) | 0.72 (0.68 , 0.76) | 0.81 (0.78 , 0.83) | 0.48 (0.44 , 0.52) |
| 71.90 | 118 | 73 | 28 | 77 | 0.61 (0.57 , 0.64) | 0.72 (0.68 , 0.76) | 0.81 (0.78 , 0.83) | 0.49 (0.45 , 0.53) |
| 71.85 | 119 | 73 | 28 | 76 | 0.61 (0.58 , 0.64) | 0.72 (0.68 , 0.76) | 0.81 (0.78 , 0.83) | 0.49 (0.45 , 0.53) |
| 71.80 | 120 | 73 | 28 | 75 | 0.62 (0.58 , 0.65) | 0.72 (0.68 , 0.76) | 0.81 (0.79 , 0.84) | 0.49 (0.45 , 0.53) |
| 71.60 | 121 | 73 | 28 | 74 | 0.62 (0.59 , 0.65) | 0.72 (0.68 , 0.76) | 0.81 (0.79 , 0.84) | 0.50 (0.46 , 0.54) |
| 71.00 | 121 | 72 | 29 | 74 | 0.62 (0.59 , 0.65) | 0.71 (0.67 , 0.75) | 0.81 (0.78 , 0.83) | 0.49 (0.45 , 0.53) |
| 70.90 | 122 | 72 | 29 | 73 | 0.63 (0.59 , 0.66) | 0.71 (0.67 , 0.75) | 0.81 (0.78 , 0.83) | 0.50 (0.46 , 0.54) |
| 70.10 | 123 | 72 | 29 | 72 | 0.63 (0.60 , 0.66) | 0.71 (0.67 , 0.75) | 0.81 (0.78 , 0.83) | 0.50 (0.46 , 0.54) |
| 69.60 | 124 | 72 | 29 | 71 | 0.64 (0.60 , 0.67) | 0.71 (0.67 , 0.75) | 0.81 (0.79 , 0.83) | 0.50 (0.46 , 0.54) |



|       |     |    |    |    |                    |                    |                    |                    |
|-------|-----|----|----|----|--------------------|--------------------|--------------------|--------------------|
| 69.40 | 124 | 71 | 30 | 71 | 0.64 (0.60 , 0.67) | 0.70 (0.66 , 0.74) | 0.81 (0.78 , 0.83) | 0.50 (0.46 , 0.54) |
| 69.20 | 125 | 71 | 30 | 70 | 0.64 (0.61 , 0.67) | 0.70 (0.66 , 0.74) | 0.81 (0.78 , 0.83) | 0.50 (0.46 , 0.54) |
| 69.00 | 126 | 71 | 30 | 69 | 0.65 (0.61 , 0.68) | 0.70 (0.66 , 0.74) | 0.81 (0.78 , 0.83) | 0.51 (0.47 , 0.55) |
| 68.80 | 127 | 71 | 30 | 68 | 0.65 (0.62 , 0.68) | 0.70 (0.66 , 0.74) | 0.81 (0.78 , 0.83) | 0.51 (0.47 , 0.55) |
| 68.60 | 128 | 71 | 30 | 67 | 0.66 (0.62 , 0.69) | 0.70 (0.66 , 0.74) | 0.81 (0.79 , 0.83) | 0.51 (0.47 , 0.56) |
| 68.40 | 129 | 71 | 30 | 66 | 0.66 (0.63 , 0.69) | 0.70 (0.66 , 0.74) | 0.81 (0.79 , 0.84) | 0.52 (0.48 , 0.56) |
| 68.30 | 130 | 71 | 30 | 65 | 0.67 (0.64 , 0.70) | 0.70 (0.66 , 0.74) | 0.81 (0.79 , 0.84) | 0.52 (0.48 , 0.56) |
| 68.20 | 131 | 71 | 30 | 64 | 0.67 (0.64 , 0.70) | 0.70 (0.66 , 0.74) | 0.81 (0.79 , 0.84) | 0.53 (0.48 , 0.57) |
| 67.00 | 133 | 71 | 30 | 62 | 0.68 (0.65 , 0.71) | 0.70 (0.66 , 0.74) | 0.82 (0.79 , 0.84) | 0.53 (0.49 , 0.58) |
| 66.50 | 134 | 71 | 30 | 61 | 0.69 (0.66 , 0.72) | 0.70 (0.66 , 0.74) | 0.82 (0.79 , 0.84) | 0.54 (0.50 , 0.58) |
| 66.40 | 135 | 71 | 30 | 60 | 0.69 (0.66 , 0.72) | 0.70 (0.66 , 0.74) | 0.82 (0.80 , 0.84) | 0.54 (0.50 , 0.58) |
| 66.10 | 135 | 70 | 31 | 60 | 0.69 (0.66 , 0.72) | 0.69 (0.65 , 0.73) | 0.81 (0.79 , 0.84) | 0.54 (0.50 , 0.58) |
| 65.90 | 136 | 70 | 31 | 59 | 0.70 (0.67 , 0.73) | 0.69 (0.65 , 0.73) | 0.81 (0.79 , 0.84) | 0.54 (0.50 , 0.59) |
| 65.60 | 137 | 70 | 31 | 58 | 0.70 (0.67 , 0.73) | 0.69 (0.65 , 0.73) | 0.82 (0.79 , 0.84) | 0.55 (0.50 , 0.59) |
| 65.30 | 137 | 69 | 32 | 58 | 0.70 (0.67 , 0.73) | 0.68 (0.64 , 0.73) | 0.81 (0.79 , 0.83) | 0.54 (0.50 , 0.59) |
| 64.90 | 138 | 69 | 32 | 57 | 0.71 (0.68 , 0.74) | 0.68 (0.64 , 0.73) | 0.81 (0.79 , 0.83) | 0.55 (0.50 , 0.59) |
| 64.81 | 139 | 69 | 32 | 56 | 0.71 (0.68 , 0.74) | 0.68 (0.64 , 0.73) | 0.81 (0.79 , 0.84) | 0.55 (0.51 , 0.60) |
| 64.60 | 140 | 69 | 32 | 55 | 0.72 (0.69 , 0.75) | 0.68 (0.64 , 0.73) | 0.81 (0.79 , 0.84) | 0.56 (0.51 , 0.60) |
| 64.50 | 140 | 68 | 33 | 55 | 0.72 (0.69 , 0.75) | 0.67 (0.63 , 0.72) | 0.81 (0.79 , 0.83) | 0.55 (0.51 , 0.60) |
| 64.40 | 140 | 67 | 34 | 55 | 0.72 (0.69 , 0.75) | 0.66 (0.62 , 0.71) | 0.80 (0.78 , 0.83) | 0.55 (0.51 , 0.59) |
| 64.20 | 140 | 66 | 35 | 55 | 0.72 (0.69 , 0.75) | 0.65 (0.61 , 0.70) | 0.80 (0.78 , 0.82) | 0.55 (0.50 , 0.59) |
| 63.10 | 140 | 65 | 36 | 55 | 0.72 (0.69 , 0.75) | 0.64 (0.60 , 0.69) | 0.80 (0.77 , 0.82) | 0.54 (0.50 , 0.59) |

|       |     |    |    |    |                    |                    |                    |                    |
|-------|-----|----|----|----|--------------------|--------------------|--------------------|--------------------|
| 62.80 | 141 | 65 | 36 | 54 | 0.72 (0.69 , 0.75) | 0.64 (0.60 , 0.69) | 0.80 (0.77 , 0.82) | 0.55 (0.50 , 0.59) |
| 62.60 | 142 | 65 | 36 | 53 | 0.73 (0.70 , 0.76) | 0.64 (0.60 , 0.69) | 0.80 (0.77 , 0.82) | 0.55 (0.51 , 0.60) |
| 62.40 | 143 | 65 | 36 | 52 | 0.73 (0.71 , 0.76) | 0.64 (0.60 , 0.69) | 0.80 (0.78 , 0.82) | 0.56 (0.51 , 0.60) |
| 62.20 | 143 | 64 | 37 | 52 | 0.73 (0.71 , 0.76) | 0.63 (0.59 , 0.68) | 0.79 (0.77 , 0.82) | 0.55 (0.51 , 0.60) |
| 61.70 | 144 | 64 | 37 | 51 | 0.74 (0.71 , 0.77) | 0.63 (0.59 , 0.68) | 0.80 (0.77 , 0.82) | 0.56 (0.51 , 0.60) |
| 61.20 | 145 | 64 | 37 | 50 | 0.74 (0.72 , 0.77) | 0.63 (0.59 , 0.68) | 0.80 (0.77 , 0.82) | 0.56 (0.52 , 0.61) |
| 60.80 | 145 | 61 | 40 | 50 | 0.74 (0.72 , 0.77) | 0.60 (0.56 , 0.65) | 0.78 (0.76 , 0.81) | 0.55 (0.50 , 0.60) |
| 60.70 | 146 | 60 | 41 | 49 | 0.75 (0.72 , 0.78) | 0.59 (0.55 , 0.64) | 0.78 (0.76 , 0.81) | 0.55 (0.50 , 0.60) |
| 60.40 | 147 | 60 | 41 | 48 | 0.75 (0.73 , 0.78) | 0.59 (0.55 , 0.64) | 0.78 (0.76 , 0.81) | 0.56 (0.51 , 0.60) |
| 58.60 | 147 | 59 | 42 | 48 | 0.75 (0.73 , 0.78) | 0.58 (0.54 , 0.63) | 0.78 (0.75 , 0.80) | 0.55 (0.50 , 0.60) |
| 58.50 | 147 | 58 | 43 | 48 | 0.75 (0.73 , 0.78) | 0.57 (0.53 , 0.62) | 0.77 (0.75 , 0.80) | 0.55 (0.50 , 0.59) |
| 58.20 | 147 | 57 | 44 | 48 | 0.75 (0.73 , 0.78) | 0.56 (0.52 , 0.61) | 0.77 (0.74 , 0.79) | 0.54 (0.50 , 0.59) |
| 57.40 | 148 | 57 | 44 | 47 | 0.76 (0.73 , 0.78) | 0.56 (0.52 , 0.61) | 0.77 (0.75 , 0.80) | 0.55 (0.50 , 0.60) |
| 57.00 | 150 | 57 | 44 | 45 | 0.77 (0.74 , 0.79) | 0.56 (0.52 , 0.61) | 0.77 (0.75 , 0.80) | 0.56 (0.51 , 0.61) |
| 56.00 | 151 | 57 | 44 | 44 | 0.77 (0.75 , 0.80) | 0.56 (0.52 , 0.61) | 0.77 (0.75 , 0.80) | 0.56 (0.52 , 0.61) |
| 55.70 | 151 | 56 | 45 | 44 | 0.77 (0.75 , 0.80) | 0.55 (0.51 , 0.60) | 0.77 (0.75 , 0.80) | 0.56 (0.51 , 0.61) |
| 54.40 | 152 | 56 | 45 | 43 | 0.78 (0.76 , 0.80) | 0.55 (0.51 , 0.60) | 0.77 (0.75 , 0.80) | 0.57 (0.52 , 0.61) |
| 54.20 | 152 | 55 | 46 | 43 | 0.78 (0.76 , 0.80) | 0.54 (0.50 , 0.59) | 0.77 (0.74 , 0.79) | 0.56 (0.51 , 0.61) |
| 53.90 | 153 | 55 | 46 | 42 | 0.78 (0.76 , 0.81) | 0.54 (0.50 , 0.59) | 0.77 (0.74 , 0.79) | 0.57 (0.52 , 0.62) |
| 53.70 | 153 | 54 | 47 | 42 | 0.78 (0.76 , 0.81) | 0.53 (0.49 , 0.58) | 0.77 (0.74 , 0.79) | 0.56 (0.51 , 0.61) |
| 53.60 | 153 | 53 | 48 | 42 | 0.78 (0.76 , 0.81) | 0.52 (0.48 , 0.57) | 0.76 (0.74 , 0.79) | 0.56 (0.51 , 0.61) |
| 53.50 | 154 | 53 | 48 | 41 | 0.79 (0.77 , 0.81) | 0.52 (0.48 , 0.57) | 0.76 (0.74 , 0.79) | 0.56 (0.51 , 0.61) |

|       |     |    |    |    |                    |                    |                    |                    |
|-------|-----|----|----|----|--------------------|--------------------|--------------------|--------------------|
| 52.30 | 154 | 52 | 49 | 41 | 0.79 (0.77 , 0.81) | 0.51 (0.47 , 0.56) | 0.76 (0.73 , 0.78) | 0.56 (0.51 , 0.61) |
| 51.50 | 154 | 51 | 50 | 41 | 0.79 (0.77 , 0.81) | 0.50 (0.46 , 0.55) | 0.75 (0.73 , 0.78) | 0.55 (0.50 , 0.60) |
| 51.30 | 154 | 50 | 51 | 41 | 0.79 (0.77 , 0.81) | 0.50 (0.45 , 0.54) | 0.75 (0.73 , 0.78) | 0.55 (0.50 , 0.60) |
| 51.20 | 156 | 50 | 51 | 39 | 0.80 (0.78 , 0.82) | 0.50 (0.45 , 0.54) | 0.75 (0.73 , 0.78) | 0.56 (0.51 , 0.61) |
| 50.50 | 156 | 49 | 52 | 39 | 0.80 (0.78 , 0.82) | 0.49 (0.44 , 0.53) | 0.75 (0.72 , 0.78) | 0.56 (0.51 , 0.61) |
| 50.40 | 156 | 48 | 53 | 39 | 0.80 (0.78 , 0.82) | 0.48 (0.43 , 0.52) | 0.75 (0.72 , 0.77) | 0.55 (0.50 , 0.60) |
| 50.30 | 157 | 48 | 53 | 38 | 0.81 (0.78 , 0.83) | 0.48 (0.43 , 0.52) | 0.75 (0.72 , 0.77) | 0.56 (0.51 , 0.61) |
| 49.90 | 157 | 47 | 54 | 38 | 0.81 (0.78 , 0.83) | 0.47 (0.42 , 0.51) | 0.74 (0.72 , 0.77) | 0.55 (0.50 , 0.61) |
| 49.40 | 158 | 47 | 54 | 37 | 0.81 (0.79 , 0.83) | 0.47 (0.42 , 0.51) | 0.75 (0.72 , 0.77) | 0.56 (0.51 , 0.61) |
| 49.20 | 159 | 47 | 54 | 36 | 0.82 (0.79 , 0.84) | 0.47 (0.42 , 0.51) | 0.75 (0.72 , 0.77) | 0.57 (0.51 , 0.62) |
| 48.90 | 159 | 46 | 55 | 36 | 0.82 (0.79 , 0.84) | 0.46 (0.41 , 0.50) | 0.74 (0.72 , 0.77) | 0.56 (0.51 , 0.61) |
| 48.80 | 159 | 45 | 56 | 36 | 0.82 (0.79 , 0.84) | 0.45 (0.40 , 0.49) | 0.74 (0.71 , 0.77) | 0.56 (0.50 , 0.61) |
| 48.60 | 159 | 44 | 57 | 36 | 0.82 (0.79 , 0.84) | 0.44 (0.39 , 0.48) | 0.74 (0.71 , 0.76) | 0.55 (0.50 , 0.60) |
| 48.40 | 160 | 44 | 57 | 35 | 0.82 (0.80 , 0.84) | 0.44 (0.39 , 0.48) | 0.74 (0.71 , 0.76) | 0.56 (0.50 , 0.61) |
| 48.30 | 160 | 43 | 58 | 35 | 0.82 (0.80 , 0.84) | 0.43 (0.38 , 0.47) | 0.73 (0.71 , 0.76) | 0.55 (0.50 , 0.61) |
| 48.10 | 163 | 42 | 59 | 32 | 0.84 (0.82 , 0.86) | 0.42 (0.37 , 0.46) | 0.73 (0.71 , 0.76) | 0.57 (0.51 , 0.62) |
| 47.60 | 163 | 41 | 60 | 32 | 0.84 (0.82 , 0.86) | 0.41 (0.36 , 0.45) | 0.73 (0.71 , 0.76) | 0.56 (0.51 , 0.62) |
| 46.90 | 164 | 41 | 60 | 31 | 0.84 (0.82 , 0.86) | 0.41 (0.36 , 0.45) | 0.73 (0.71 , 0.76) | 0.57 (0.51 , 0.63) |
| 46.50 | 164 | 40 | 61 | 31 | 0.84 (0.82 , 0.86) | 0.40 (0.35 , 0.44) | 0.73 (0.70 , 0.75) | 0.56 (0.51 , 0.62) |
| 46.20 | 164 | 39 | 62 | 31 | 0.84 (0.82 , 0.86) | 0.39 (0.34 , 0.43) | 0.73 (0.70 , 0.75) | 0.56 (0.50 , 0.61) |
| 46.10 | 165 | 39 | 62 | 30 | 0.85 (0.83 , 0.86) | 0.39 (0.34 , 0.43) | 0.73 (0.70 , 0.75) | 0.57 (0.51 , 0.62) |
| 45.70 | 167 | 39 | 62 | 28 | 0.86 (0.84 , 0.87) | 0.39 (0.34 , 0.43) | 0.73 (0.70 , 0.75) | 0.58 (0.52 , 0.64) |

|       |     |    |    |    |                    |                    |                    |                    |
|-------|-----|----|----|----|--------------------|--------------------|--------------------|--------------------|
| 44.90 | 168 | 39 | 62 | 27 | 0.86 (0.84 , 0.88) | 0.39 (0.34 , 0.43) | 0.73 (0.70 , 0.76) | 0.59 (0.53 , 0.65) |
| 43.10 | 168 | 38 | 63 | 27 | 0.86 (0.84 , 0.88) | 0.38 (0.33 , 0.42) | 0.73 (0.70 , 0.75) | 0.58 (0.53 , 0.64) |
| 42.60 | 169 | 38 | 63 | 26 | 0.87 (0.85 , 0.88) | 0.38 (0.33 , 0.42) | 0.73 (0.70 , 0.75) | 0.59 (0.53 , 0.65) |
| 42.50 | 169 | 37 | 64 | 26 | 0.87 (0.85 , 0.88) | 0.37 (0.32 , 0.41) | 0.73 (0.70 , 0.75) | 0.59 (0.53 , 0.65) |
| 42.30 | 170 | 37 | 64 | 25 | 0.87 (0.86 , 0.89) | 0.37 (0.32 , 0.41) | 0.73 (0.70 , 0.75) | 0.60 (0.54 , 0.66) |
| 42.20 | 171 | 36 | 65 | 24 | 0.88 (0.86 , 0.89) | 0.36 (0.31 , 0.40) | 0.72 (0.70 , 0.75) | 0.60 (0.54 , 0.66) |
| 41.50 | 172 | 34 | 67 | 23 | 0.88 (0.87 , 0.90) | 0.34 (0.29 , 0.38) | 0.72 (0.69 , 0.75) | 0.60 (0.53 , 0.66) |
| 40.80 | 173 | 33 | 68 | 22 | 0.89 (0.87 , 0.90) | 0.33 (0.28 , 0.37) | 0.72 (0.69 , 0.74) | 0.60 (0.54 , 0.66) |
| 40.50 | 174 | 33 | 68 | 21 | 0.89 (0.88 , 0.91) | 0.33 (0.28 , 0.37) | 0.72 (0.69 , 0.74) | 0.61 (0.55 , 0.67) |
| 39.60 | 174 | 30 | 71 | 21 | 0.89 (0.88 , 0.91) | 0.30 (0.26 , 0.34) | 0.71 (0.68 , 0.74) | 0.59 (0.52 , 0.65) |
| 39.20 | 174 | 28 | 73 | 21 | 0.89 (0.88 , 0.91) | 0.28 (0.24 , 0.32) | 0.70 (0.68 , 0.73) | 0.57 (0.50 , 0.64) |
| 38.00 | 175 | 27 | 74 | 20 | 0.90 (0.88 , 0.91) | 0.27 (0.23 , 0.31) | 0.70 (0.68 , 0.73) | 0.57 (0.50 , 0.64) |
| 37.00 | 176 | 27 | 74 | 19 | 0.90 (0.89 , 0.91) | 0.27 (0.23 , 0.31) | 0.70 (0.68 , 0.73) | 0.59 (0.52 , 0.66) |
| 36.90 | 177 | 27 | 74 | 18 | 0.91 (0.90 , 0.92) | 0.27 (0.23 , 0.31) | 0.71 (0.68 , 0.73) | 0.60 (0.53 , 0.67) |
| 36.20 | 177 | 26 | 75 | 18 | 0.91 (0.90 , 0.92) | 0.26 (0.22 , 0.29) | 0.70 (0.68 , 0.73) | 0.59 (0.52 , 0.66) |
| 36.10 | 178 | 26 | 75 | 17 | 0.91 (0.90 , 0.92) | 0.26 (0.22 , 0.29) | 0.70 (0.68 , 0.73) | 0.60 (0.53 , 0.68) |
| 35.90 | 179 | 25 | 76 | 16 | 0.92 (0.91 , 0.93) | 0.25 (0.21 , 0.28) | 0.70 (0.68 , 0.73) | 0.61 (0.54 , 0.68) |
| 35.80 | 180 | 25 | 76 | 15 | 0.92 (0.91 , 0.93) | 0.25 (0.21 , 0.28) | 0.70 (0.68 , 0.73) | 0.63 (0.55 , 0.70) |
| 35.20 | 180 | 24 | 77 | 15 | 0.92 (0.91 , 0.93) | 0.24 (0.20 , 0.27) | 0.70 (0.67 , 0.73) | 0.62 (0.54 , 0.69) |
| 34.00 | 180 | 23 | 78 | 15 | 0.92 (0.91 , 0.93) | 0.23 (0.19 , 0.26) | 0.70 (0.67 , 0.72) | 0.61 (0.53 , 0.68) |
| 33.90 | 181 | 23 | 78 | 14 | 0.93 (0.92 , 0.94) | 0.23 (0.19 , 0.26) | 0.70 (0.67 , 0.72) | 0.62 (0.55 , 0.70) |
| 33.80 | 181 | 22 | 79 | 14 | 0.93 (0.92 , 0.94) | 0.22 (0.18 , 0.25) | 0.70 (0.67 , 0.72) | 0.61 (0.53 , 0.69) |

|       |     |    |    |    |                    |                    |                    |                    |
|-------|-----|----|----|----|--------------------|--------------------|--------------------|--------------------|
| 32.90 | 181 | 21 | 80 | 14 | 0.93 (0.92 , 0.94) | 0.21 (0.18 , 0.24) | 0.69 (0.67 , 0.72) | 0.60 (0.52 , 0.68) |
| 32.70 | 182 | 21 | 80 | 13 | 0.93 (0.92 , 0.94) | 0.21 (0.18 , 0.24) | 0.69 (0.67 , 0.72) | 0.62 (0.54 , 0.70) |
| 32.40 | 183 | 21 | 80 | 12 | 0.94 (0.93 , 0.95) | 0.21 (0.18 , 0.24) | 0.70 (0.67 , 0.72) | 0.64 (0.56 , 0.72) |
| 31.90 | 184 | 21 | 80 | 11 | 0.94 (0.94 , 0.95) | 0.21 (0.18 , 0.24) | 0.70 (0.67 , 0.72) | 0.66 (0.58 , 0.73) |
| 31.40 | 185 | 21 | 80 | 10 | 0.95 (0.94 , 0.96) | 0.21 (0.18 , 0.24) | 0.70 (0.67 , 0.72) | 0.68 (0.60 , 0.75) |
| 30.30 | 185 | 20 | 81 | 10 | 0.95 (0.94 , 0.96) | 0.20 (0.17 , 0.23) | 0.70 (0.67 , 0.72) | 0.67 (0.59 , 0.75) |
| 28.70 | 185 | 19 | 82 | 10 | 0.95 (0.94 , 0.96) | 0.19 (0.16 , 0.22) | 0.69 (0.67 , 0.72) | 0.66 (0.57 , 0.74) |
| 28.00 | 185 | 18 | 83 | 10 | 0.95 (0.94 , 0.96) | 0.18 (0.15 , 0.21) | 0.69 (0.66 , 0.72) | 0.64 (0.56 , 0.73) |
| 27.80 | 185 | 17 | 84 | 10 | 0.95 (0.94 , 0.96) | 0.17 (0.14 , 0.20) | 0.69 (0.66 , 0.71) | 0.63 (0.54 , 0.72) |
| 27.20 | 185 | 16 | 85 | 10 | 0.95 (0.94 , 0.96) | 0.16 (0.13 , 0.18) | 0.69 (0.66 , 0.71) | 0.62 (0.52 , 0.71) |
| 26.10 | 185 | 15 | 86 | 10 | 0.95 (0.94 , 0.96) | 0.15 (0.12 , 0.17) | 0.68 (0.66 , 0.71) | 0.60 (0.51 , 0.69) |
| 25.20 | 185 | 14 | 87 | 10 | 0.95 (0.94 , 0.96) | 0.14 (0.12 , 0.16) | 0.68 (0.65 , 0.71) | 0.58 (0.49 , 0.68) |
| 24.90 | 185 | 13 | 88 | 10 | 0.95 (0.94 , 0.96) | 0.13 (0.11 , 0.15) | 0.68 (0.65 , 0.70) | 0.57 (0.46 , 0.67) |
| 23.80 | 186 | 13 | 88 | 9  | 0.95 (0.95 , 0.96) | 0.13 (0.11 , 0.15) | 0.68 (0.65 , 0.70) | 0.59 (0.49 , 0.69) |
| 23.60 | 186 | 12 | 89 | 9  | 0.95 (0.95 , 0.96) | 0.12 (0.10 , 0.14) | 0.68 (0.65 , 0.70) | 0.57 (0.47 , 0.68) |
| 22.80 | 187 | 12 | 89 | 8  | 0.96 (0.95 , 0.96) | 0.12 (0.10 , 0.14) | 0.68 (0.65 , 0.70) | 0.60 (0.49 , 0.71) |
| 22.60 | 187 | 11 | 90 | 8  | 0.96 (0.95 , 0.96) | 0.11 (0.09 , 0.13) | 0.68 (0.65 , 0.70) | 0.58 (0.47 , 0.69) |
| 19.60 | 188 | 11 | 90 | 7  | 0.96 (0.96 , 0.97) | 0.11 (0.09 , 0.13) | 0.68 (0.65 , 0.70) | 0.61 (0.50 , 0.72) |
| 19.40 | 189 | 11 | 90 | 6  | 0.97 (0.97 , 0.97) | 0.11 (0.09 , 0.13) | 0.68 (0.65 , 0.70) | 0.65 (0.54 , 0.76) |
| 18.80 | 189 | 10 | 91 | 6  | 0.97 (0.97 , 0.97) | 0.10 (0.08 , 0.12) | 0.68 (0.65 , 0.70) | 0.63 (0.51 , 0.74) |
| 18.08 | 190 | 10 | 91 | 5  | 0.97 (0.97 , 0.98) | 0.10 (0.08 , 0.12) | 0.68 (0.65 , 0.70) | 0.67 (0.55 , 0.78) |
| 17.40 | 190 | 8  | 93 | 5  | 0.97 (0.97 , 0.98) | 0.08 (0.06 , 0.09) | 0.67 (0.65 , 0.70) | 0.62 (0.49 , 0.74) |

|       |     |   |     |   |                    |                    |                    |                    |
|-------|-----|---|-----|---|--------------------|--------------------|--------------------|--------------------|
| 16.60 | 190 | 7 | 94  | 5 | 0.97 (0.97 , 0.98) | 0.07 (0.06 , 0.08) | 0.67 (0.64 , 0.69) | 0.58 (0.45 , 0.72) |
| 15.10 | 191 | 7 | 94  | 4 | 0.98 (0.98 , 0.98) | 0.07 (0.06 , 0.08) | 0.67 (0.64 , 0.70) | 0.64 (0.50 , 0.77) |
| 13.40 | 192 | 7 | 94  | 3 | 0.98 (0.98 , 0.99) | 0.07 (0.06 , 0.08) | 0.67 (0.65 , 0.70) | 0.70 (0.57 , 0.83) |
| 11.40 | 193 | 7 | 94  | 2 | 0.99 (0.99 , 0.99) | 0.07 (0.06 , 0.08) | 0.67 (0.65 , 0.70) | 0.78 (0.66 , 0.89) |
| 11.30 | 193 | 6 | 95  | 2 | 0.99 (0.99 , 0.99) | 0.06 (0.05 , 0.07) | 0.67 (0.64 , 0.70) | 0.75 (0.62 , 0.88) |
| 9.60  | 193 | 5 | 96  | 2 | 0.99 (0.99 , 0.99) | 0.05 (0.04 , 0.06) | 0.67 (0.64 , 0.69) | 0.71 (0.56 , 0.87) |
| 8.40  | 193 | 4 | 97  | 2 | 0.99 (0.99 , 0.99) | 0.04 (0.03 , 0.05) | 0.67 (0.64 , 0.69) | 0.67 (0.49 , 0.84) |
| 6.90  | 194 | 4 | 97  | 1 | 0.99 (0.99 , 1.00) | 0.04 (0.03 , 0.05) | 0.67 (0.64 , 0.69) | 0.80 (0.66 , 0.94) |
| 1.00  | 195 | 2 | 99  | 0 | 1.00 (1.00 , 1.00) | 0.02 (0.02 , 0.02) | 0.66 (0.64 , 0.69) | 1.00 (1.00 , 1.00) |
| 0.95  | 195 | 1 | 100 | 0 | 1.00 (1.00 , 1.00) | 0.01 (0.01 , 0.01) | 0.66 (0.64 , 0.69) | 1.00 (1.00 , 1.00) |
| 0.80  | 195 | 0 | 101 | 0 | 1.00 (1.00 , 1.00) | 0.00 (0.00 , 0.00) | 0.66 (0.63 , 0.68) | ( , )              |

8  
9

10 Supplemental Table 3. Sensitivity, specificity, positive predictive value, and negative predictive value, along with 95%  
 11 confidence intervals, for all observed model counts in combined MC and LUMC data set. MCM, Time 1.

| MC<br>M<br>score | No. of<br>Correctly<br>Predicted<br>Events | No. of<br>Correctly<br>Predicted<br>Nonevents | No. of<br>Nonevents<br>Predicted<br>as<br>Events | No. of<br>Events<br>Predicted<br>as<br>Nonevents | Sensitivity<br>(95% CI) | Specificity<br>(95% CI) | Positive<br>predictive<br>value (95%<br>CI) | Negative<br>predictive<br>value (95%<br>CI) |
|------------------|--------------------------------------------|-----------------------------------------------|--------------------------------------------------|--------------------------------------------------|-------------------------|-------------------------|---------------------------------------------|---------------------------------------------|
| 100.00           | 1                                          | 101                                           | 0                                                | 194                                              | 0.01 (0.00 , 0.01)      | 1.00 (1.00 , 1.00)      | 1.00 (1.00 , 1.00)                          | 0.34 (0.32 , 0.37)                          |
| 99.50            | 3                                          | 101                                           | 0                                                | 192                                              | 0.02 (0.01 , 0.02)      | 1.00 (1.00 , 1.00)      | 1.00 (1.00 , 1.00)                          | 0.34 (0.32 , 0.37)                          |
| 99.30            | 4                                          | 101                                           | 0                                                | 191                                              | 0.02 (0.02 , 0.02)      | 1.00 (1.00 , 1.00)      | 1.00 (1.00 , 1.00)                          | 0.35 (0.32 , 0.37)                          |
| 99.00            | 5                                          | 101                                           | 0                                                | 190                                              | 0.03 (0.02 , 0.03)      | 1.00 (1.00 , 1.00)      | 1.00 (1.00 , 1.00)                          | 0.35 (0.32 , 0.37)                          |
| 98.50            | 6                                          | 101                                           | 0                                                | 189                                              | 0.03 (0.03 , 0.03)      | 1.00 (1.00 , 1.00)      | 1.00 (1.00 , 1.00)                          | 0.35 (0.32 , 0.37)                          |
| 97.00            | 7                                          | 101                                           | 0                                                | 188                                              | 0.04 (0.03 , 0.04)      | 1.00 (1.00 , 1.00)      | 1.00 (1.00 , 1.00)                          | 0.35 (0.32 , 0.38)                          |
| 95.30            | 8                                          | 101                                           | 0                                                | 187                                              | 0.04 (0.04 , 0.05)      | 1.00 (1.00 , 1.00)      | 1.00 (1.00 , 1.00)                          | 0.35 (0.32 , 0.38)                          |
| 93.70            | 8                                          | 100                                           | 1                                                | 187                                              | 0.04 (0.04 , 0.05)      | 0.99 (0.99 , 0.99)      | 0.89 (0.82 , 0.95)                          | 0.35 (0.32 , 0.37)                          |
| 93.40            | 9                                          | 100                                           | 1                                                | 186                                              | 0.05 (0.04 , 0.05)      | 0.99 (0.99 , 0.99)      | 0.90 (0.84 , 0.96)                          | 0.35 (0.32 , 0.38)                          |
| 92.90            | 10                                         | 100                                           | 1                                                | 185                                              | 0.05 (0.04 , 0.06)      | 0.99 (0.99 , 0.99)      | 0.91 (0.86 , 0.96)                          | 0.35 (0.32 , 0.38)                          |
| 92.60            | 12                                         | 100                                           | 1                                                | 183                                              | 0.06 (0.05 , 0.07)      | 0.99 (0.99 , 0.99)      | 0.92 (0.88 , 0.96)                          | 0.35 (0.33 , 0.38)                          |
| 92.50            | 13                                         | 100                                           | 1                                                | 182                                              | 0.07 (0.06 , 0.08)      | 0.99 (0.99 , 0.99)      | 0.93 (0.89 , 0.96)                          | 0.35 (0.33 , 0.38)                          |
| 92.40            | 14                                         | 100                                           | 1                                                | 181                                              | 0.07 (0.06 , 0.08)      | 0.99 (0.99 , 0.99)      | 0.93 (0.90 , 0.96)                          | 0.36 (0.33 , 0.38)                          |
| 92.00            | 15                                         | 100                                           | 1                                                | 180                                              | 0.08 (0.07 , 0.09)      | 0.99 (0.99 , 0.99)      | 0.94 (0.91 , 0.97)                          | 0.36 (0.33 , 0.38)                          |
| 91.90            | 16                                         | 100                                           | 1                                                | 179                                              | 0.08 (0.07 , 0.09)      | 0.99 (0.99 , 0.99)      | 0.94 (0.91 , 0.97)                          | 0.36 (0.33 , 0.39)                          |
| 91.60            | 17                                         | 100                                           | 1                                                | 178                                              | 0.09 (0.08 , 0.10)      | 0.99 (0.99 , 0.99)      | 0.94 (0.92 , 0.97)                          | 0.36 (0.33 , 0.39)                          |
| 91.50            | 18                                         | 100                                           | 1                                                | 177                                              | 0.09 (0.08 , 0.10)      | 0.99 (0.99 , 0.99)      | 0.95 (0.92 , 0.97)                          | 0.36 (0.33 , 0.39)                          |

|       |    |     |   |     |                    |                    |                    |                    |
|-------|----|-----|---|-----|--------------------|--------------------|--------------------|--------------------|
| 91.30 | 19 | 100 | 1 | 176 | 0.10 (0.09 , 0.11) | 0.99 (0.99 , 0.99) | 0.95 (0.93 , 0.97) | 0.36 (0.34 , 0.39) |
| 90.40 | 20 | 100 | 1 | 175 | 0.10 (0.09 , 0.12) | 0.99 (0.99 , 0.99) | 0.95 (0.93 , 0.97) | 0.36 (0.34 , 0.39) |
| 90.10 | 21 | 100 | 1 | 174 | 0.11 (0.09 , 0.12) | 0.99 (0.99 , 0.99) | 0.95 (0.94 , 0.97) | 0.36 (0.34 , 0.39) |
| 89.00 | 22 | 100 | 1 | 173 | 0.11 (0.10 , 0.13) | 0.99 (0.99 , 0.99) | 0.96 (0.94 , 0.97) | 0.37 (0.34 , 0.39) |
| 85.40 | 23 | 100 | 1 | 172 | 0.12 (0.10 , 0.13) | 0.99 (0.99 , 0.99) | 0.96 (0.94 , 0.97) | 0.37 (0.34 , 0.40) |
| 84.80 | 24 | 100 | 1 | 171 | 0.12 (0.11 , 0.14) | 0.99 (0.99 , 0.99) | 0.96 (0.94 , 0.98) | 0.37 (0.34 , 0.40) |
| 84.10 | 25 | 100 | 1 | 170 | 0.13 (0.11 , 0.14) | 0.99 (0.99 , 0.99) | 0.96 (0.95 , 0.98) | 0.37 (0.34 , 0.40) |
| 83.70 | 25 | 98  | 3 | 170 | 0.13 (0.11 , 0.14) | 0.97 (0.96 , 0.98) | 0.89 (0.86 , 0.93) | 0.37 (0.34 , 0.39) |
| 83.10 | 26 | 98  | 3 | 169 | 0.13 (0.12 , 0.15) | 0.97 (0.96 , 0.98) | 0.90 (0.86 , 0.93) | 0.37 (0.34 , 0.39) |
| 82.30 | 27 | 98  | 3 | 168 | 0.14 (0.12 , 0.16) | 0.97 (0.96 , 0.98) | 0.90 (0.87 , 0.93) | 0.37 (0.34 , 0.40) |
| 81.70 | 28 | 98  | 3 | 167 | 0.14 (0.13 , 0.16) | 0.97 (0.96 , 0.98) | 0.90 (0.87 , 0.93) | 0.37 (0.34 , 0.40) |
| 81.60 | 29 | 98  | 3 | 166 | 0.15 (0.13 , 0.17) | 0.97 (0.96 , 0.98) | 0.91 (0.88 , 0.94) | 0.37 (0.34 , 0.40) |
| 81.00 | 30 | 98  | 3 | 165 | 0.15 (0.14 , 0.17) | 0.97 (0.96 , 0.98) | 0.91 (0.88 , 0.94) | 0.37 (0.34 , 0.40) |
| 80.30 | 31 | 98  | 3 | 164 | 0.16 (0.14 , 0.18) | 0.97 (0.96 , 0.98) | 0.91 (0.88 , 0.94) | 0.37 (0.35 , 0.40) |
| 77.00 | 32 | 98  | 3 | 163 | 0.16 (0.14 , 0.18) | 0.97 (0.96 , 0.98) | 0.91 (0.89 , 0.94) | 0.38 (0.35 , 0.40) |
| 76.40 | 33 | 98  | 3 | 162 | 0.17 (0.15 , 0.19) | 0.97 (0.96 , 0.98) | 0.92 (0.89 , 0.94) | 0.38 (0.35 , 0.41) |
| 76.10 | 34 | 98  | 3 | 161 | 0.17 (0.15 , 0.19) | 0.97 (0.96 , 0.98) | 0.92 (0.89 , 0.94) | 0.38 (0.35 , 0.41) |
| 76.00 | 35 | 98  | 3 | 160 | 0.18 (0.16 , 0.20) | 0.97 (0.96 , 0.98) | 0.92 (0.90 , 0.94) | 0.38 (0.35 , 0.41) |
| 75.80 | 36 | 98  | 3 | 159 | 0.18 (0.16 , 0.21) | 0.97 (0.96 , 0.98) | 0.92 (0.90 , 0.95) | 0.38 (0.35 , 0.41) |
| 75.40 | 36 | 97  | 4 | 159 | 0.18 (0.16 , 0.21) | 0.96 (0.95 , 0.97) | 0.90 (0.87 , 0.93) | 0.38 (0.35 , 0.41) |
| 74.00 | 36 | 96  | 5 | 159 | 0.18 (0.16 , 0.21) | 0.95 (0.94 , 0.96) | 0.88 (0.85 , 0.91) | 0.38 (0.35 , 0.41) |
| 73.70 | 37 | 96  | 5 | 158 | 0.19 (0.17 , 0.21) | 0.95 (0.94 , 0.96) | 0.88 (0.85 , 0.91) | 0.38 (0.35 , 0.41) |



|       |    |    |    |     |                    |                    |                    |                    |
|-------|----|----|----|-----|--------------------|--------------------|--------------------|--------------------|
| 73.00 | 38 | 96 | 5  | 157 | 0.19 (0.17 , 0.22) | 0.95 (0.94 , 0.96) | 0.88 (0.85 , 0.91) | 0.38 (0.35 , 0.41) |
| 72.10 | 39 | 96 | 5  | 156 | 0.20 (0.18 , 0.22) | 0.95 (0.94 , 0.96) | 0.89 (0.86 , 0.92) | 0.38 (0.35 , 0.41) |
| 70.50 | 40 | 96 | 5  | 155 | 0.21 (0.18 , 0.23) | 0.95 (0.94 , 0.96) | 0.89 (0.86 , 0.92) | 0.38 (0.35 , 0.41) |
| 70.20 | 40 | 94 | 7  | 155 | 0.21 (0.18 , 0.23) | 0.93 (0.92 , 0.94) | 0.85 (0.81 , 0.89) | 0.38 (0.35 , 0.41) |
| 70.00 | 41 | 94 | 7  | 154 | 0.21 (0.19 , 0.23) | 0.93 (0.92 , 0.94) | 0.85 (0.82 , 0.89) | 0.38 (0.35 , 0.41) |
| 68.90 | 43 | 94 | 7  | 152 | 0.22 (0.20 , 0.24) | 0.93 (0.92 , 0.94) | 0.86 (0.83 , 0.89) | 0.38 (0.35 , 0.41) |
| 68.50 | 45 | 94 | 7  | 150 | 0.23 (0.21 , 0.26) | 0.93 (0.92 , 0.94) | 0.87 (0.83 , 0.90) | 0.39 (0.36 , 0.41) |
| 68.40 | 46 | 94 | 7  | 149 | 0.24 (0.21 , 0.26) | 0.93 (0.92 , 0.94) | 0.87 (0.84 , 0.90) | 0.39 (0.36 , 0.42) |
| 68.00 | 47 | 94 | 7  | 148 | 0.24 (0.22 , 0.27) | 0.93 (0.92 , 0.94) | 0.87 (0.84 , 0.90) | 0.39 (0.36 , 0.42) |
| 67.90 | 49 | 94 | 7  | 146 | 0.25 (0.22 , 0.28) | 0.93 (0.92 , 0.94) | 0.88 (0.85 , 0.90) | 0.39 (0.36 , 0.42) |
| 67.50 | 50 | 94 | 7  | 145 | 0.26 (0.23 , 0.28) | 0.93 (0.92 , 0.94) | 0.88 (0.85 , 0.91) | 0.39 (0.36 , 0.42) |
| 66.90 | 51 | 94 | 7  | 144 | 0.26 (0.23 , 0.29) | 0.93 (0.92 , 0.94) | 0.88 (0.85 , 0.91) | 0.39 (0.36 , 0.43) |
| 65.50 | 51 | 93 | 8  | 144 | 0.26 (0.23 , 0.29) | 0.92 (0.91 , 0.94) | 0.86 (0.83 , 0.89) | 0.39 (0.36 , 0.42) |
| 64.60 | 52 | 93 | 8  | 143 | 0.27 (0.24 , 0.29) | 0.92 (0.91 , 0.94) | 0.87 (0.84 , 0.90) | 0.39 (0.36 , 0.42) |
| 64.20 | 52 | 92 | 9  | 143 | 0.27 (0.24 , 0.29) | 0.91 (0.90 , 0.93) | 0.85 (0.82 , 0.88) | 0.39 (0.36 , 0.42) |
| 63.70 | 52 | 91 | 10 | 143 | 0.27 (0.24 , 0.29) | 0.90 (0.88 , 0.92) | 0.84 (0.81 , 0.87) | 0.39 (0.36 , 0.42) |
| 63.00 | 53 | 91 | 10 | 142 | 0.27 (0.24 , 0.30) | 0.90 (0.88 , 0.92) | 0.84 (0.81 , 0.87) | 0.39 (0.36 , 0.42) |
| 61.90 | 53 | 89 | 12 | 142 | 0.27 (0.24 , 0.30) | 0.88 (0.86 , 0.90) | 0.82 (0.78 , 0.85) | 0.39 (0.35 , 0.42) |
| 61.20 | 54 | 89 | 12 | 141 | 0.28 (0.25 , 0.31) | 0.88 (0.86 , 0.90) | 0.82 (0.78 , 0.85) | 0.39 (0.36 , 0.42) |
| 60.90 | 55 | 89 | 12 | 140 | 0.28 (0.25 , 0.31) | 0.88 (0.86 , 0.90) | 0.82 (0.79 , 0.86) | 0.39 (0.36 , 0.42) |
| 60.50 | 56 | 89 | 12 | 139 | 0.29 (0.26 , 0.32) | 0.88 (0.86 , 0.90) | 0.82 (0.79 , 0.86) | 0.39 (0.36 , 0.42) |
| 59.60 | 57 | 89 | 12 | 138 | 0.29 (0.26 , 0.32) | 0.88 (0.86 , 0.90) | 0.83 (0.79 , 0.86) | 0.39 (0.36 , 0.42) |

|       |    |    |    |     |                    |                    |                    |                    |
|-------|----|----|----|-----|--------------------|--------------------|--------------------|--------------------|
| 59.50 | 58 | 89 | 12 | 137 | 0.30 (0.27 , 0.33) | 0.88 (0.86 , 0.90) | 0.83 (0.80 , 0.86) | 0.39 (0.36 , 0.42) |
| 59.30 | 59 | 89 | 12 | 136 | 0.30 (0.27 , 0.33) | 0.88 (0.86 , 0.90) | 0.83 (0.80 , 0.86) | 0.40 (0.36 , 0.43) |
| 57.70 | 59 | 88 | 13 | 136 | 0.30 (0.27 , 0.33) | 0.87 (0.85 , 0.89) | 0.82 (0.79 , 0.85) | 0.39 (0.36 , 0.42) |
| 57.40 | 60 | 88 | 13 | 135 | 0.31 (0.28 , 0.34) | 0.87 (0.85 , 0.89) | 0.82 (0.79 , 0.86) | 0.39 (0.36 , 0.43) |
| 56.90 | 61 | 88 | 13 | 134 | 0.31 (0.28 , 0.34) | 0.87 (0.85 , 0.89) | 0.82 (0.79 , 0.86) | 0.40 (0.36 , 0.43) |
| 56.00 | 62 | 87 | 14 | 133 | 0.32 (0.29 , 0.35) | 0.86 (0.84 , 0.88) | 0.82 (0.78 , 0.85) | 0.40 (0.36 , 0.43) |
| 55.80 | 63 | 87 | 14 | 132 | 0.32 (0.29 , 0.35) | 0.86 (0.84 , 0.88) | 0.82 (0.78 , 0.85) | 0.40 (0.37 , 0.43) |
| 55.50 | 64 | 87 | 14 | 131 | 0.33 (0.30 , 0.36) | 0.86 (0.84 , 0.88) | 0.82 (0.79 , 0.85) | 0.40 (0.37 , 0.43) |
| 55.00 | 65 | 87 | 14 | 130 | 0.33 (0.30 , 0.36) | 0.86 (0.84 , 0.88) | 0.82 (0.79 , 0.85) | 0.40 (0.37 , 0.43) |
| 54.80 | 66 | 87 | 14 | 129 | 0.34 (0.31 , 0.37) | 0.86 (0.84 , 0.88) | 0.83 (0.79 , 0.86) | 0.40 (0.37 , 0.43) |
| 54.30 | 66 | 86 | 15 | 129 | 0.34 (0.31 , 0.37) | 0.85 (0.83 , 0.88) | 0.81 (0.78 , 0.85) | 0.40 (0.37 , 0.43) |
| 54.00 | 67 | 86 | 15 | 128 | 0.34 (0.31 , 0.38) | 0.85 (0.83 , 0.88) | 0.82 (0.78 , 0.85) | 0.40 (0.37 , 0.43) |
| 53.80 | 68 | 85 | 16 | 127 | 0.35 (0.32 , 0.38) | 0.84 (0.82 , 0.87) | 0.81 (0.78 , 0.84) | 0.40 (0.37 , 0.43) |
| 53.50 | 69 | 85 | 16 | 126 | 0.35 (0.32 , 0.39) | 0.84 (0.82 , 0.87) | 0.81 (0.78 , 0.84) | 0.40 (0.37 , 0.44) |
| 52.60 | 70 | 85 | 16 | 125 | 0.36 (0.33 , 0.39) | 0.84 (0.82 , 0.87) | 0.81 (0.78 , 0.85) | 0.40 (0.37 , 0.44) |
| 52.50 | 70 | 84 | 17 | 125 | 0.36 (0.33 , 0.39) | 0.83 (0.80 , 0.86) | 0.80 (0.77 , 0.84) | 0.40 (0.37 , 0.43) |
| 52.30 | 71 | 84 | 17 | 124 | 0.36 (0.33 , 0.40) | 0.83 (0.80 , 0.86) | 0.81 (0.77 , 0.84) | 0.40 (0.37 , 0.44) |
| 51.70 | 72 | 84 | 17 | 123 | 0.37 (0.34 , 0.40) | 0.83 (0.80 , 0.86) | 0.81 (0.78 , 0.84) | 0.41 (0.37 , 0.44) |
| 51.10 | 74 | 84 | 17 | 121 | 0.38 (0.35 , 0.41) | 0.83 (0.80 , 0.86) | 0.81 (0.78 , 0.84) | 0.41 (0.38 , 0.44) |
| 50.80 | 74 | 83 | 18 | 121 | 0.38 (0.35 , 0.41) | 0.82 (0.79 , 0.85) | 0.80 (0.77 , 0.84) | 0.41 (0.37 , 0.44) |
| 50.60 | 75 | 83 | 18 | 120 | 0.38 (0.35 , 0.42) | 0.82 (0.79 , 0.85) | 0.81 (0.77 , 0.84) | 0.41 (0.38 , 0.44) |
| 50.30 | 76 | 83 | 18 | 119 | 0.39 (0.36 , 0.42) | 0.82 (0.79 , 0.85) | 0.81 (0.78 , 0.84) | 0.41 (0.38 , 0.44) |

|       |    |    |    |     |                    |                    |                    |                    |
|-------|----|----|----|-----|--------------------|--------------------|--------------------|--------------------|
| 50.10 | 78 | 83 | 18 | 117 | 0.40 (0.37 , 0.43) | 0.82 (0.79 , 0.85) | 0.81 (0.78 , 0.84) | 0.42 (0.38 , 0.45) |
| 49.40 | 78 | 82 | 19 | 117 | 0.40 (0.37 , 0.43) | 0.81 (0.78 , 0.84) | 0.80 (0.77 , 0.84) | 0.41 (0.38 , 0.45) |
| 49.10 | 78 | 81 | 20 | 117 | 0.40 (0.37 , 0.43) | 0.80 (0.77 , 0.83) | 0.80 (0.76 , 0.83) | 0.41 (0.38 , 0.44) |
| 47.90 | 79 | 81 | 20 | 116 | 0.41 (0.37 , 0.44) | 0.80 (0.77 , 0.83) | 0.80 (0.77 , 0.83) | 0.41 (0.38 , 0.44) |
| 47.60 | 79 | 80 | 21 | 116 | 0.41 (0.37 , 0.44) | 0.79 (0.76 , 0.82) | 0.79 (0.76 , 0.82) | 0.41 (0.37 , 0.44) |
| 46.90 | 80 | 80 | 21 | 115 | 0.41 (0.38 , 0.44) | 0.79 (0.76 , 0.82) | 0.79 (0.76 , 0.82) | 0.41 (0.38 , 0.44) |
| 46.70 | 81 | 80 | 21 | 114 | 0.42 (0.38 , 0.45) | 0.79 (0.76 , 0.82) | 0.79 (0.76 , 0.83) | 0.41 (0.38 , 0.45) |
| 46.20 | 82 | 80 | 21 | 113 | 0.42 (0.39 , 0.45) | 0.79 (0.76 , 0.82) | 0.80 (0.76 , 0.83) | 0.41 (0.38 , 0.45) |
| 45.90 | 84 | 80 | 21 | 111 | 0.43 (0.40 , 0.47) | 0.79 (0.76 , 0.82) | 0.80 (0.77 , 0.83) | 0.42 (0.38 , 0.45) |
| 45.20 | 85 | 80 | 21 | 110 | 0.44 (0.40 , 0.47) | 0.79 (0.76 , 0.82) | 0.80 (0.77 , 0.83) | 0.42 (0.39 , 0.46) |
| 44.90 | 86 | 79 | 22 | 109 | 0.44 (0.41 , 0.48) | 0.78 (0.75 , 0.82) | 0.80 (0.77 , 0.83) | 0.42 (0.39 , 0.46) |
| 44.60 | 87 | 79 | 22 | 108 | 0.45 (0.41 , 0.48) | 0.78 (0.75 , 0.82) | 0.80 (0.77 , 0.83) | 0.42 (0.39 , 0.46) |
| 44.10 | 88 | 79 | 22 | 107 | 0.45 (0.42 , 0.49) | 0.78 (0.75 , 0.82) | 0.80 (0.77 , 0.83) | 0.42 (0.39 , 0.46) |
| 43.80 | 89 | 79 | 22 | 106 | 0.46 (0.42 , 0.49) | 0.78 (0.75 , 0.82) | 0.80 (0.77 , 0.83) | 0.43 (0.39 , 0.46) |
| 42.90 | 89 | 78 | 23 | 106 | 0.46 (0.42 , 0.49) | 0.77 (0.74 , 0.81) | 0.79 (0.76 , 0.82) | 0.42 (0.39 , 0.46) |
| 42.70 | 90 | 78 | 23 | 105 | 0.46 (0.43 , 0.50) | 0.77 (0.74 , 0.81) | 0.80 (0.77 , 0.83) | 0.43 (0.39 , 0.46) |
| 42.20 | 90 | 76 | 25 | 105 | 0.46 (0.43 , 0.50) | 0.75 (0.72 , 0.79) | 0.78 (0.75 , 0.81) | 0.42 (0.38 , 0.46) |
| 40.90 | 91 | 76 | 25 | 104 | 0.47 (0.43 , 0.50) | 0.75 (0.72 , 0.79) | 0.78 (0.75 , 0.82) | 0.42 (0.39 , 0.46) |
| 40.80 | 92 | 76 | 25 | 103 | 0.47 (0.44 , 0.51) | 0.75 (0.72 , 0.79) | 0.79 (0.76 , 0.82) | 0.42 (0.39 , 0.46) |
| 40.20 | 93 | 76 | 25 | 102 | 0.48 (0.44 , 0.51) | 0.75 (0.72 , 0.79) | 0.79 (0.76 , 0.82) | 0.43 (0.39 , 0.46) |
| 40.00 | 94 | 76 | 25 | 101 | 0.48 (0.45 , 0.52) | 0.75 (0.72 , 0.79) | 0.79 (0.76 , 0.82) | 0.43 (0.39 , 0.47) |
| 39.30 | 95 | 75 | 26 | 100 | 0.49 (0.45 , 0.52) | 0.74 (0.71 , 0.78) | 0.79 (0.76 , 0.82) | 0.43 (0.39 , 0.46) |

|       |     |    |    |     |                    |                    |                    |                    |
|-------|-----|----|----|-----|--------------------|--------------------|--------------------|--------------------|
| 38.40 | 95  | 74 | 27 | 100 | 0.49 (0.45 , 0.52) | 0.73 (0.69 , 0.77) | 0.78 (0.75 , 0.81) | 0.43 (0.39 , 0.46) |
| 37.90 | 96  | 73 | 28 | 99  | 0.49 (0.46 , 0.53) | 0.72 (0.68 , 0.76) | 0.77 (0.74 , 0.80) | 0.42 (0.39 , 0.46) |
| 37.50 | 98  | 73 | 28 | 97  | 0.50 (0.47 , 0.54) | 0.72 (0.68 , 0.76) | 0.78 (0.75 , 0.81) | 0.43 (0.39 , 0.47) |
| 37.40 | 99  | 73 | 28 | 96  | 0.51 (0.47 , 0.54) | 0.72 (0.68 , 0.76) | 0.78 (0.75 , 0.81) | 0.43 (0.39 , 0.47) |
| 36.90 | 100 | 73 | 28 | 95  | 0.51 (0.48 , 0.55) | 0.72 (0.68 , 0.76) | 0.78 (0.75 , 0.81) | 0.43 (0.40 , 0.47) |
| 36.70 | 100 | 72 | 29 | 95  | 0.51 (0.48 , 0.55) | 0.71 (0.67 , 0.75) | 0.78 (0.75 , 0.81) | 0.43 (0.39 , 0.47) |
| 36.60 | 100 | 71 | 30 | 95  | 0.51 (0.48 , 0.55) | 0.70 (0.66 , 0.74) | 0.77 (0.74 , 0.80) | 0.43 (0.39 , 0.46) |
| 36.40 | 102 | 71 | 30 | 93  | 0.52 (0.49 , 0.56) | 0.70 (0.66 , 0.74) | 0.77 (0.74 , 0.80) | 0.43 (0.40 , 0.47) |
| 36.20 | 103 | 71 | 30 | 92  | 0.53 (0.49 , 0.56) | 0.70 (0.66 , 0.74) | 0.77 (0.74 , 0.80) | 0.44 (0.40 , 0.47) |
| 36.10 | 103 | 70 | 31 | 92  | 0.53 (0.49 , 0.56) | 0.69 (0.65 , 0.73) | 0.77 (0.74 , 0.80) | 0.43 (0.39 , 0.47) |
| 35.90 | 104 | 69 | 32 | 91  | 0.53 (0.50 , 0.57) | 0.68 (0.64 , 0.73) | 0.76 (0.73 , 0.79) | 0.43 (0.39 , 0.47) |
| 35.50 | 106 | 69 | 32 | 89  | 0.54 (0.51 , 0.58) | 0.68 (0.64 , 0.73) | 0.77 (0.74 , 0.80) | 0.44 (0.40 , 0.48) |
| 35.40 | 107 | 69 | 32 | 88  | 0.55 (0.51 , 0.58) | 0.68 (0.64 , 0.73) | 0.77 (0.74 , 0.80) | 0.44 (0.40 , 0.48) |
| 34.90 | 108 | 69 | 32 | 87  | 0.55 (0.52 , 0.59) | 0.68 (0.64 , 0.73) | 0.77 (0.74 , 0.80) | 0.44 (0.40 , 0.48) |
| 34.30 | 110 | 69 | 32 | 85  | 0.56 (0.53 , 0.60) | 0.68 (0.64 , 0.73) | 0.77 (0.75 , 0.80) | 0.45 (0.41 , 0.49) |
| 34.20 | 111 | 69 | 32 | 84  | 0.57 (0.53 , 0.60) | 0.68 (0.64 , 0.73) | 0.78 (0.75 , 0.80) | 0.45 (0.41 , 0.49) |
| 34.10 | 111 | 68 | 33 | 84  | 0.57 (0.53 , 0.60) | 0.67 (0.63 , 0.72) | 0.77 (0.74 , 0.80) | 0.45 (0.41 , 0.49) |
| 33.40 | 112 | 68 | 33 | 83  | 0.57 (0.54 , 0.61) | 0.67 (0.63 , 0.72) | 0.77 (0.74 , 0.80) | 0.45 (0.41 , 0.49) |
| 33.30 | 113 | 68 | 33 | 82  | 0.58 (0.55 , 0.61) | 0.67 (0.63 , 0.72) | 0.77 (0.75 , 0.80) | 0.45 (0.41 , 0.49) |
| 33.00 | 114 | 68 | 33 | 81  | 0.58 (0.55 , 0.62) | 0.67 (0.63 , 0.72) | 0.78 (0.75 , 0.80) | 0.46 (0.42 , 0.50) |
| 32.90 | 116 | 68 | 33 | 79  | 0.59 (0.56 , 0.63) | 0.67 (0.63 , 0.72) | 0.78 (0.75 , 0.81) | 0.46 (0.42 , 0.50) |
| 32.80 | 117 | 68 | 33 | 78  | 0.60 (0.57 , 0.63) | 0.67 (0.63 , 0.72) | 0.78 (0.75 , 0.81) | 0.47 (0.43 , 0.51) |

|       |     |    |    |    |                    |                    |                    |                    |
|-------|-----|----|----|----|--------------------|--------------------|--------------------|--------------------|
| 32.70 | 117 | 67 | 34 | 78 | 0.60 (0.57 , 0.63) | 0.66 (0.62 , 0.71) | 0.77 (0.75 , 0.80) | 0.46 (0.42 , 0.50) |
| 32.40 | 118 | 67 | 34 | 77 | 0.61 (0.57 , 0.64) | 0.66 (0.62 , 0.71) | 0.78 (0.75 , 0.80) | 0.47 (0.42 , 0.51) |
| 32.10 | 118 | 66 | 35 | 77 | 0.61 (0.57 , 0.64) | 0.65 (0.61 , 0.70) | 0.77 (0.74 , 0.80) | 0.46 (0.42 , 0.50) |
| 32.00 | 118 | 65 | 36 | 77 | 0.61 (0.57 , 0.64) | 0.64 (0.60 , 0.69) | 0.77 (0.74 , 0.79) | 0.46 (0.42 , 0.50) |
| 31.50 | 118 | 64 | 37 | 77 | 0.61 (0.57 , 0.64) | 0.63 (0.59 , 0.68) | 0.76 (0.73 , 0.79) | 0.45 (0.41 , 0.49) |
| 31.40 | 119 | 64 | 37 | 76 | 0.61 (0.58 , 0.64) | 0.63 (0.59 , 0.68) | 0.76 (0.73 , 0.79) | 0.46 (0.42 , 0.50) |
| 31.30 | 120 | 64 | 37 | 75 | 0.62 (0.58 , 0.65) | 0.63 (0.59 , 0.68) | 0.76 (0.74 , 0.79) | 0.46 (0.42 , 0.50) |
| 30.00 | 122 | 64 | 37 | 73 | 0.63 (0.59 , 0.66) | 0.63 (0.59 , 0.68) | 0.77 (0.74 , 0.80) | 0.47 (0.43 , 0.51) |
| 29.30 | 122 | 63 | 38 | 73 | 0.63 (0.59 , 0.66) | 0.62 (0.58 , 0.67) | 0.76 (0.73 , 0.79) | 0.46 (0.42 , 0.51) |
| 28.70 | 124 | 62 | 39 | 71 | 0.64 (0.60 , 0.67) | 0.61 (0.57 , 0.66) | 0.76 (0.73 , 0.79) | 0.47 (0.42 , 0.51) |
| 28.60 | 125 | 62 | 39 | 70 | 0.64 (0.61 , 0.67) | 0.61 (0.57 , 0.66) | 0.76 (0.73 , 0.79) | 0.47 (0.43 , 0.51) |
| 28.30 | 126 | 62 | 39 | 69 | 0.65 (0.61 , 0.68) | 0.61 (0.57 , 0.66) | 0.76 (0.74 , 0.79) | 0.47 (0.43 , 0.52) |
| 28.20 | 126 | 61 | 40 | 69 | 0.65 (0.61 , 0.68) | 0.60 (0.56 , 0.65) | 0.76 (0.73 , 0.79) | 0.47 (0.43 , 0.51) |
| 27.90 | 127 | 61 | 40 | 68 | 0.65 (0.62 , 0.68) | 0.60 (0.56 , 0.65) | 0.76 (0.73 , 0.79) | 0.47 (0.43 , 0.52) |
| 27.50 | 127 | 60 | 41 | 68 | 0.65 (0.62 , 0.68) | 0.59 (0.55 , 0.64) | 0.76 (0.73 , 0.78) | 0.47 (0.43 , 0.51) |
| 27.30 | 128 | 60 | 41 | 67 | 0.66 (0.62 , 0.69) | 0.59 (0.55 , 0.64) | 0.76 (0.73 , 0.79) | 0.47 (0.43 , 0.52) |
| 26.80 | 129 | 60 | 41 | 66 | 0.66 (0.63 , 0.69) | 0.59 (0.55 , 0.64) | 0.76 (0.73 , 0.79) | 0.48 (0.43 , 0.52) |
| 26.60 | 130 | 60 | 41 | 65 | 0.67 (0.64 , 0.70) | 0.59 (0.55 , 0.64) | 0.76 (0.73 , 0.79) | 0.48 (0.44 , 0.52) |
| 26.40 | 131 | 59 | 42 | 64 | 0.67 (0.64 , 0.70) | 0.58 (0.54 , 0.63) | 0.76 (0.73 , 0.78) | 0.48 (0.44 , 0.52) |
| 26.10 | 131 | 58 | 43 | 64 | 0.67 (0.64 , 0.70) | 0.57 (0.53 , 0.62) | 0.75 (0.73 , 0.78) | 0.48 (0.43 , 0.52) |
| 25.60 | 132 | 58 | 43 | 63 | 0.68 (0.65 , 0.71) | 0.57 (0.53 , 0.62) | 0.75 (0.73 , 0.78) | 0.48 (0.43 , 0.52) |
| 25.50 | 133 | 58 | 43 | 62 | 0.68 (0.65 , 0.71) | 0.57 (0.53 , 0.62) | 0.76 (0.73 , 0.78) | 0.48 (0.44 , 0.53) |

|       |     |    |    |    |                    |                    |                    |                    |
|-------|-----|----|----|----|--------------------|--------------------|--------------------|--------------------|
| 25.00 | 133 | 57 | 44 | 62 | 0.68 (0.65 , 0.71) | 0.56 (0.52 , 0.61) | 0.75 (0.72 , 0.78) | 0.48 (0.43 , 0.52) |
| 24.90 | 134 | 57 | 44 | 61 | 0.69 (0.66 , 0.72) | 0.56 (0.52 , 0.61) | 0.75 (0.73 , 0.78) | 0.48 (0.44 , 0.53) |
| 24.70 | 134 | 56 | 45 | 61 | 0.69 (0.66 , 0.72) | 0.55 (0.51 , 0.60) | 0.75 (0.72 , 0.78) | 0.48 (0.43 , 0.52) |
| 24.40 | 135 | 56 | 45 | 60 | 0.69 (0.66 , 0.72) | 0.55 (0.51 , 0.60) | 0.75 (0.72 , 0.78) | 0.48 (0.44 , 0.53) |
| 24.20 | 136 | 56 | 45 | 59 | 0.70 (0.67 , 0.73) | 0.55 (0.51 , 0.60) | 0.75 (0.72 , 0.78) | 0.49 (0.44 , 0.53) |
| 24.10 | 137 | 55 | 46 | 58 | 0.70 (0.67 , 0.73) | 0.54 (0.50 , 0.59) | 0.75 (0.72 , 0.78) | 0.49 (0.44 , 0.53) |
| 23.40 | 137 | 54 | 47 | 58 | 0.70 (0.67 , 0.73) | 0.53 (0.49 , 0.58) | 0.74 (0.72 , 0.77) | 0.48 (0.44 , 0.53) |
| 23.30 | 138 | 54 | 47 | 57 | 0.71 (0.68 , 0.74) | 0.53 (0.49 , 0.58) | 0.75 (0.72 , 0.77) | 0.49 (0.44 , 0.53) |
| 23.20 | 138 | 53 | 48 | 57 | 0.71 (0.68 , 0.74) | 0.52 (0.48 , 0.57) | 0.74 (0.71 , 0.77) | 0.48 (0.44 , 0.53) |
| 23.00 | 138 | 52 | 49 | 57 | 0.71 (0.68 , 0.74) | 0.51 (0.47 , 0.56) | 0.74 (0.71 , 0.77) | 0.48 (0.43 , 0.52) |
| 22.90 | 139 | 52 | 49 | 56 | 0.71 (0.68 , 0.74) | 0.51 (0.47 , 0.56) | 0.74 (0.71 , 0.77) | 0.48 (0.43 , 0.53) |
| 22.60 | 140 | 52 | 49 | 55 | 0.72 (0.69 , 0.75) | 0.51 (0.47 , 0.56) | 0.74 (0.71 , 0.77) | 0.49 (0.44 , 0.53) |
| 22.10 | 141 | 52 | 49 | 54 | 0.72 (0.69 , 0.75) | 0.51 (0.47 , 0.56) | 0.74 (0.71 , 0.77) | 0.49 (0.44 , 0.54) |
| 22.00 | 142 | 52 | 49 | 53 | 0.73 (0.70 , 0.76) | 0.51 (0.47 , 0.56) | 0.74 (0.72 , 0.77) | 0.50 (0.45 , 0.54) |
| 21.90 | 143 | 50 | 51 | 52 | 0.73 (0.71 , 0.76) | 0.50 (0.45 , 0.54) | 0.74 (0.71 , 0.76) | 0.49 (0.44 , 0.54) |
| 21.60 | 144 | 49 | 52 | 51 | 0.74 (0.71 , 0.77) | 0.49 (0.44 , 0.53) | 0.73 (0.71 , 0.76) | 0.49 (0.44 , 0.54) |
| 21.50 | 144 | 48 | 53 | 51 | 0.74 (0.71 , 0.77) | 0.48 (0.43 , 0.52) | 0.73 (0.70 , 0.76) | 0.48 (0.44 , 0.53) |
| 20.80 | 144 | 47 | 54 | 51 | 0.74 (0.71 , 0.77) | 0.47 (0.42 , 0.51) | 0.73 (0.70 , 0.75) | 0.48 (0.43 , 0.53) |
| 20.30 | 144 | 46 | 55 | 51 | 0.74 (0.71 , 0.77) | 0.46 (0.41 , 0.50) | 0.72 (0.70 , 0.75) | 0.47 (0.42 , 0.52) |
| 19.40 | 145 | 44 | 57 | 50 | 0.74 (0.72 , 0.77) | 0.44 (0.39 , 0.48) | 0.72 (0.69 , 0.75) | 0.47 (0.42 , 0.52) |
| 19.20 | 146 | 44 | 57 | 49 | 0.75 (0.72 , 0.78) | 0.44 (0.39 , 0.48) | 0.72 (0.69 , 0.75) | 0.47 (0.42 , 0.52) |
| 19.10 | 147 | 44 | 57 | 48 | 0.75 (0.73 , 0.78) | 0.44 (0.39 , 0.48) | 0.72 (0.69 , 0.75) | 0.48 (0.43 , 0.53) |

|       |     |    |    |    |                    |                    |                    |                    |
|-------|-----|----|----|----|--------------------|--------------------|--------------------|--------------------|
| 18.60 | 147 | 43 | 58 | 48 | 0.75 (0.73 , 0.78) | 0.43 (0.38 , 0.47) | 0.72 (0.69 , 0.74) | 0.47 (0.42 , 0.52) |
| 18.50 | 148 | 43 | 58 | 47 | 0.76 (0.73 , 0.78) | 0.43 (0.38 , 0.47) | 0.72 (0.69 , 0.75) | 0.48 (0.43 , 0.53) |
| 18.40 | 148 | 42 | 59 | 47 | 0.76 (0.73 , 0.78) | 0.42 (0.37 , 0.46) | 0.71 (0.69 , 0.74) | 0.47 (0.42 , 0.52) |
| 17.70 | 149 | 42 | 59 | 46 | 0.76 (0.74 , 0.79) | 0.42 (0.37 , 0.46) | 0.72 (0.69 , 0.74) | 0.48 (0.43 , 0.53) |
| 17.60 | 149 | 41 | 60 | 46 | 0.76 (0.74 , 0.79) | 0.41 (0.36 , 0.45) | 0.71 (0.69 , 0.74) | 0.47 (0.42 , 0.52) |
| 17.40 | 149 | 40 | 61 | 46 | 0.76 (0.74 , 0.79) | 0.40 (0.35 , 0.44) | 0.71 (0.68 , 0.74) | 0.47 (0.41 , 0.52) |
| 17.30 | 150 | 40 | 61 | 45 | 0.77 (0.74 , 0.79) | 0.40 (0.35 , 0.44) | 0.71 (0.68 , 0.74) | 0.47 (0.42 , 0.52) |
| 17.20 | 151 | 40 | 61 | 44 | 0.77 (0.75 , 0.80) | 0.40 (0.35 , 0.44) | 0.71 (0.68 , 0.74) | 0.48 (0.42 , 0.53) |
| 17.00 | 152 | 40 | 61 | 43 | 0.78 (0.76 , 0.80) | 0.40 (0.35 , 0.44) | 0.71 (0.69 , 0.74) | 0.48 (0.43 , 0.54) |
| 16.90 | 153 | 40 | 61 | 42 | 0.78 (0.76 , 0.81) | 0.40 (0.35 , 0.44) | 0.71 (0.69 , 0.74) | 0.49 (0.43 , 0.54) |
| 16.10 | 155 | 40 | 61 | 40 | 0.79 (0.77 , 0.82) | 0.40 (0.35 , 0.44) | 0.72 (0.69 , 0.74) | 0.50 (0.45 , 0.55) |
| 16.00 | 155 | 39 | 62 | 40 | 0.79 (0.77 , 0.82) | 0.39 (0.34 , 0.43) | 0.71 (0.69 , 0.74) | 0.49 (0.44 , 0.55) |
| 15.90 | 156 | 39 | 62 | 39 | 0.80 (0.78 , 0.82) | 0.39 (0.34 , 0.43) | 0.72 (0.69 , 0.74) | 0.50 (0.44 , 0.56) |
| 15.30 | 157 | 39 | 62 | 38 | 0.81 (0.78 , 0.83) | 0.39 (0.34 , 0.43) | 0.72 (0.69 , 0.74) | 0.51 (0.45 , 0.56) |
| 15.20 | 159 | 39 | 62 | 36 | 0.82 (0.79 , 0.84) | 0.39 (0.34 , 0.43) | 0.72 (0.69 , 0.75) | 0.52 (0.46 , 0.58) |
| 15.00 | 160 | 38 | 63 | 35 | 0.82 (0.80 , 0.84) | 0.38 (0.33 , 0.42) | 0.72 (0.69 , 0.74) | 0.52 (0.46 , 0.58) |
| 14.20 | 161 | 38 | 63 | 34 | 0.83 (0.81 , 0.85) | 0.38 (0.33 , 0.42) | 0.72 (0.69 , 0.75) | 0.53 (0.47 , 0.59) |
| 14.10 | 161 | 37 | 64 | 34 | 0.83 (0.81 , 0.85) | 0.37 (0.32 , 0.41) | 0.72 (0.69 , 0.74) | 0.52 (0.46 , 0.58) |
| 14.00 | 162 | 37 | 64 | 33 | 0.83 (0.81 , 0.85) | 0.37 (0.32 , 0.41) | 0.72 (0.69 , 0.74) | 0.53 (0.47 , 0.59) |
| 13.90 | 163 | 37 | 64 | 32 | 0.84 (0.82 , 0.86) | 0.37 (0.32 , 0.41) | 0.72 (0.69 , 0.74) | 0.54 (0.48 , 0.59) |
| 13.50 | 164 | 36 | 65 | 31 | 0.84 (0.82 , 0.86) | 0.36 (0.31 , 0.40) | 0.72 (0.69 , 0.74) | 0.54 (0.48 , 0.60) |
| 13.30 | 165 | 36 | 65 | 30 | 0.85 (0.83 , 0.86) | 0.36 (0.31 , 0.40) | 0.72 (0.69 , 0.74) | 0.55 (0.49 , 0.61) |

|       |     |    |    |    |                    |                    |                    |                    |
|-------|-----|----|----|----|--------------------|--------------------|--------------------|--------------------|
| 13.20 | 165 | 35 | 66 | 30 | 0.85 (0.83 , 0.86) | 0.35 (0.30 , 0.39) | 0.71 (0.69 , 0.74) | 0.54 (0.48 , 0.60) |
| 13.00 | 166 | 35 | 66 | 29 | 0.85 (0.83 , 0.87) | 0.35 (0.30 , 0.39) | 0.72 (0.69 , 0.74) | 0.55 (0.49 , 0.61) |
| 12.00 | 167 | 35 | 66 | 28 | 0.86 (0.84 , 0.87) | 0.35 (0.30 , 0.39) | 0.72 (0.69 , 0.74) | 0.56 (0.49 , 0.62) |
| 11.90 | 167 | 34 | 67 | 28 | 0.86 (0.84 , 0.87) | 0.34 (0.29 , 0.38) | 0.71 (0.69 , 0.74) | 0.55 (0.49 , 0.61) |
| 11.50 | 167 | 33 | 68 | 28 | 0.86 (0.84 , 0.87) | 0.33 (0.28 , 0.37) | 0.71 (0.68 , 0.74) | 0.54 (0.48 , 0.60) |
| 11.30 | 168 | 33 | 68 | 27 | 0.86 (0.84 , 0.88) | 0.33 (0.28 , 0.37) | 0.71 (0.69 , 0.74) | 0.55 (0.49 , 0.61) |
| 11.00 | 169 | 31 | 70 | 26 | 0.87 (0.85 , 0.88) | 0.31 (0.27 , 0.35) | 0.71 (0.68 , 0.73) | 0.54 (0.48 , 0.61) |
| 10.60 | 169 | 30 | 71 | 26 | 0.87 (0.85 , 0.88) | 0.30 (0.26 , 0.34) | 0.70 (0.68 , 0.73) | 0.54 (0.47 , 0.60) |
| 10.50 | 170 | 30 | 71 | 25 | 0.87 (0.86 , 0.89) | 0.30 (0.26 , 0.34) | 0.71 (0.68 , 0.73) | 0.55 (0.48 , 0.61) |
| 10.40 | 170 | 29 | 72 | 25 | 0.87 (0.86 , 0.89) | 0.29 (0.25 , 0.33) | 0.70 (0.68 , 0.73) | 0.54 (0.47 , 0.60) |
| 10.30 | 171 | 28 | 73 | 24 | 0.88 (0.86 , 0.89) | 0.28 (0.24 , 0.32) | 0.70 (0.67 , 0.73) | 0.54 (0.47 , 0.61) |
| 10.00 | 171 | 27 | 74 | 24 | 0.88 (0.86 , 0.89) | 0.27 (0.23 , 0.31) | 0.70 (0.67 , 0.72) | 0.53 (0.46 , 0.60) |
| 9.70  | 172 | 27 | 74 | 23 | 0.88 (0.87 , 0.90) | 0.27 (0.23 , 0.31) | 0.70 (0.67 , 0.73) | 0.54 (0.47 , 0.61) |
| 9.60  | 172 | 26 | 75 | 23 | 0.88 (0.87 , 0.90) | 0.26 (0.22 , 0.29) | 0.70 (0.67 , 0.72) | 0.53 (0.46 , 0.60) |
| 9.50  | 174 | 26 | 75 | 21 | 0.89 (0.88 , 0.91) | 0.26 (0.22 , 0.29) | 0.70 (0.67 , 0.72) | 0.55 (0.48 , 0.62) |
| 9.40  | 175 | 25 | 76 | 20 | 0.90 (0.88 , 0.91) | 0.25 (0.21 , 0.28) | 0.70 (0.67 , 0.72) | 0.56 (0.48 , 0.63) |
| 9.20  | 176 | 24 | 77 | 19 | 0.90 (0.89 , 0.91) | 0.24 (0.20 , 0.27) | 0.70 (0.67 , 0.72) | 0.56 (0.48 , 0.63) |
| 9.10  | 177 | 23 | 78 | 18 | 0.91 (0.90 , 0.92) | 0.23 (0.19 , 0.26) | 0.69 (0.67 , 0.72) | 0.56 (0.49 , 0.64) |
| 8.90  | 177 | 21 | 80 | 18 | 0.91 (0.90 , 0.92) | 0.21 (0.18 , 0.24) | 0.69 (0.66 , 0.71) | 0.54 (0.46 , 0.62) |
| 8.80  | 178 | 21 | 80 | 17 | 0.91 (0.90 , 0.92) | 0.21 (0.18 , 0.24) | 0.69 (0.66 , 0.72) | 0.55 (0.47 , 0.63) |
| 8.40  | 179 | 20 | 81 | 16 | 0.92 (0.91 , 0.93) | 0.20 (0.17 , 0.23) | 0.69 (0.66 , 0.71) | 0.56 (0.47 , 0.64) |
| 8.30  | 180 | 20 | 81 | 15 | 0.92 (0.91 , 0.93) | 0.20 (0.17 , 0.23) | 0.69 (0.66 , 0.72) | 0.57 (0.49 , 0.65) |



|      |     |    |    |    |                    |                    |                    |                    |
|------|-----|----|----|----|--------------------|--------------------|--------------------|--------------------|
| 8.10 | 181 | 19 | 82 | 14 | 0.93 (0.92 , 0.94) | 0.19 (0.16 , 0.22) | 0.69 (0.66 , 0.71) | 0.58 (0.49 , 0.66) |
| 7.40 | 182 | 18 | 83 | 13 | 0.93 (0.92 , 0.94) | 0.18 (0.15 , 0.21) | 0.69 (0.66 , 0.71) | 0.58 (0.49 , 0.67) |
| 7.10 | 182 | 17 | 84 | 13 | 0.93 (0.92 , 0.94) | 0.17 (0.14 , 0.20) | 0.68 (0.66 , 0.71) | 0.57 (0.48 , 0.65) |
| 6.80 | 183 | 17 | 84 | 12 | 0.94 (0.93 , 0.95) | 0.17 (0.14 , 0.20) | 0.69 (0.66 , 0.71) | 0.59 (0.50 , 0.67) |
| 6.70 | 183 | 16 | 85 | 12 | 0.94 (0.93 , 0.95) | 0.16 (0.13 , 0.18) | 0.68 (0.66 , 0.71) | 0.57 (0.48 , 0.66) |
| 6.50 | 184 | 14 | 87 | 11 | 0.94 (0.94 , 0.95) | 0.14 (0.12 , 0.16) | 0.68 (0.65 , 0.70) | 0.56 (0.46 , 0.66) |
| 6.40 | 185 | 14 | 87 | 10 | 0.95 (0.94 , 0.96) | 0.14 (0.12 , 0.16) | 0.68 (0.65 , 0.71) | 0.58 (0.49 , 0.68) |
| 6.30 | 186 | 14 | 87 | 9  | 0.95 (0.95 , 0.96) | 0.14 (0.12 , 0.16) | 0.68 (0.66 , 0.71) | 0.61 (0.51 , 0.71) |
| 5.60 | 187 | 14 | 87 | 8  | 0.96 (0.95 , 0.96) | 0.14 (0.12 , 0.16) | 0.68 (0.66 , 0.71) | 0.64 (0.54 , 0.73) |
| 5.50 | 188 | 14 | 87 | 7  | 0.96 (0.96 , 0.97) | 0.14 (0.12 , 0.16) | 0.68 (0.66 , 0.71) | 0.67 (0.57 , 0.76) |
| 5.40 | 188 | 13 | 88 | 7  | 0.96 (0.96 , 0.97) | 0.13 (0.11 , 0.15) | 0.68 (0.66 , 0.71) | 0.65 (0.55 , 0.75) |
| 5.10 | 189 | 13 | 88 | 6  | 0.97 (0.97 , 0.97) | 0.13 (0.11 , 0.15) | 0.68 (0.66 , 0.71) | 0.68 (0.59 , 0.78) |
| 4.90 | 190 | 13 | 88 | 5  | 0.97 (0.97 , 0.98) | 0.13 (0.11 , 0.15) | 0.68 (0.66 , 0.71) | 0.72 (0.63 , 0.81) |
| 4.80 | 190 | 12 | 89 | 5  | 0.97 (0.97 , 0.98) | 0.12 (0.10 , 0.14) | 0.68 (0.66 , 0.71) | 0.71 (0.61 , 0.80) |
| 4.74 | 190 | 11 | 90 | 5  | 0.97 (0.97 , 0.98) | 0.11 (0.09 , 0.13) | 0.68 (0.65 , 0.70) | 0.69 (0.58 , 0.79) |
| 4.50 | 190 | 9  | 92 | 5  | 0.97 (0.97 , 0.98) | 0.09 (0.07 , 0.10) | 0.67 (0.65 , 0.70) | 0.64 (0.52 , 0.76) |
| 4.30 | 190 | 8  | 93 | 5  | 0.97 (0.97 , 0.98) | 0.08 (0.06 , 0.09) | 0.67 (0.65 , 0.70) | 0.62 (0.49 , 0.74) |
| 4.20 | 191 | 8  | 93 | 4  | 0.98 (0.98 , 0.98) | 0.08 (0.06 , 0.09) | 0.67 (0.65 , 0.70) | 0.67 (0.54 , 0.79) |
| 4.00 | 192 | 8  | 93 | 3  | 0.98 (0.98 , 0.99) | 0.08 (0.06 , 0.09) | 0.67 (0.65 , 0.70) | 0.73 (0.61 , 0.84) |
| 3.80 | 193 | 8  | 93 | 2  | 0.99 (0.99 , 0.99) | 0.08 (0.06 , 0.09) | 0.67 (0.65 , 0.70) | 0.80 (0.70 , 0.90) |
| 3.60 | 194 | 8  | 93 | 1  | 0.99 (0.99 , 1.00) | 0.08 (0.06 , 0.09) | 0.68 (0.65 , 0.70) | 0.89 (0.82 , 0.95) |
| 3.50 | 194 | 7  | 94 | 1  | 0.99 (0.99 , 1.00) | 0.07 (0.06 , 0.08) | 0.67 (0.65 , 0.70) | 0.88 (0.80 , 0.95) |

|      |     |   |     |   |                    |                    |                    |                    |
|------|-----|---|-----|---|--------------------|--------------------|--------------------|--------------------|
| 3.40 | 195 | 7 | 94  | 0 | 1.00 (1.00 , 1.00) | 0.07 (0.06 , 0.08) | 0.67 (0.65 , 0.70) | 1.00 (1.00 , 1.00) |
| 2.50 | 195 | 5 | 96  | 0 | 1.00 (1.00 , 1.00) | 0.05 (0.04 , 0.06) | 0.67 (0.64 , 0.70) | 1.00 (1.00 , 1.00) |
| 2.20 | 195 | 4 | 97  | 0 | 1.00 (1.00 , 1.00) | 0.04 (0.03 , 0.05) | 0.67 (0.64 , 0.69) | 1.00 (1.00 , 1.00) |
| 1.60 | 195 | 3 | 98  | 0 | 1.00 (1.00 , 1.00) | 0.03 (0.02 , 0.04) | 0.67 (0.64 , 0.69) | 1.00 (1.00 , 1.00) |
| 1.40 | 195 | 2 | 99  | 0 | 1.00 (1.00 , 1.00) | 0.02 (0.02 , 0.02) | 0.66 (0.64 , 0.69) | 1.00 (1.00 , 1.00) |
| 0.90 | 195 | 1 | 100 | 0 | 1.00 (1.00 , 1.00) | 0.01 (0.01 , 0.01) | 0.66 (0.64 , 0.69) | 1.00 (1.00 , 1.00) |
| 0.80 | 195 | 0 | 101 | 0 | 1.00 (1.00 , 1.00) | 0.00 (0.00 , 0.00) | 0.66 (0.63 , 0.68) | ( , )              |

12

13

14 Supplemental Table 4. Sensitivity, specificity, positive predictive value, and negative predictive value, along with 95%  
 15 confidence intervals, for all observed model counts in combined MC and LUMC data set. MCM, Time 3.

| MC<br>M<br>score | No. of<br>Correctly<br>Predicted<br>Events | No. of<br>Correctly<br>Predicted<br>Nonevents | No. of<br>Nonevents<br>Predicted<br>as<br>Events | No. of<br>Events<br>Predicted<br>as<br>Nonevents | Sensitivity<br>(95% CI) | Specificity<br>(95% CI) | Positive<br>predictive<br>value (95%<br>CI) | Negative<br>predictive<br>value (95%<br>CI) |
|------------------|--------------------------------------------|-----------------------------------------------|--------------------------------------------------|--------------------------------------------------|-------------------------|-------------------------|---------------------------------------------|---------------------------------------------|
| 100.00           | 1                                          | 101                                           | 0                                                | 194                                              | 0.01 (0.00 , 0.01)      | 1.00 (1.00 , 1.00)      | 1.00 (1.00 , 1.00)                          | 0.34 (0.32 , 0.37)                          |
| 99.90            | 2                                          | 101                                           | 0                                                | 193                                              | 0.01 (0.01 , 0.01)      | 1.00 (1.00 , 1.00)      | 1.00 (1.00 , 1.00)                          | 0.34 (0.32 , 0.37)                          |
| 99.50            | 4                                          | 101                                           | 0                                                | 191                                              | 0.02 (0.02 , 0.02)      | 1.00 (1.00 , 1.00)      | 1.00 (1.00 , 1.00)                          | 0.35 (0.32 , 0.37)                          |
| 99.30            | 5                                          | 101                                           | 0                                                | 190                                              | 0.03 (0.02 , 0.03)      | 1.00 (1.00 , 1.00)      | 1.00 (1.00 , 1.00)                          | 0.35 (0.32 , 0.37)                          |
| 99.00            | 6                                          | 101                                           | 0                                                | 189                                              | 0.03 (0.03 , 0.03)      | 1.00 (1.00 , 1.00)      | 1.00 (1.00 , 1.00)                          | 0.35 (0.32 , 0.37)                          |
| 97.20            | 7                                          | 101                                           | 0                                                | 188                                              | 0.04 (0.03 , 0.04)      | 1.00 (1.00 , 1.00)      | 1.00 (1.00 , 1.00)                          | 0.35 (0.32 , 0.38)                          |
| 97.00            | 8                                          | 101                                           | 0                                                | 187                                              | 0.04 (0.04 , 0.05)      | 1.00 (1.00 , 1.00)      | 1.00 (1.00 , 1.00)                          | 0.35 (0.32 , 0.38)                          |
| 95.40            | 9                                          | 101                                           | 0                                                | 186                                              | 0.05 (0.04 , 0.05)      | 1.00 (1.00 , 1.00)      | 1.00 (1.00 , 1.00)                          | 0.35 (0.33 , 0.38)                          |
| 95.30            | 10                                         | 101                                           | 0                                                | 185                                              | 0.05 (0.04 , 0.06)      | 1.00 (1.00 , 1.00)      | 1.00 (1.00 , 1.00)                          | 0.35 (0.33 , 0.38)                          |
| 93.70            | 10                                         | 100                                           | 1                                                | 185                                              | 0.05 (0.04 , 0.06)      | 0.99 (0.99 , 0.99)      | 0.91 (0.86 , 0.96)                          | 0.35 (0.32 , 0.38)                          |
| 93.50            | 11                                         | 100                                           | 1                                                | 184                                              | 0.06 (0.05 , 0.06)      | 0.99 (0.99 , 0.99)      | 0.92 (0.87 , 0.96)                          | 0.35 (0.33 , 0.38)                          |
| 92.90            | 12                                         | 100                                           | 1                                                | 183                                              | 0.06 (0.05 , 0.07)      | 0.99 (0.99 , 0.99)      | 0.92 (0.88 , 0.96)                          | 0.35 (0.33 , 0.38)                          |
| 92.60            | 14                                         | 100                                           | 1                                                | 181                                              | 0.07 (0.06 , 0.08)      | 0.99 (0.99 , 0.99)      | 0.93 (0.90 , 0.96)                          | 0.36 (0.33 , 0.38)                          |
| 92.50            | 15                                         | 100                                           | 1                                                | 180                                              | 0.08 (0.07 , 0.09)      | 0.99 (0.99 , 0.99)      | 0.94 (0.91 , 0.97)                          | 0.36 (0.33 , 0.38)                          |
| 92.40            | 16                                         | 100                                           | 1                                                | 179                                              | 0.08 (0.07 , 0.09)      | 0.99 (0.99 , 0.99)      | 0.94 (0.91 , 0.97)                          | 0.36 (0.33 , 0.39)                          |
| 92.00            | 17                                         | 100                                           | 1                                                | 178                                              | 0.09 (0.08 , 0.10)      | 0.99 (0.99 , 0.99)      | 0.94 (0.92 , 0.97)                          | 0.36 (0.33 , 0.39)                          |
| 91.90            | 18                                         | 100                                           | 1                                                | 177                                              | 0.09 (0.08 , 0.10)      | 0.99 (0.99 , 0.99)      | 0.95 (0.92 , 0.97)                          | 0.36 (0.33 , 0.39)                          |

|       |    |     |   |     |                    |                    |                    |                    |
|-------|----|-----|---|-----|--------------------|--------------------|--------------------|--------------------|
| 91.60 | 19 | 100 | 1 | 176 | 0.10 (0.09 , 0.11) | 0.99 (0.99 , 0.99) | 0.95 (0.93 , 0.97) | 0.36 (0.34 , 0.39) |
| 91.50 | 20 | 100 | 1 | 175 | 0.10 (0.09 , 0.12) | 0.99 (0.99 , 0.99) | 0.95 (0.93 , 0.97) | 0.36 (0.34 , 0.39) |
| 91.30 | 21 | 100 | 1 | 174 | 0.11 (0.09 , 0.12) | 0.99 (0.99 , 0.99) | 0.95 (0.94 , 0.97) | 0.36 (0.34 , 0.39) |
| 90.40 | 22 | 100 | 1 | 173 | 0.11 (0.10 , 0.13) | 0.99 (0.99 , 0.99) | 0.96 (0.94 , 0.97) | 0.37 (0.34 , 0.39) |
| 89.00 | 24 | 100 | 1 | 171 | 0.12 (0.11 , 0.14) | 0.99 (0.99 , 0.99) | 0.96 (0.94 , 0.98) | 0.37 (0.34 , 0.40) |
| 87.70 | 25 | 100 | 1 | 170 | 0.13 (0.11 , 0.14) | 0.99 (0.99 , 0.99) | 0.96 (0.95 , 0.98) | 0.37 (0.34 , 0.40) |
| 87.30 | 26 | 100 | 1 | 169 | 0.13 (0.12 , 0.15) | 0.99 (0.99 , 0.99) | 0.96 (0.95 , 0.98) | 0.37 (0.34 , 0.40) |
| 85.40 | 27 | 100 | 1 | 168 | 0.14 (0.12 , 0.16) | 0.99 (0.99 , 0.99) | 0.96 (0.95 , 0.98) | 0.37 (0.35 , 0.40) |
| 84.80 | 28 | 100 | 1 | 167 | 0.14 (0.13 , 0.16) | 0.99 (0.99 , 0.99) | 0.97 (0.95 , 0.98) | 0.37 (0.35 , 0.40) |
| 84.10 | 29 | 100 | 1 | 166 | 0.15 (0.13 , 0.17) | 0.99 (0.99 , 0.99) | 0.97 (0.96 , 0.98) | 0.38 (0.35 , 0.40) |
| 83.70 | 29 | 98  | 3 | 166 | 0.15 (0.13 , 0.17) | 0.97 (0.96 , 0.98) | 0.91 (0.88 , 0.94) | 0.37 (0.34 , 0.40) |
| 83.10 | 30 | 98  | 3 | 165 | 0.15 (0.14 , 0.17) | 0.97 (0.96 , 0.98) | 0.91 (0.88 , 0.94) | 0.37 (0.34 , 0.40) |
| 82.30 | 31 | 98  | 3 | 164 | 0.16 (0.14 , 0.18) | 0.97 (0.96 , 0.98) | 0.91 (0.88 , 0.94) | 0.37 (0.35 , 0.40) |
| 82.20 | 32 | 98  | 3 | 163 | 0.16 (0.14 , 0.18) | 0.97 (0.96 , 0.98) | 0.91 (0.89 , 0.94) | 0.38 (0.35 , 0.40) |
| 81.70 | 33 | 98  | 3 | 162 | 0.17 (0.15 , 0.19) | 0.97 (0.96 , 0.98) | 0.92 (0.89 , 0.94) | 0.38 (0.35 , 0.41) |
| 81.60 | 34 | 98  | 3 | 161 | 0.17 (0.15 , 0.19) | 0.97 (0.96 , 0.98) | 0.92 (0.89 , 0.94) | 0.38 (0.35 , 0.41) |
| 77.00 | 35 | 98  | 3 | 160 | 0.18 (0.16 , 0.20) | 0.97 (0.96 , 0.98) | 0.92 (0.90 , 0.94) | 0.38 (0.35 , 0.41) |
| 76.40 | 36 | 98  | 3 | 159 | 0.18 (0.16 , 0.21) | 0.97 (0.96 , 0.98) | 0.92 (0.90 , 0.95) | 0.38 (0.35 , 0.41) |
| 76.00 | 37 | 98  | 3 | 158 | 0.19 (0.17 , 0.21) | 0.97 (0.96 , 0.98) | 0.93 (0.90 , 0.95) | 0.38 (0.35 , 0.41) |
| 75.80 | 39 | 98  | 3 | 156 | 0.20 (0.18 , 0.22) | 0.97 (0.96 , 0.98) | 0.93 (0.91 , 0.95) | 0.39 (0.36 , 0.41) |
| 75.60 | 40 | 98  | 3 | 155 | 0.21 (0.18 , 0.23) | 0.97 (0.96 , 0.98) | 0.93 (0.91 , 0.95) | 0.39 (0.36 , 0.42) |
| 75.40 | 40 | 97  | 4 | 155 | 0.21 (0.18 , 0.23) | 0.96 (0.95 , 0.97) | 0.91 (0.88 , 0.93) | 0.38 (0.36 , 0.41) |

|       |    |    |    |     |                    |                    |                    |                    |
|-------|----|----|----|-----|--------------------|--------------------|--------------------|--------------------|
| 74.00 | 40 | 96 | 5  | 155 | 0.21 (0.18 , 0.23) | 0.95 (0.94 , 0.96) | 0.89 (0.86 , 0.92) | 0.38 (0.35 , 0.41) |
| 73.70 | 41 | 96 | 5  | 154 | 0.21 (0.19 , 0.23) | 0.95 (0.94 , 0.96) | 0.89 (0.86 , 0.92) | 0.38 (0.35 , 0.41) |
| 73.00 | 43 | 96 | 5  | 152 | 0.22 (0.20 , 0.24) | 0.95 (0.94 , 0.96) | 0.90 (0.87 , 0.92) | 0.39 (0.36 , 0.42) |
| 72.10 | 44 | 96 | 5  | 151 | 0.23 (0.20 , 0.25) | 0.95 (0.94 , 0.96) | 0.90 (0.87 , 0.92) | 0.39 (0.36 , 0.42) |
| 70.50 | 45 | 96 | 5  | 150 | 0.23 (0.21 , 0.26) | 0.95 (0.94 , 0.96) | 0.90 (0.88 , 0.92) | 0.39 (0.36 , 0.42) |
| 70.40 | 46 | 96 | 5  | 149 | 0.24 (0.21 , 0.26) | 0.95 (0.94 , 0.96) | 0.90 (0.88 , 0.93) | 0.39 (0.36 , 0.42) |
| 70.20 | 46 | 94 | 7  | 149 | 0.24 (0.21 , 0.26) | 0.93 (0.92 , 0.94) | 0.87 (0.84 , 0.90) | 0.39 (0.36 , 0.42) |
| 68.90 | 49 | 94 | 7  | 146 | 0.25 (0.22 , 0.28) | 0.93 (0.92 , 0.94) | 0.88 (0.85 , 0.90) | 0.39 (0.36 , 0.42) |
| 68.50 | 51 | 94 | 7  | 144 | 0.26 (0.23 , 0.29) | 0.93 (0.92 , 0.94) | 0.88 (0.85 , 0.91) | 0.39 (0.36 , 0.43) |
| 68.40 | 52 | 94 | 7  | 143 | 0.27 (0.24 , 0.29) | 0.93 (0.92 , 0.94) | 0.88 (0.85 , 0.91) | 0.40 (0.37 , 0.43) |
| 68.00 | 53 | 94 | 7  | 142 | 0.27 (0.24 , 0.30) | 0.93 (0.92 , 0.94) | 0.88 (0.86 , 0.91) | 0.40 (0.37 , 0.43) |
| 67.90 | 55 | 94 | 7  | 140 | 0.28 (0.25 , 0.31) | 0.93 (0.92 , 0.94) | 0.89 (0.86 , 0.91) | 0.40 (0.37 , 0.43) |
| 67.50 | 56 | 94 | 7  | 139 | 0.29 (0.26 , 0.32) | 0.93 (0.92 , 0.94) | 0.89 (0.86 , 0.91) | 0.40 (0.37 , 0.43) |
| 66.90 | 57 | 94 | 7  | 138 | 0.29 (0.26 , 0.32) | 0.93 (0.92 , 0.94) | 0.89 (0.87 , 0.91) | 0.41 (0.37 , 0.44) |
| 65.50 | 57 | 93 | 8  | 138 | 0.29 (0.26 , 0.32) | 0.92 (0.91 , 0.94) | 0.88 (0.85 , 0.90) | 0.40 (0.37 , 0.43) |
| 65.30 | 58 | 93 | 8  | 137 | 0.30 (0.27 , 0.33) | 0.92 (0.91 , 0.94) | 0.88 (0.85 , 0.90) | 0.40 (0.37 , 0.44) |
| 65.20 | 59 | 93 | 8  | 136 | 0.30 (0.27 , 0.33) | 0.92 (0.91 , 0.94) | 0.88 (0.86 , 0.91) | 0.41 (0.37 , 0.44) |
| 64.60 | 60 | 93 | 8  | 135 | 0.31 (0.28 , 0.34) | 0.92 (0.91 , 0.94) | 0.88 (0.86 , 0.91) | 0.41 (0.38 , 0.44) |
| 64.20 | 60 | 92 | 9  | 135 | 0.31 (0.28 , 0.34) | 0.91 (0.90 , 0.93) | 0.87 (0.84 , 0.90) | 0.41 (0.37 , 0.44) |
| 63.70 | 60 | 91 | 10 | 135 | 0.31 (0.28 , 0.34) | 0.90 (0.88 , 0.92) | 0.86 (0.83 , 0.89) | 0.40 (0.37 , 0.43) |
| 63.50 | 61 | 91 | 10 | 134 | 0.31 (0.28 , 0.34) | 0.90 (0.88 , 0.92) | 0.86 (0.83 , 0.89) | 0.40 (0.37 , 0.44) |
| 63.00 | 62 | 91 | 10 | 133 | 0.32 (0.29 , 0.35) | 0.90 (0.88 , 0.92) | 0.86 (0.83 , 0.89) | 0.41 (0.37 , 0.44) |

|       |    |    |    |     |                    |                    |                    |                    |
|-------|----|----|----|-----|--------------------|--------------------|--------------------|--------------------|
| 62.90 | 62 | 90 | 11 | 133 | 0.32 (0.29 , 0.35) | 0.89 (0.87 , 0.91) | 0.85 (0.82 , 0.88) | 0.40 (0.37 , 0.44) |
| 62.80 | 62 | 89 | 12 | 133 | 0.32 (0.29 , 0.35) | 0.88 (0.86 , 0.90) | 0.84 (0.81 , 0.87) | 0.40 (0.37 , 0.43) |
| 62.00 | 63 | 89 | 12 | 132 | 0.32 (0.29 , 0.35) | 0.88 (0.86 , 0.90) | 0.84 (0.81 , 0.87) | 0.40 (0.37 , 0.43) |
| 61.90 | 63 | 88 | 13 | 132 | 0.32 (0.29 , 0.35) | 0.87 (0.85 , 0.89) | 0.83 (0.80 , 0.86) | 0.40 (0.37 , 0.43) |
| 61.20 | 64 | 88 | 13 | 131 | 0.33 (0.30 , 0.36) | 0.87 (0.85 , 0.89) | 0.83 (0.80 , 0.86) | 0.40 (0.37 , 0.43) |
| 60.60 | 65 | 88 | 13 | 130 | 0.33 (0.30 , 0.36) | 0.87 (0.85 , 0.89) | 0.83 (0.80 , 0.86) | 0.40 (0.37 , 0.44) |
| 60.50 | 66 | 88 | 13 | 129 | 0.34 (0.31 , 0.37) | 0.87 (0.85 , 0.89) | 0.84 (0.81 , 0.87) | 0.41 (0.37 , 0.44) |
| 59.60 | 67 | 88 | 13 | 128 | 0.34 (0.31 , 0.38) | 0.87 (0.85 , 0.89) | 0.84 (0.81 , 0.87) | 0.41 (0.38 , 0.44) |
| 59.50 | 68 | 88 | 13 | 127 | 0.35 (0.32 , 0.38) | 0.87 (0.85 , 0.89) | 0.84 (0.81 , 0.87) | 0.41 (0.38 , 0.44) |
| 59.00 | 68 | 87 | 14 | 127 | 0.35 (0.32 , 0.38) | 0.86 (0.84 , 0.88) | 0.83 (0.80 , 0.86) | 0.41 (0.37 , 0.44) |
| 57.90 | 69 | 87 | 14 | 126 | 0.35 (0.32 , 0.39) | 0.86 (0.84 , 0.88) | 0.83 (0.80 , 0.86) | 0.41 (0.38 , 0.44) |
| 57.70 | 69 | 86 | 15 | 126 | 0.35 (0.32 , 0.39) | 0.85 (0.83 , 0.88) | 0.82 (0.79 , 0.85) | 0.41 (0.37 , 0.44) |
| 57.40 | 70 | 86 | 15 | 125 | 0.36 (0.33 , 0.39) | 0.85 (0.83 , 0.88) | 0.82 (0.79 , 0.85) | 0.41 (0.38 , 0.44) |
| 57.00 | 71 | 86 | 15 | 124 | 0.36 (0.33 , 0.40) | 0.85 (0.83 , 0.88) | 0.83 (0.80 , 0.86) | 0.41 (0.38 , 0.44) |
| 56.90 | 72 | 86 | 15 | 123 | 0.37 (0.34 , 0.40) | 0.85 (0.83 , 0.88) | 0.83 (0.80 , 0.86) | 0.41 (0.38 , 0.44) |
| 56.60 | 72 | 85 | 16 | 123 | 0.37 (0.34 , 0.40) | 0.84 (0.82 , 0.87) | 0.82 (0.79 , 0.85) | 0.41 (0.38 , 0.44) |
| 56.00 | 72 | 84 | 17 | 123 | 0.37 (0.34 , 0.40) | 0.83 (0.80 , 0.86) | 0.81 (0.78 , 0.84) | 0.41 (0.37 , 0.44) |
| 55.70 | 73 | 84 | 17 | 122 | 0.37 (0.34 , 0.41) | 0.83 (0.80 , 0.86) | 0.81 (0.78 , 0.84) | 0.41 (0.37 , 0.44) |
| 55.50 | 74 | 84 | 17 | 121 | 0.38 (0.35 , 0.41) | 0.83 (0.80 , 0.86) | 0.81 (0.78 , 0.84) | 0.41 (0.38 , 0.44) |
| 55.40 | 75 | 84 | 17 | 120 | 0.38 (0.35 , 0.42) | 0.83 (0.80 , 0.86) | 0.82 (0.78 , 0.85) | 0.41 (0.38 , 0.45) |
| 55.30 | 76 | 84 | 17 | 119 | 0.39 (0.36 , 0.42) | 0.83 (0.80 , 0.86) | 0.82 (0.79 , 0.85) | 0.41 (0.38 , 0.45) |
| 54.90 | 76 | 83 | 18 | 119 | 0.39 (0.36 , 0.42) | 0.82 (0.79 , 0.85) | 0.81 (0.78 , 0.84) | 0.41 (0.38 , 0.44) |

|       |    |    |    |     |                    |                    |                    |                    |
|-------|----|----|----|-----|--------------------|--------------------|--------------------|--------------------|
| 54.40 | 77 | 83 | 18 | 118 | 0.39 (0.36 , 0.43) | 0.82 (0.79 , 0.85) | 0.81 (0.78 , 0.84) | 0.41 (0.38 , 0.45) |
| 54.30 | 77 | 82 | 19 | 118 | 0.39 (0.36 , 0.43) | 0.81 (0.78 , 0.84) | 0.80 (0.77 , 0.83) | 0.41 (0.38 , 0.44) |
| 54.00 | 78 | 82 | 19 | 117 | 0.40 (0.37 , 0.43) | 0.81 (0.78 , 0.84) | 0.80 (0.77 , 0.84) | 0.41 (0.38 , 0.45) |
| 53.80 | 79 | 80 | 21 | 116 | 0.41 (0.37 , 0.44) | 0.79 (0.76 , 0.82) | 0.79 (0.76 , 0.82) | 0.41 (0.37 , 0.44) |
| 53.60 | 80 | 80 | 21 | 115 | 0.41 (0.38 , 0.44) | 0.79 (0.76 , 0.82) | 0.79 (0.76 , 0.82) | 0.41 (0.38 , 0.44) |
| 53.50 | 81 | 80 | 21 | 114 | 0.42 (0.38 , 0.45) | 0.79 (0.76 , 0.82) | 0.79 (0.76 , 0.83) | 0.41 (0.38 , 0.45) |
| 53.40 | 82 | 79 | 22 | 113 | 0.42 (0.39 , 0.45) | 0.78 (0.75 , 0.82) | 0.79 (0.76 , 0.82) | 0.41 (0.38 , 0.45) |
| 52.80 | 82 | 78 | 23 | 113 | 0.42 (0.39 , 0.45) | 0.77 (0.74 , 0.81) | 0.78 (0.75 , 0.81) | 0.41 (0.37 , 0.44) |
| 51.90 | 83 | 77 | 24 | 112 | 0.43 (0.39 , 0.46) | 0.76 (0.73 , 0.80) | 0.78 (0.74 , 0.81) | 0.41 (0.37 , 0.44) |
| 51.70 | 84 | 77 | 24 | 111 | 0.43 (0.40 , 0.47) | 0.76 (0.73 , 0.80) | 0.78 (0.75 , 0.81) | 0.41 (0.38 , 0.44) |
| 51.50 | 85 | 77 | 24 | 110 | 0.44 (0.40 , 0.47) | 0.76 (0.73 , 0.80) | 0.78 (0.75 , 0.81) | 0.41 (0.38 , 0.45) |
| 51.10 | 86 | 77 | 24 | 109 | 0.44 (0.41 , 0.48) | 0.76 (0.73 , 0.80) | 0.78 (0.75 , 0.81) | 0.41 (0.38 , 0.45) |
| 50.60 | 88 | 77 | 24 | 107 | 0.45 (0.42 , 0.49) | 0.76 (0.73 , 0.80) | 0.79 (0.75 , 0.82) | 0.42 (0.38 , 0.45) |
| 50.30 | 89 | 77 | 24 | 106 | 0.46 (0.42 , 0.49) | 0.76 (0.73 , 0.80) | 0.79 (0.76 , 0.82) | 0.42 (0.39 , 0.46) |
| 50.10 | 91 | 77 | 24 | 104 | 0.47 (0.43 , 0.50) | 0.76 (0.73 , 0.80) | 0.79 (0.76 , 0.82) | 0.43 (0.39 , 0.46) |
| 49.90 | 92 | 77 | 24 | 103 | 0.47 (0.44 , 0.51) | 0.76 (0.73 , 0.80) | 0.79 (0.76 , 0.82) | 0.43 (0.39 , 0.46) |
| 49.10 | 92 | 76 | 25 | 103 | 0.47 (0.44 , 0.51) | 0.75 (0.72 , 0.79) | 0.79 (0.76 , 0.82) | 0.42 (0.39 , 0.46) |
| 48.10 | 92 | 75 | 26 | 103 | 0.47 (0.44 , 0.51) | 0.74 (0.71 , 0.78) | 0.78 (0.75 , 0.81) | 0.42 (0.39 , 0.46) |
| 47.90 | 93 | 75 | 26 | 102 | 0.48 (0.44 , 0.51) | 0.74 (0.71 , 0.78) | 0.78 (0.75 , 0.81) | 0.42 (0.39 , 0.46) |
| 47.60 | 94 | 74 | 27 | 101 | 0.48 (0.45 , 0.52) | 0.73 (0.69 , 0.77) | 0.78 (0.75 , 0.81) | 0.42 (0.39 , 0.46) |
| 46.90 | 95 | 74 | 27 | 100 | 0.49 (0.45 , 0.52) | 0.73 (0.69 , 0.77) | 0.78 (0.75 , 0.81) | 0.43 (0.39 , 0.46) |
| 46.70 | 96 | 74 | 27 | 99  | 0.49 (0.46 , 0.53) | 0.73 (0.69 , 0.77) | 0.78 (0.75 , 0.81) | 0.43 (0.39 , 0.46) |

|       |     |    |    |    |                    |                    |                    |                    |
|-------|-----|----|----|----|--------------------|--------------------|--------------------|--------------------|
| 46.20 | 97  | 74 | 27 | 98 | 0.50 (0.46 , 0.53) | 0.73 (0.69 , 0.77) | 0.78 (0.75 , 0.81) | 0.43 (0.39 , 0.47) |
| 45.90 | 98  | 74 | 27 | 97 | 0.50 (0.47 , 0.54) | 0.73 (0.69 , 0.77) | 0.78 (0.75 , 0.81) | 0.43 (0.40 , 0.47) |
| 45.70 | 99  | 74 | 27 | 96 | 0.51 (0.47 , 0.54) | 0.73 (0.69 , 0.77) | 0.79 (0.76 , 0.82) | 0.44 (0.40 , 0.47) |
| 45.50 | 100 | 74 | 27 | 95 | 0.51 (0.48 , 0.55) | 0.73 (0.69 , 0.77) | 0.79 (0.76 , 0.82) | 0.44 (0.40 , 0.47) |
| 45.20 | 101 | 74 | 27 | 94 | 0.52 (0.48 , 0.55) | 0.73 (0.69 , 0.77) | 0.79 (0.76 , 0.82) | 0.44 (0.40 , 0.48) |
| 44.80 | 102 | 74 | 27 | 93 | 0.52 (0.49 , 0.56) | 0.73 (0.69 , 0.77) | 0.79 (0.76 , 0.82) | 0.44 (0.41 , 0.48) |
| 44.70 | 103 | 74 | 27 | 92 | 0.53 (0.49 , 0.56) | 0.73 (0.69 , 0.77) | 0.79 (0.76 , 0.82) | 0.45 (0.41 , 0.48) |
| 43.80 | 105 | 74 | 27 | 90 | 0.54 (0.50 , 0.57) | 0.73 (0.69 , 0.77) | 0.80 (0.77 , 0.82) | 0.45 (0.41 , 0.49) |
| 42.80 | 105 | 73 | 28 | 90 | 0.54 (0.50 , 0.57) | 0.72 (0.68 , 0.76) | 0.79 (0.76 , 0.82) | 0.45 (0.41 , 0.49) |
| 42.70 | 106 | 73 | 28 | 89 | 0.54 (0.51 , 0.58) | 0.72 (0.68 , 0.76) | 0.79 (0.76 , 0.82) | 0.45 (0.41 , 0.49) |
| 42.30 | 106 | 72 | 29 | 89 | 0.54 (0.51 , 0.58) | 0.71 (0.67 , 0.75) | 0.79 (0.76 , 0.81) | 0.45 (0.41 , 0.49) |
| 42.20 | 106 | 71 | 30 | 89 | 0.54 (0.51 , 0.58) | 0.70 (0.66 , 0.74) | 0.78 (0.75 , 0.81) | 0.44 (0.41 , 0.48) |
| 41.50 | 106 | 70 | 31 | 89 | 0.54 (0.51 , 0.58) | 0.69 (0.65 , 0.73) | 0.77 (0.74 , 0.80) | 0.44 (0.40 , 0.48) |
| 40.90 | 108 | 70 | 31 | 87 | 0.55 (0.52 , 0.59) | 0.69 (0.65 , 0.73) | 0.78 (0.75 , 0.81) | 0.45 (0.41 , 0.48) |
| 40.70 | 109 | 70 | 31 | 86 | 0.56 (0.52 , 0.59) | 0.69 (0.65 , 0.73) | 0.78 (0.75 , 0.81) | 0.45 (0.41 , 0.49) |
| 39.30 | 111 | 70 | 31 | 84 | 0.57 (0.53 , 0.60) | 0.69 (0.65 , 0.73) | 0.78 (0.75 , 0.81) | 0.45 (0.42 , 0.49) |
| 38.60 | 112 | 70 | 31 | 83 | 0.57 (0.54 , 0.61) | 0.69 (0.65 , 0.73) | 0.78 (0.76 , 0.81) | 0.46 (0.42 , 0.50) |
| 38.40 | 112 | 69 | 32 | 83 | 0.57 (0.54 , 0.61) | 0.68 (0.64 , 0.73) | 0.78 (0.75 , 0.81) | 0.45 (0.41 , 0.49) |
| 37.90 | 112 | 68 | 33 | 83 | 0.57 (0.54 , 0.61) | 0.67 (0.63 , 0.72) | 0.77 (0.74 , 0.80) | 0.45 (0.41 , 0.49) |
| 37.50 | 114 | 68 | 33 | 81 | 0.58 (0.55 , 0.62) | 0.67 (0.63 , 0.72) | 0.78 (0.75 , 0.80) | 0.46 (0.42 , 0.50) |
| 37.40 | 115 | 68 | 33 | 80 | 0.59 (0.56 , 0.62) | 0.67 (0.63 , 0.72) | 0.78 (0.75 , 0.80) | 0.46 (0.42 , 0.50) |
| 37.30 | 116 | 68 | 33 | 79 | 0.59 (0.56 , 0.63) | 0.67 (0.63 , 0.72) | 0.78 (0.75 , 0.81) | 0.46 (0.42 , 0.50) |



|       |     |    |    |    |                    |                    |                    |                    |
|-------|-----|----|----|----|--------------------|--------------------|--------------------|--------------------|
| 36.90 | 117 | 68 | 33 | 78 | 0.60 (0.57 , 0.63) | 0.67 (0.63 , 0.72) | 0.78 (0.75 , 0.81) | 0.47 (0.43 , 0.51) |
| 36.70 | 117 | 67 | 34 | 78 | 0.60 (0.57 , 0.63) | 0.66 (0.62 , 0.71) | 0.77 (0.75 , 0.80) | 0.46 (0.42 , 0.50) |
| 36.60 | 117 | 66 | 35 | 78 | 0.60 (0.57 , 0.63) | 0.65 (0.61 , 0.70) | 0.77 (0.74 , 0.80) | 0.46 (0.42 , 0.50) |
| 36.40 | 118 | 66 | 35 | 77 | 0.61 (0.57 , 0.64) | 0.65 (0.61 , 0.70) | 0.77 (0.74 , 0.80) | 0.46 (0.42 , 0.50) |
| 36.10 | 118 | 65 | 36 | 77 | 0.61 (0.57 , 0.64) | 0.64 (0.60 , 0.69) | 0.77 (0.74 , 0.79) | 0.46 (0.42 , 0.50) |
| 35.90 | 118 | 64 | 37 | 77 | 0.61 (0.57 , 0.64) | 0.63 (0.59 , 0.68) | 0.76 (0.73 , 0.79) | 0.45 (0.41 , 0.49) |
| 35.50 | 120 | 64 | 37 | 75 | 0.62 (0.58 , 0.65) | 0.63 (0.59 , 0.68) | 0.76 (0.74 , 0.79) | 0.46 (0.42 , 0.50) |
| 35.10 | 121 | 64 | 37 | 74 | 0.62 (0.59 , 0.65) | 0.63 (0.59 , 0.68) | 0.77 (0.74 , 0.79) | 0.46 (0.42 , 0.51) |
| 34.90 | 122 | 64 | 37 | 73 | 0.63 (0.59 , 0.66) | 0.63 (0.59 , 0.68) | 0.77 (0.74 , 0.80) | 0.47 (0.43 , 0.51) |
| 34.30 | 123 | 64 | 37 | 72 | 0.63 (0.60 , 0.66) | 0.63 (0.59 , 0.68) | 0.77 (0.74 , 0.80) | 0.47 (0.43 , 0.51) |
| 34.20 | 124 | 64 | 37 | 71 | 0.64 (0.60 , 0.67) | 0.63 (0.59 , 0.68) | 0.77 (0.74 , 0.80) | 0.47 (0.43 , 0.52) |
| 34.10 | 124 | 63 | 38 | 71 | 0.64 (0.60 , 0.67) | 0.62 (0.58 , 0.67) | 0.77 (0.74 , 0.79) | 0.47 (0.43 , 0.51) |
| 33.40 | 125 | 63 | 38 | 70 | 0.64 (0.61 , 0.67) | 0.62 (0.58 , 0.67) | 0.77 (0.74 , 0.79) | 0.47 (0.43 , 0.52) |
| 33.30 | 126 | 63 | 38 | 69 | 0.65 (0.61 , 0.68) | 0.62 (0.58 , 0.67) | 0.77 (0.74 , 0.80) | 0.48 (0.43 , 0.52) |
| 33.10 | 127 | 63 | 38 | 68 | 0.65 (0.62 , 0.68) | 0.62 (0.58 , 0.67) | 0.77 (0.74 , 0.80) | 0.48 (0.44 , 0.52) |
| 33.00 | 128 | 63 | 38 | 67 | 0.66 (0.62 , 0.69) | 0.62 (0.58 , 0.67) | 0.77 (0.74 , 0.80) | 0.48 (0.44 , 0.53) |
| 32.90 | 130 | 63 | 38 | 65 | 0.67 (0.64 , 0.70) | 0.62 (0.58 , 0.67) | 0.77 (0.75 , 0.80) | 0.49 (0.45 , 0.54) |
| 32.80 | 131 | 63 | 38 | 64 | 0.67 (0.64 , 0.70) | 0.62 (0.58 , 0.67) | 0.78 (0.75 , 0.80) | 0.50 (0.45 , 0.54) |
| 32.70 | 131 | 62 | 39 | 64 | 0.67 (0.64 , 0.70) | 0.61 (0.57 , 0.66) | 0.77 (0.74 , 0.80) | 0.49 (0.45 , 0.54) |
| 32.40 | 132 | 62 | 39 | 63 | 0.68 (0.65 , 0.71) | 0.61 (0.57 , 0.66) | 0.77 (0.75 , 0.80) | 0.50 (0.45 , 0.54) |
| 32.10 | 132 | 61 | 40 | 63 | 0.68 (0.65 , 0.71) | 0.60 (0.56 , 0.65) | 0.77 (0.74 , 0.79) | 0.49 (0.45 , 0.54) |
| 31.50 | 132 | 60 | 41 | 63 | 0.68 (0.65 , 0.71) | 0.59 (0.55 , 0.64) | 0.76 (0.74 , 0.79) | 0.49 (0.44 , 0.53) |

|       |     |    |    |    |                    |                    |                    |                    |
|-------|-----|----|----|----|--------------------|--------------------|--------------------|--------------------|
| 31.30 | 134 | 60 | 41 | 61 | 0.69 (0.66 , 0.72) | 0.59 (0.55 , 0.64) | 0.77 (0.74 , 0.79) | 0.50 (0.45 , 0.54) |
| 30.10 | 135 | 60 | 41 | 60 | 0.69 (0.66 , 0.72) | 0.59 (0.55 , 0.64) | 0.77 (0.74 , 0.79) | 0.50 (0.46 , 0.54) |
| 29.50 | 135 | 59 | 42 | 60 | 0.69 (0.66 , 0.72) | 0.58 (0.54 , 0.63) | 0.76 (0.74 , 0.79) | 0.50 (0.45 , 0.54) |
| 29.10 | 135 | 58 | 43 | 60 | 0.69 (0.66 , 0.72) | 0.57 (0.53 , 0.62) | 0.76 (0.73 , 0.79) | 0.49 (0.45 , 0.54) |
| 28.70 | 136 | 58 | 43 | 59 | 0.70 (0.67 , 0.73) | 0.57 (0.53 , 0.62) | 0.76 (0.73 , 0.79) | 0.50 (0.45 , 0.54) |
| 28.50 | 137 | 58 | 43 | 58 | 0.70 (0.67 , 0.73) | 0.57 (0.53 , 0.62) | 0.76 (0.73 , 0.79) | 0.50 (0.45 , 0.55) |
| 28.30 | 138 | 58 | 43 | 57 | 0.71 (0.68 , 0.74) | 0.57 (0.53 , 0.62) | 0.76 (0.74 , 0.79) | 0.50 (0.46 , 0.55) |
| 28.20 | 138 | 57 | 44 | 57 | 0.71 (0.68 , 0.74) | 0.56 (0.52 , 0.61) | 0.76 (0.73 , 0.78) | 0.50 (0.45 , 0.55) |
| 28.10 | 139 | 57 | 44 | 56 | 0.71 (0.68 , 0.74) | 0.56 (0.52 , 0.61) | 0.76 (0.73 , 0.79) | 0.50 (0.46 , 0.55) |
| 28.00 | 140 | 56 | 45 | 55 | 0.72 (0.69 , 0.75) | 0.55 (0.51 , 0.60) | 0.76 (0.73 , 0.78) | 0.50 (0.46 , 0.55) |
| 27.90 | 141 | 56 | 45 | 54 | 0.72 (0.69 , 0.75) | 0.55 (0.51 , 0.60) | 0.76 (0.73 , 0.78) | 0.51 (0.46 , 0.56) |
| 27.40 | 141 | 55 | 46 | 54 | 0.72 (0.69 , 0.75) | 0.54 (0.50 , 0.59) | 0.75 (0.73 , 0.78) | 0.50 (0.46 , 0.55) |
| 26.80 | 142 | 55 | 46 | 53 | 0.73 (0.70 , 0.76) | 0.54 (0.50 , 0.59) | 0.76 (0.73 , 0.78) | 0.51 (0.46 , 0.56) |
| 26.40 | 143 | 54 | 47 | 52 | 0.73 (0.71 , 0.76) | 0.53 (0.49 , 0.58) | 0.75 (0.73 , 0.78) | 0.51 (0.46 , 0.56) |
| 26.10 | 143 | 53 | 48 | 52 | 0.73 (0.71 , 0.76) | 0.52 (0.48 , 0.57) | 0.75 (0.72 , 0.78) | 0.50 (0.46 , 0.55) |
| 25.60 | 144 | 53 | 48 | 51 | 0.74 (0.71 , 0.77) | 0.52 (0.48 , 0.57) | 0.75 (0.72 , 0.78) | 0.51 (0.46 , 0.56) |
| 25.00 | 144 | 52 | 49 | 51 | 0.74 (0.71 , 0.77) | 0.51 (0.47 , 0.56) | 0.75 (0.72 , 0.77) | 0.50 (0.46 , 0.55) |
| 24.80 | 145 | 52 | 49 | 50 | 0.74 (0.72 , 0.77) | 0.51 (0.47 , 0.56) | 0.75 (0.72 , 0.77) | 0.51 (0.46 , 0.56) |
| 24.40 | 146 | 52 | 49 | 49 | 0.75 (0.72 , 0.78) | 0.51 (0.47 , 0.56) | 0.75 (0.72 , 0.78) | 0.51 (0.47 , 0.56) |
| 24.10 | 147 | 52 | 49 | 48 | 0.75 (0.73 , 0.78) | 0.51 (0.47 , 0.56) | 0.75 (0.72 , 0.78) | 0.52 (0.47 , 0.57) |
| 23.70 | 148 | 52 | 49 | 47 | 0.76 (0.73 , 0.78) | 0.51 (0.47 , 0.56) | 0.75 (0.73 , 0.78) | 0.53 (0.48 , 0.57) |
| 23.20 | 148 | 51 | 50 | 47 | 0.76 (0.73 , 0.78) | 0.50 (0.46 , 0.55) | 0.75 (0.72 , 0.77) | 0.52 (0.47 , 0.57) |

|       |     |    |    |    |                    |                    |                    |                    |
|-------|-----|----|----|----|--------------------|--------------------|--------------------|--------------------|
| 23.10 | 149 | 51 | 50 | 46 | 0.76 (0.74 , 0.79) | 0.50 (0.46 , 0.55) | 0.75 (0.72 , 0.77) | 0.53 (0.48 , 0.58) |
| 23.00 | 149 | 50 | 51 | 46 | 0.76 (0.74 , 0.79) | 0.50 (0.45 , 0.54) | 0.75 (0.72 , 0.77) | 0.52 (0.47 , 0.57) |
| 22.90 | 150 | 50 | 51 | 45 | 0.77 (0.74 , 0.79) | 0.50 (0.45 , 0.54) | 0.75 (0.72 , 0.77) | 0.53 (0.48 , 0.58) |
| 22.60 | 151 | 50 | 51 | 44 | 0.77 (0.75 , 0.80) | 0.50 (0.45 , 0.54) | 0.75 (0.72 , 0.77) | 0.53 (0.48 , 0.58) |
| 22.50 | 152 | 49 | 52 | 43 | 0.78 (0.76 , 0.80) | 0.49 (0.44 , 0.53) | 0.75 (0.72 , 0.77) | 0.53 (0.48 , 0.58) |
| 22.30 | 152 | 48 | 53 | 43 | 0.78 (0.76 , 0.80) | 0.48 (0.43 , 0.52) | 0.74 (0.72 , 0.77) | 0.53 (0.48 , 0.58) |
| 22.10 | 153 | 47 | 54 | 42 | 0.78 (0.76 , 0.81) | 0.47 (0.42 , 0.51) | 0.74 (0.71 , 0.77) | 0.53 (0.48 , 0.58) |
| 22.00 | 154 | 47 | 54 | 41 | 0.79 (0.77 , 0.81) | 0.47 (0.42 , 0.51) | 0.74 (0.71 , 0.77) | 0.53 (0.48 , 0.59) |
| 21.90 | 155 | 46 | 55 | 40 | 0.79 (0.77 , 0.82) | 0.46 (0.41 , 0.50) | 0.74 (0.71 , 0.76) | 0.53 (0.48 , 0.59) |
| 21.60 | 156 | 46 | 55 | 39 | 0.80 (0.78 , 0.82) | 0.46 (0.41 , 0.50) | 0.74 (0.71 , 0.77) | 0.54 (0.49 , 0.59) |
| 21.50 | 156 | 45 | 56 | 39 | 0.80 (0.78 , 0.82) | 0.45 (0.40 , 0.49) | 0.74 (0.71 , 0.76) | 0.54 (0.48 , 0.59) |
| 21.10 | 157 | 45 | 56 | 38 | 0.81 (0.78 , 0.83) | 0.45 (0.40 , 0.49) | 0.74 (0.71 , 0.76) | 0.54 (0.49 , 0.60) |
| 20.90 | 158 | 45 | 56 | 37 | 0.81 (0.79 , 0.83) | 0.45 (0.40 , 0.49) | 0.74 (0.71 , 0.76) | 0.55 (0.50 , 0.60) |
| 20.80 | 158 | 44 | 57 | 37 | 0.81 (0.79 , 0.83) | 0.44 (0.39 , 0.48) | 0.73 (0.71 , 0.76) | 0.54 (0.49 , 0.60) |
| 20.50 | 159 | 44 | 57 | 36 | 0.82 (0.79 , 0.84) | 0.44 (0.39 , 0.48) | 0.74 (0.71 , 0.76) | 0.55 (0.50 , 0.60) |
| 20.30 | 159 | 43 | 58 | 36 | 0.82 (0.79 , 0.84) | 0.43 (0.38 , 0.47) | 0.73 (0.71 , 0.76) | 0.54 (0.49 , 0.60) |
| 20.10 | 159 | 42 | 59 | 36 | 0.82 (0.79 , 0.84) | 0.42 (0.37 , 0.46) | 0.73 (0.70 , 0.76) | 0.54 (0.48 , 0.59) |
| 19.40 | 160 | 40 | 61 | 35 | 0.82 (0.80 , 0.84) | 0.40 (0.35 , 0.44) | 0.72 (0.70 , 0.75) | 0.53 (0.48 , 0.59) |
| 19.30 | 161 | 40 | 61 | 34 | 0.83 (0.81 , 0.85) | 0.40 (0.35 , 0.44) | 0.73 (0.70 , 0.75) | 0.54 (0.48 , 0.60) |
| 19.20 | 161 | 39 | 62 | 34 | 0.83 (0.81 , 0.85) | 0.39 (0.34 , 0.43) | 0.72 (0.70 , 0.75) | 0.53 (0.48 , 0.59) |
| 19.10 | 162 | 39 | 62 | 33 | 0.83 (0.81 , 0.85) | 0.39 (0.34 , 0.43) | 0.72 (0.70 , 0.75) | 0.54 (0.48 , 0.60) |
| 18.50 | 163 | 39 | 62 | 32 | 0.84 (0.82 , 0.86) | 0.39 (0.34 , 0.43) | 0.72 (0.70 , 0.75) | 0.55 (0.49 , 0.61) |

|       |     |    |    |    |                    |                    |                    |                    |
|-------|-----|----|----|----|--------------------|--------------------|--------------------|--------------------|
| 18.30 | 163 | 38 | 63 | 32 | 0.84 (0.82 , 0.86) | 0.38 (0.33 , 0.42) | 0.72 (0.70 , 0.75) | 0.54 (0.48 , 0.60) |
| 18.00 | 164 | 38 | 63 | 31 | 0.84 (0.82 , 0.86) | 0.38 (0.33 , 0.42) | 0.72 (0.70 , 0.75) | 0.55 (0.49 , 0.61) |
| 17.50 | 165 | 38 | 63 | 30 | 0.85 (0.83 , 0.86) | 0.38 (0.33 , 0.42) | 0.72 (0.70 , 0.75) | 0.56 (0.50 , 0.62) |
| 17.40 | 165 | 37 | 64 | 30 | 0.85 (0.83 , 0.86) | 0.37 (0.32 , 0.41) | 0.72 (0.69 , 0.75) | 0.55 (0.49 , 0.61) |
| 17.30 | 165 | 36 | 65 | 30 | 0.85 (0.83 , 0.86) | 0.36 (0.31 , 0.40) | 0.72 (0.69 , 0.74) | 0.55 (0.49 , 0.61) |
| 17.20 | 166 | 36 | 65 | 29 | 0.85 (0.83 , 0.87) | 0.36 (0.31 , 0.40) | 0.72 (0.69 , 0.74) | 0.55 (0.49 , 0.61) |
| 16.10 | 167 | 36 | 65 | 28 | 0.86 (0.84 , 0.87) | 0.36 (0.31 , 0.40) | 0.72 (0.69 , 0.75) | 0.56 (0.50 , 0.62) |
| 15.90 | 168 | 36 | 65 | 27 | 0.86 (0.84 , 0.88) | 0.36 (0.31 , 0.40) | 0.72 (0.70 , 0.75) | 0.57 (0.51 , 0.63) |
| 15.70 | 169 | 36 | 65 | 26 | 0.87 (0.85 , 0.88) | 0.36 (0.31 , 0.40) | 0.72 (0.70 , 0.75) | 0.58 (0.52 , 0.64) |
| 14.90 | 170 | 36 | 65 | 25 | 0.87 (0.86 , 0.89) | 0.36 (0.31 , 0.40) | 0.72 (0.70 , 0.75) | 0.59 (0.53 , 0.65) |
| 14.80 | 171 | 36 | 65 | 24 | 0.88 (0.86 , 0.89) | 0.36 (0.31 , 0.40) | 0.72 (0.70 , 0.75) | 0.60 (0.54 , 0.66) |
| 14.70 | 173 | 36 | 65 | 22 | 0.89 (0.87 , 0.90) | 0.36 (0.31 , 0.40) | 0.73 (0.70 , 0.75) | 0.62 (0.56 , 0.68) |
| 14.60 | 174 | 34 | 67 | 21 | 0.89 (0.88 , 0.91) | 0.34 (0.29 , 0.38) | 0.72 (0.70 , 0.75) | 0.62 (0.56 , 0.68) |
| 13.90 | 175 | 34 | 67 | 20 | 0.90 (0.88 , 0.91) | 0.34 (0.29 , 0.38) | 0.72 (0.70 , 0.75) | 0.63 (0.57 , 0.69) |
| 13.20 | 175 | 33 | 68 | 20 | 0.90 (0.88 , 0.91) | 0.33 (0.28 , 0.37) | 0.72 (0.69 , 0.75) | 0.62 (0.56 , 0.69) |
| 12.80 | 176 | 33 | 68 | 19 | 0.90 (0.89 , 0.91) | 0.33 (0.28 , 0.37) | 0.72 (0.70 , 0.75) | 0.63 (0.57 , 0.70) |
| 12.60 | 176 | 32 | 69 | 19 | 0.90 (0.89 , 0.91) | 0.32 (0.27 , 0.36) | 0.72 (0.69 , 0.74) | 0.63 (0.56 , 0.69) |
| 12.00 | 177 | 32 | 69 | 18 | 0.91 (0.90 , 0.92) | 0.32 (0.27 , 0.36) | 0.72 (0.69 , 0.74) | 0.64 (0.58 , 0.70) |
| 11.80 | 178 | 31 | 70 | 17 | 0.91 (0.90 , 0.92) | 0.31 (0.27 , 0.35) | 0.72 (0.69 , 0.74) | 0.65 (0.58 , 0.71) |
| 11.50 | 178 | 30 | 71 | 17 | 0.91 (0.90 , 0.92) | 0.30 (0.26 , 0.34) | 0.71 (0.69 , 0.74) | 0.64 (0.57 , 0.70) |
| 11.00 | 178 | 29 | 72 | 17 | 0.91 (0.90 , 0.92) | 0.29 (0.25 , 0.33) | 0.71 (0.69 , 0.74) | 0.63 (0.56 , 0.70) |
| 10.70 | 179 | 29 | 72 | 16 | 0.92 (0.91 , 0.93) | 0.29 (0.25 , 0.33) | 0.71 (0.69 , 0.74) | 0.64 (0.58 , 0.71) |

|       |     |    |    |    |                    |                    |                    |                    |
|-------|-----|----|----|----|--------------------|--------------------|--------------------|--------------------|
| 10.60 | 180 | 28 | 73 | 15 | 0.92 (0.91 , 0.93) | 0.28 (0.24 , 0.32) | 0.71 (0.69 , 0.74) | 0.65 (0.58 , 0.72) |
| 10.50 | 181 | 27 | 74 | 14 | 0.93 (0.92 , 0.94) | 0.27 (0.23 , 0.31) | 0.71 (0.68 , 0.74) | 0.66 (0.59 , 0.73) |
| 10.40 | 181 | 26 | 75 | 14 | 0.93 (0.92 , 0.94) | 0.26 (0.22 , 0.29) | 0.71 (0.68 , 0.73) | 0.65 (0.58 , 0.72) |
| 10.30 | 182 | 25 | 76 | 13 | 0.93 (0.92 , 0.94) | 0.25 (0.21 , 0.28) | 0.71 (0.68 , 0.73) | 0.66 (0.59 , 0.73) |
| 10.00 | 183 | 24 | 77 | 12 | 0.94 (0.93 , 0.95) | 0.24 (0.20 , 0.27) | 0.70 (0.68 , 0.73) | 0.67 (0.59 , 0.74) |
| 9.70  | 184 | 23 | 78 | 11 | 0.94 (0.94 , 0.95) | 0.23 (0.19 , 0.26) | 0.70 (0.68 , 0.73) | 0.68 (0.60 , 0.75) |
| 9.60  | 184 | 21 | 80 | 11 | 0.94 (0.94 , 0.95) | 0.21 (0.18 , 0.24) | 0.70 (0.67 , 0.72) | 0.66 (0.58 , 0.73) |
| 9.50  | 185 | 21 | 80 | 10 | 0.95 (0.94 , 0.96) | 0.21 (0.18 , 0.24) | 0.70 (0.67 , 0.72) | 0.68 (0.60 , 0.75) |
| 9.40  | 186 | 20 | 81 | 9  | 0.95 (0.95 , 0.96) | 0.20 (0.17 , 0.23) | 0.70 (0.67 , 0.72) | 0.69 (0.61 , 0.77) |
| 9.20  | 186 | 19 | 82 | 9  | 0.95 (0.95 , 0.96) | 0.19 (0.16 , 0.22) | 0.69 (0.67 , 0.72) | 0.68 (0.60 , 0.76) |
| 9.10  | 186 | 17 | 84 | 9  | 0.95 (0.95 , 0.96) | 0.17 (0.14 , 0.20) | 0.69 (0.66 , 0.71) | 0.65 (0.57 , 0.74) |
| 8.90  | 186 | 15 | 86 | 9  | 0.95 (0.95 , 0.96) | 0.15 (0.12 , 0.17) | 0.68 (0.66 , 0.71) | 0.63 (0.53 , 0.72) |
| 8.80  | 187 | 15 | 86 | 8  | 0.96 (0.95 , 0.96) | 0.15 (0.12 , 0.17) | 0.68 (0.66 , 0.71) | 0.65 (0.56 , 0.74) |
| 8.40  | 188 | 15 | 86 | 7  | 0.96 (0.96 , 0.97) | 0.15 (0.12 , 0.17) | 0.69 (0.66 , 0.71) | 0.68 (0.59 , 0.77) |
| 7.80  | 188 | 14 | 87 | 7  | 0.96 (0.96 , 0.97) | 0.14 (0.12 , 0.16) | 0.68 (0.66 , 0.71) | 0.67 (0.57 , 0.76) |
| 7.50  | 189 | 14 | 87 | 6  | 0.97 (0.97 , 0.97) | 0.14 (0.12 , 0.16) | 0.68 (0.66 , 0.71) | 0.70 (0.61 , 0.79) |
| 7.30  | 190 | 14 | 87 | 5  | 0.97 (0.97 , 0.98) | 0.14 (0.12 , 0.16) | 0.69 (0.66 , 0.71) | 0.74 (0.65 , 0.82) |
| 6.80  | 191 | 14 | 87 | 4  | 0.98 (0.98 , 0.98) | 0.14 (0.12 , 0.16) | 0.69 (0.66 , 0.71) | 0.78 (0.70 , 0.86) |
| 6.70  | 191 | 13 | 88 | 4  | 0.98 (0.98 , 0.98) | 0.13 (0.11 , 0.15) | 0.68 (0.66 , 0.71) | 0.76 (0.68 , 0.85) |
| 6.50  | 191 | 12 | 89 | 4  | 0.98 (0.98 , 0.98) | 0.12 (0.10 , 0.14) | 0.68 (0.66 , 0.71) | 0.75 (0.66 , 0.84) |
| 6.40  | 192 | 12 | 89 | 3  | 0.98 (0.98 , 0.99) | 0.12 (0.10 , 0.14) | 0.68 (0.66 , 0.71) | 0.80 (0.72 , 0.88) |
| 6.30  | 193 | 12 | 89 | 2  | 0.99 (0.99 , 0.99) | 0.12 (0.10 , 0.14) | 0.68 (0.66 , 0.71) | 0.86 (0.79 , 0.92) |

|      |     |    |     |   |                    |                    |                    |                    |
|------|-----|----|-----|---|--------------------|--------------------|--------------------|--------------------|
| 6.20 | 193 | 11 | 90  | 2 | 0.99 (0.99 , 0.99) | 0.11 (0.09 , 0.13) | 0.68 (0.66 , 0.71) | 0.85 (0.78 , 0.92) |
| 6.10 | 194 | 11 | 90  | 1 | 0.99 (0.99 , 1.00) | 0.11 (0.09 , 0.13) | 0.68 (0.66 , 0.71) | 0.92 (0.87 , 0.96) |
| 5.50 | 194 | 10 | 91  | 1 | 0.99 (0.99 , 1.00) | 0.10 (0.08 , 0.12) | 0.68 (0.66 , 0.71) | 0.91 (0.86 , 0.96) |
| 5.40 | 194 | 9  | 92  | 1 | 0.99 (0.99 , 1.00) | 0.09 (0.07 , 0.10) | 0.68 (0.65 , 0.70) | 0.90 (0.84 , 0.96) |
| 4.80 | 194 | 8  | 93  | 1 | 0.99 (0.99 , 1.00) | 0.08 (0.06 , 0.09) | 0.68 (0.65 , 0.70) | 0.89 (0.82 , 0.95) |
| 4.74 | 194 | 7  | 94  | 1 | 0.99 (0.99 , 1.00) | 0.07 (0.06 , 0.08) | 0.67 (0.65 , 0.70) | 0.88 (0.80 , 0.95) |
| 4.50 | 194 | 6  | 95  | 1 | 0.99 (0.99 , 1.00) | 0.06 (0.05 , 0.07) | 0.67 (0.65 , 0.70) | 0.86 (0.77 , 0.95) |
| 4.00 | 195 | 6  | 95  | 0 | 1.00 (1.00 , 1.00) | 0.06 (0.05 , 0.07) | 0.67 (0.65 , 0.70) | 1.00 (1.00 , 1.00) |
| 3.50 | 195 | 5  | 96  | 0 | 1.00 (1.00 , 1.00) | 0.05 (0.04 , 0.06) | 0.67 (0.64 , 0.70) | 1.00 (1.00 , 1.00) |
| 2.90 | 195 | 4  | 97  | 0 | 1.00 (1.00 , 1.00) | 0.04 (0.03 , 0.05) | 0.67 (0.64 , 0.69) | 1.00 (1.00 , 1.00) |
| 2.40 | 195 | 3  | 98  | 0 | 1.00 (1.00 , 1.00) | 0.03 (0.02 , 0.04) | 0.67 (0.64 , 0.69) | 1.00 (1.00 , 1.00) |
| 2.10 | 195 | 2  | 99  | 0 | 1.00 (1.00 , 1.00) | 0.02 (0.02 , 0.02) | 0.66 (0.64 , 0.69) | 1.00 (1.00 , 1.00) |
| 1.00 | 195 | 0  | 101 | 0 | 1.00 (1.00 , 1.00) | 0.00 (0.00 , 0.00) | 0.66 (0.63 , 0.68) | ( , )              |

16  
17  
18  
19  
20  
21  
22  
23  
24  
25  
26

27  
28  
29  
30  
31  
32  
33  
34

35 Supplemental Table 5. Assessment of discrimination (area under the ROC curve) and calibration of the CCM and  
36 MCM, overall and by study site.

| Models          | N   | MC                  |                                            | N  | LUMC                |                                            | N   | Total               |                                            |
|-----------------|-----|---------------------|--------------------------------------------|----|---------------------|--------------------------------------------|-----|---------------------|--------------------------------------------|
|                 |     | AUC (95% CI)        | Mean model score (percent with malignancy) |    | AUC (95% CI)        | Mean model score (percent with malignancy) |     | AUC (95% CI)        | Mean model score (percent with malignancy) |
| <b>CC Model</b> |     |                     |                                            |    |                     |                                            |     |                     |                                            |
| <b>Time 1</b>   | 198 | 0.67<br>(0.59-0.74) | 63.0 (63.6)                                | 98 | 0.70<br>(0.59-0.81) | 66.6 (70.4)                                | 296 | 0.68<br>(0.61-0.74) | 64.2 (65.9)                                |
| <b>Time 2</b>   | 99  | 0.75<br>(0.65-0.86) | 64.9 (63.6)                                | 32 | 0.71<br>(0.50-0.92) | 68.8 (75.0)                                | 131 | 0.75<br>(0.65-0.84) | 65.8 (66.4)                                |
| <b>Time 3</b>   | 198 | 0.72<br>(0.64-0.79) | 63.6 (63.6)                                | 98 | 0.73<br>(0.63-0.83) | 67.1 (70.4)                                | 296 | 0.72<br>(0.66-0.78) | 64.7 (65.9)                                |
| <b>MC Model</b> |     |                     |                                            |    |                     |                                            |     |                     |                                            |
| <b>Time 1</b>   | 198 | 0.68<br>(0.60-0.75) | 37.1 (63.6)                                | 98 | 0.66<br>(0.54-0.78) | 40.7 (70.4)                                | 296 | 0.67<br>(0.61-0.74) | 38.3 (65.9)                                |
| <b>Time 2</b>   | 98  | 0.70<br>(0.59-0.81) | 35.2 (63.3)                                | 32 | 0.54<br>(0.29-0.79) | 39.3 (75.0)                                | 130 | 0.67<br>(0.58-0.77) | 36.2 (66.2)                                |
| <b>Time 3</b>   | 198 | 0.71<br>(0.63-0.78) | 40.8 (63.6)                                | 98 | 0.66<br>(0.54-0.78) | 44.5 (70.4)                                | 296 | 0.70<br>(0.63-0.76) | 42.1 (65.9)                                |

37

38

39

40



41 Supplemental Table 6: Associations of benign vs. malignant diagnosis with estimated probability of malignancy,  
 42 overall and by study site.

|                  | MC (N = 198)    |                     | LUMC (N = 98)   |                    | Total (N = 296) |                   | P-value            |
|------------------|-----------------|---------------------|-----------------|--------------------|-----------------|-------------------|--------------------|
|                  | Benign (n = 72) | Malignant (n = 126) | Benign (n = 29) | Malignant (n = 69) | Benign (n=101)  | Malignant (n=195) |                    |
| <b>CC MODEL</b>  |                 |                     |                 |                    |                 |                   |                    |
| <b>Mean (SD)</b> |                 |                     |                 |                    |                 |                   |                    |
| TIME 1           | 53.0 (27.56)    | 68.7 (24.09)        | 55.6(24.38)     | 71.1 (23.75)       | 53.7 (26.59)    | 69.6 (23.94)      | <.001 <sup>1</sup> |
| TIME 2           | 50.4 (27.61)    | 73.1 (18.99)        | 58.7 (17.63)    | 72.2 (21.43)       | 51.9 (26.11)    | 72.9 (19.57)      | <.001 <sup>1</sup> |
| TIME 3           | 51.5(25.87)     | 70.5(20.79)         | 55.2 (22.09)    | 72.1 (23.21)       | 52.5 (24.79)    | 71.0 (21.63)      | <.001 <sup>1</sup> |
| <b>MC MODEL</b>  |                 |                     |                 |                    |                 |                   |                    |
| <b>Mean (SD)</b> |                 |                     |                 |                    |                 |                   |                    |
| TIME 1           | 26.2 (21.86)    | 43.4(29.51)         | 31.2(23.45)     | 44.6 (26.00)       | 27.6 (22.33)    | 43.8 (28.25)      | <.001 <sup>1</sup> |
| TIME 2           | 24.4(18.84)     | 41.4(25.88)         | 35.0 (20.95)    | 40.8 (24.08)       | 26.4 (19.43)    | 41.2 (25.25)      | <.001 <sup>1</sup> |
| TIME 3           | 28.3 (22.57)    | 48.0(28.87)         | 34.6(23.13)     | 48.7 (24.72)       | 30.1 (22.80)    | 48.2 (27.41)      | <.001 <sup>1</sup> |
| N/A              | 36              | 55                  | 21              | 45                 | 57              | 100               |                    |

43 MC, Mayo Clinic; LUMC, Loyola University Medical Center.

44 1. Two-sample t-test

45  
 46  
 47  
 48  
 49  
 50  
 51
